# Supplementary material for: Fully Stretchable Reconfigurable Organic Electrochemical Transistors for Wearable Adaptive Logic Bioelectronics
Source: Research Square preprint supplement (doi:10.21203/rs.3.rs-7305535/v1), 2025-08-20
Supplement: Supplementary file 1 [file 40cfe1e6111a37ca9c8c1759.docx]

**Supplementary Information**

**Fully Stretchable Reconfigurable Organic Electrochemical Transistors for Wearable Adaptive Logic Bioelectronics**

Heena Kim1,†,Taeheon Kim1,†, Yunsu Kim1, Huijeong Lee1, Hyunseok Shim1,*

*1School of Electrical & Electronics Engineering, Pusan National University, Busan 46241, Republic of Korea*

†These authors contributed equally.

*Email: [hshim@pusan.ac.kr](mailto:hshim@pusan.ac.kr)

**Supplementary Figures**

**
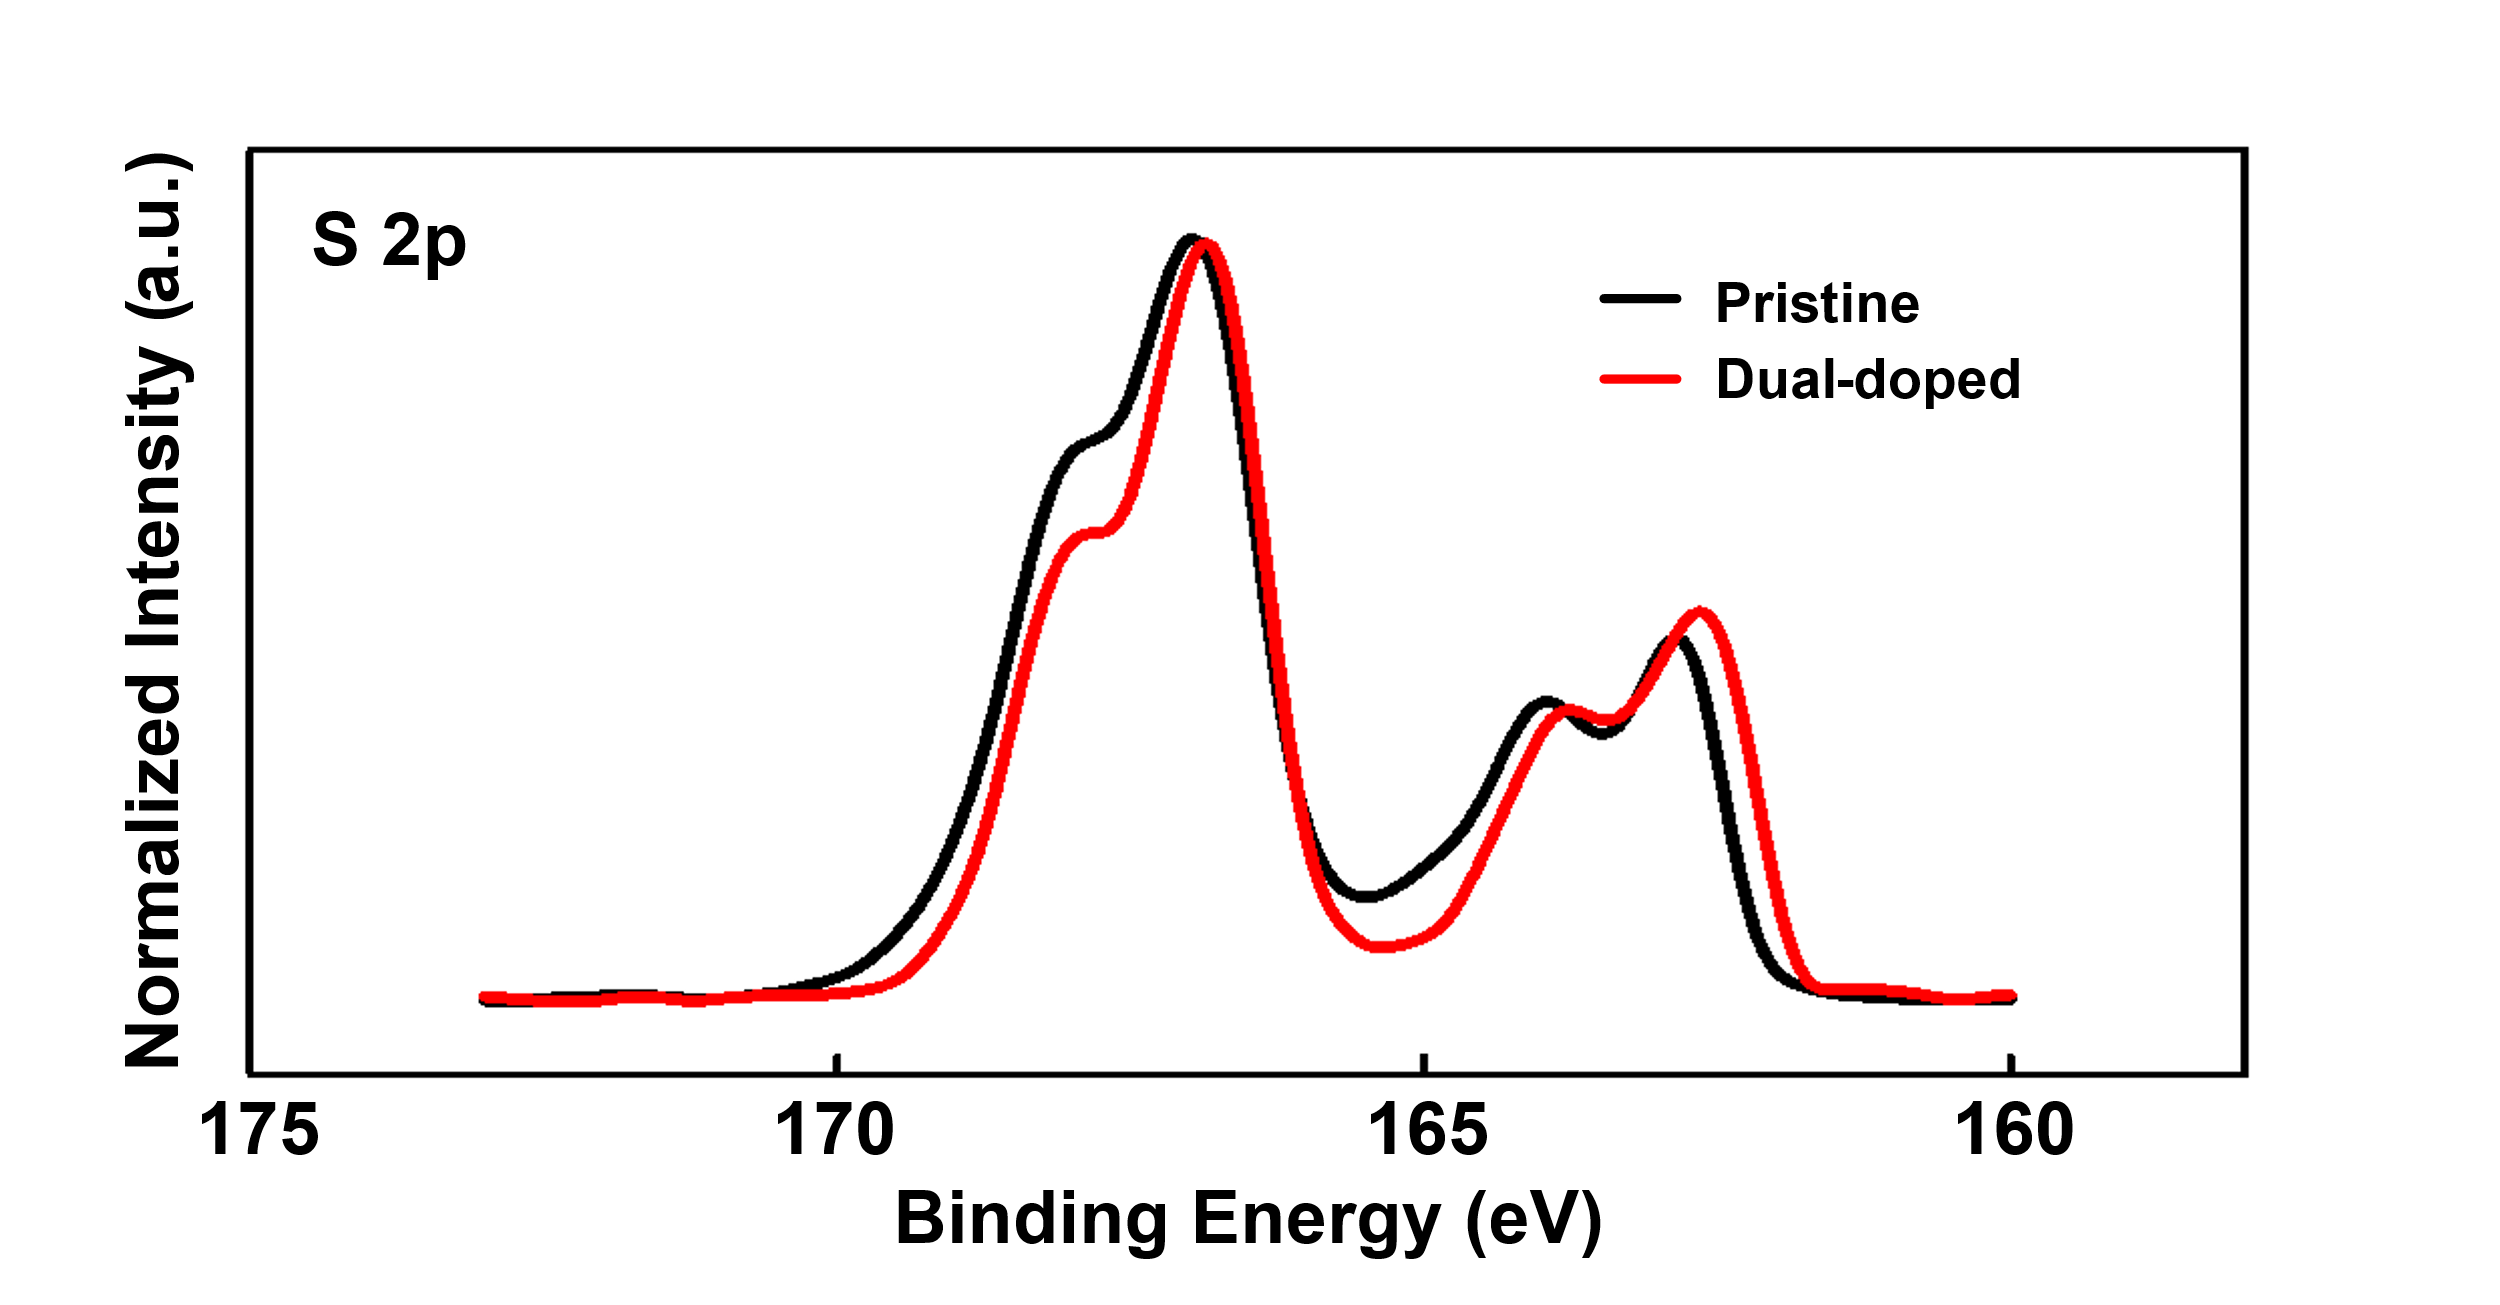
**

**Supplementary Figure 1.** XPS spectra of pristine and dual-doped PEDOT:PSS films.


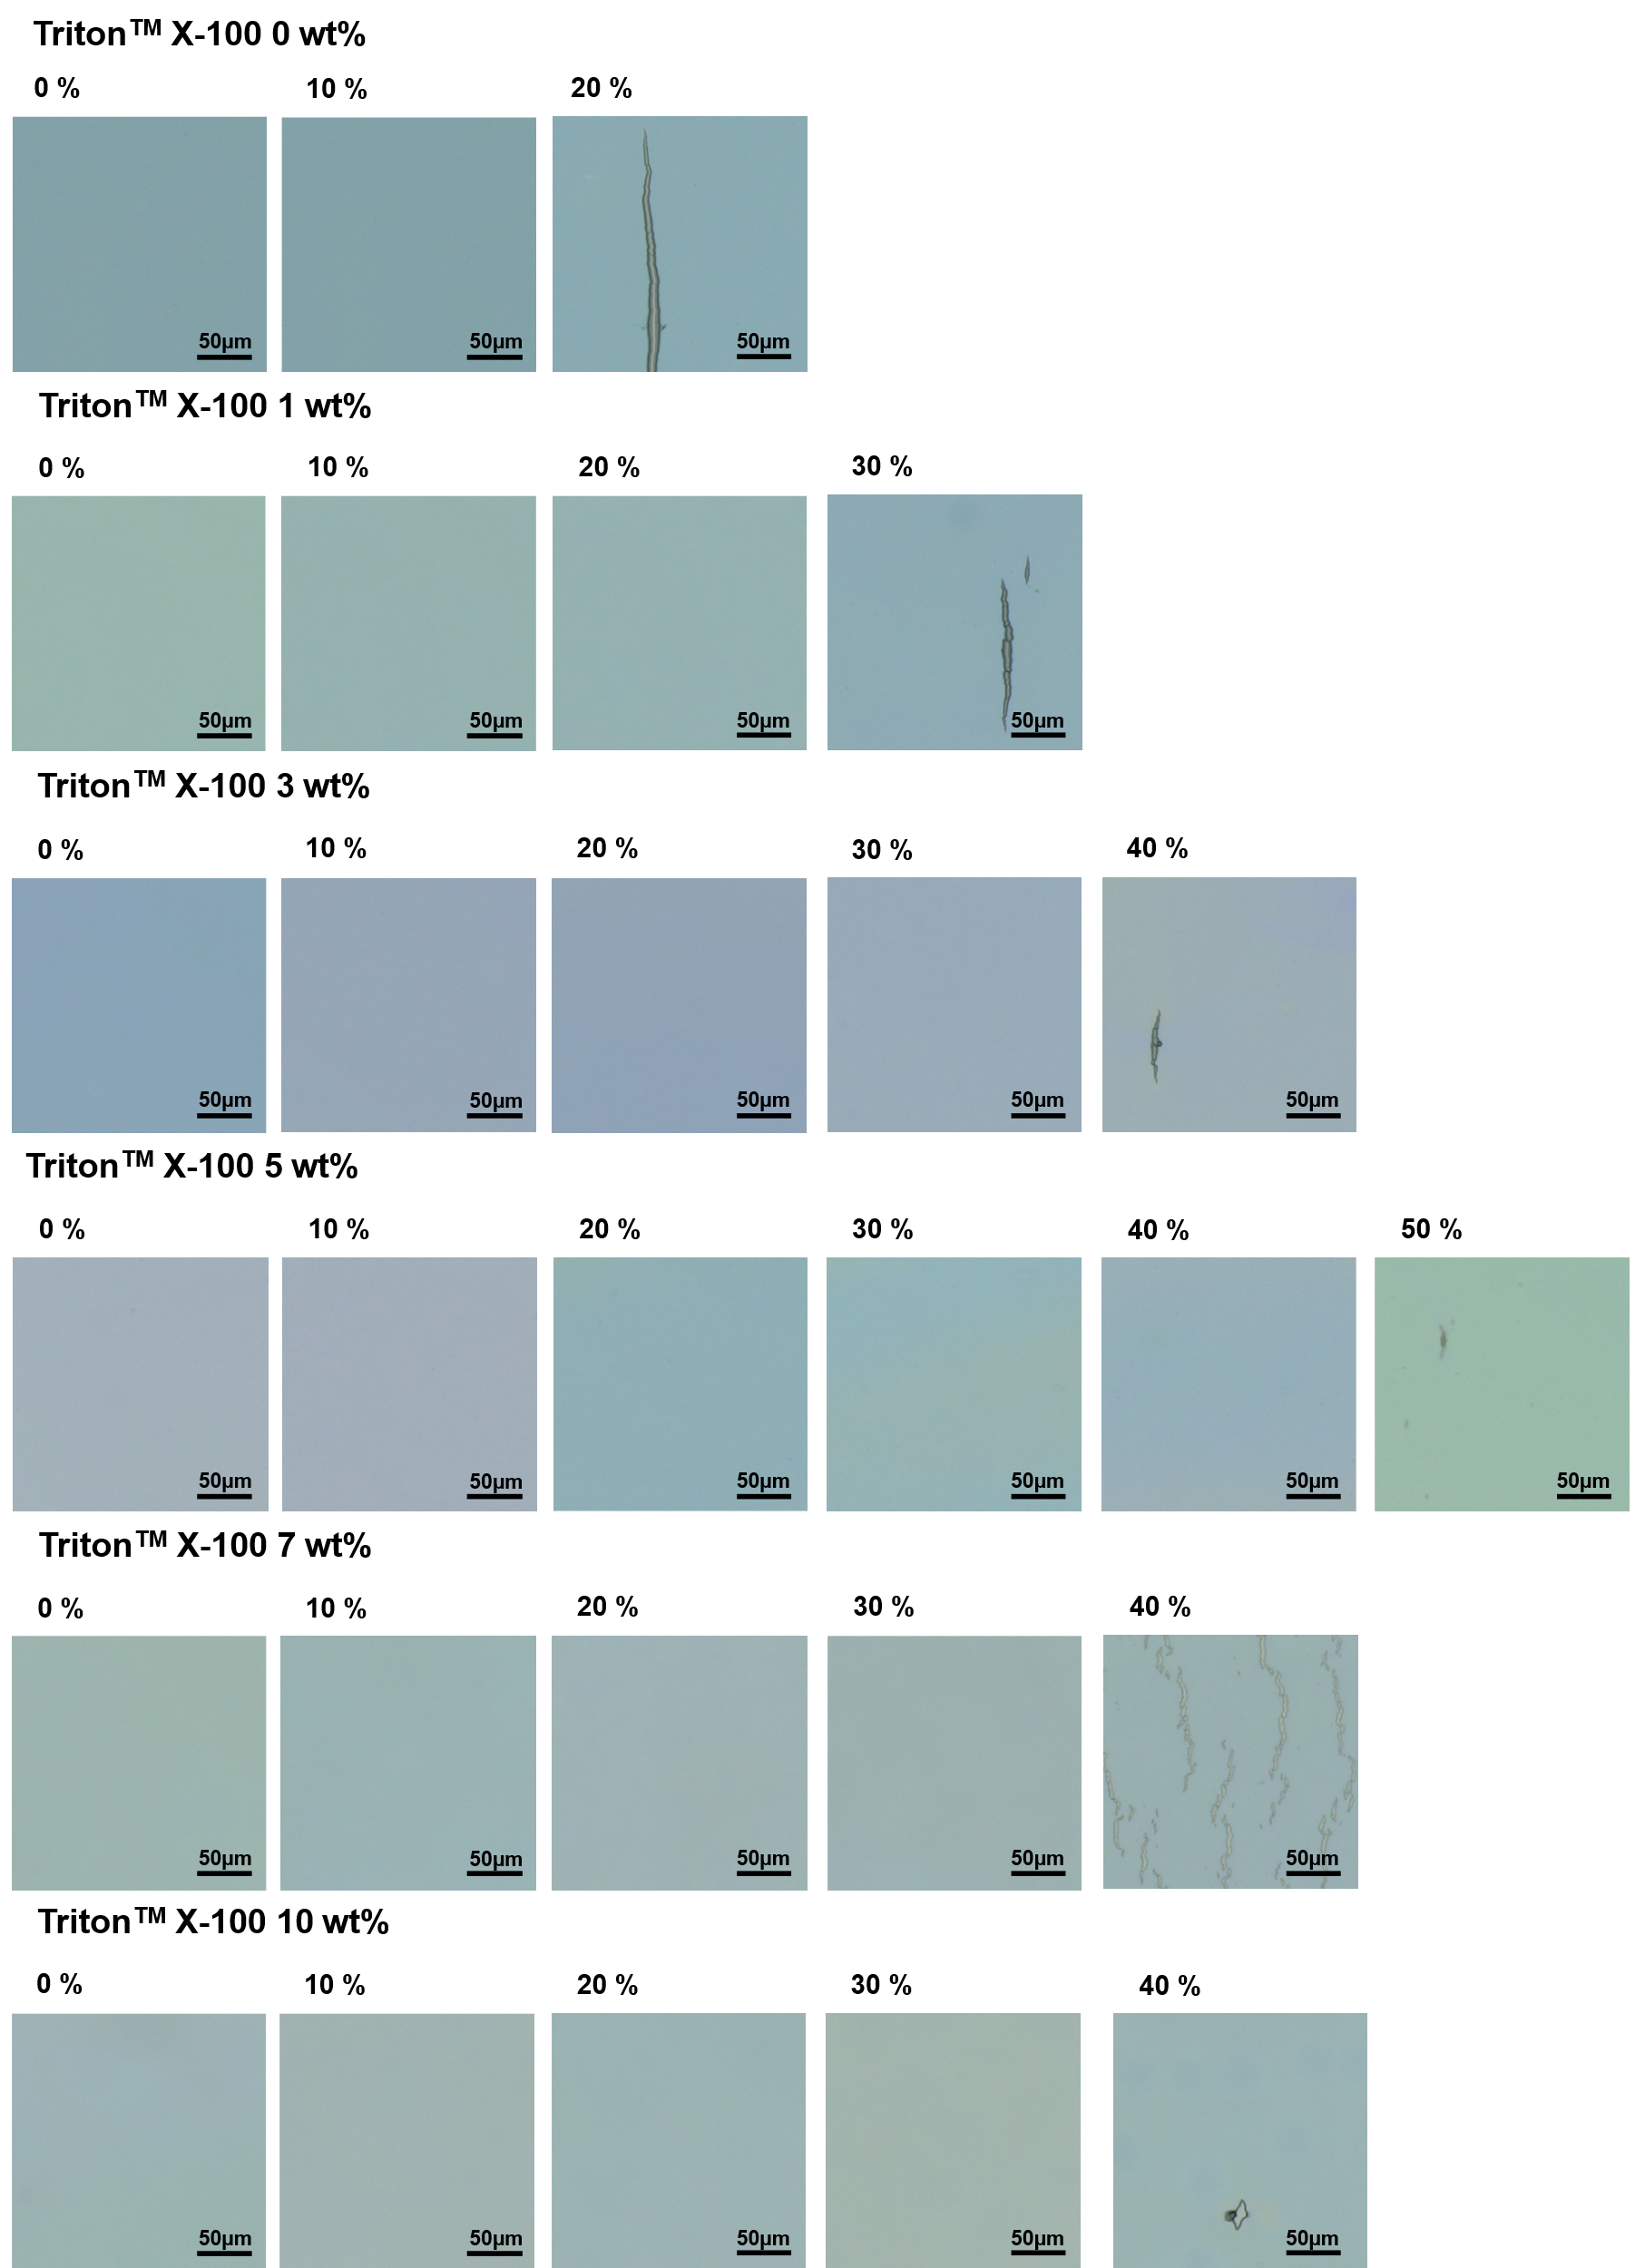


**Supplementary Figure 2**. OM images of PEDOT:PSS composite films doped with different TritonTM X-100 concentrations (0, 1, 3, 5, 7, 10 wt%) under increasing tensile strains.


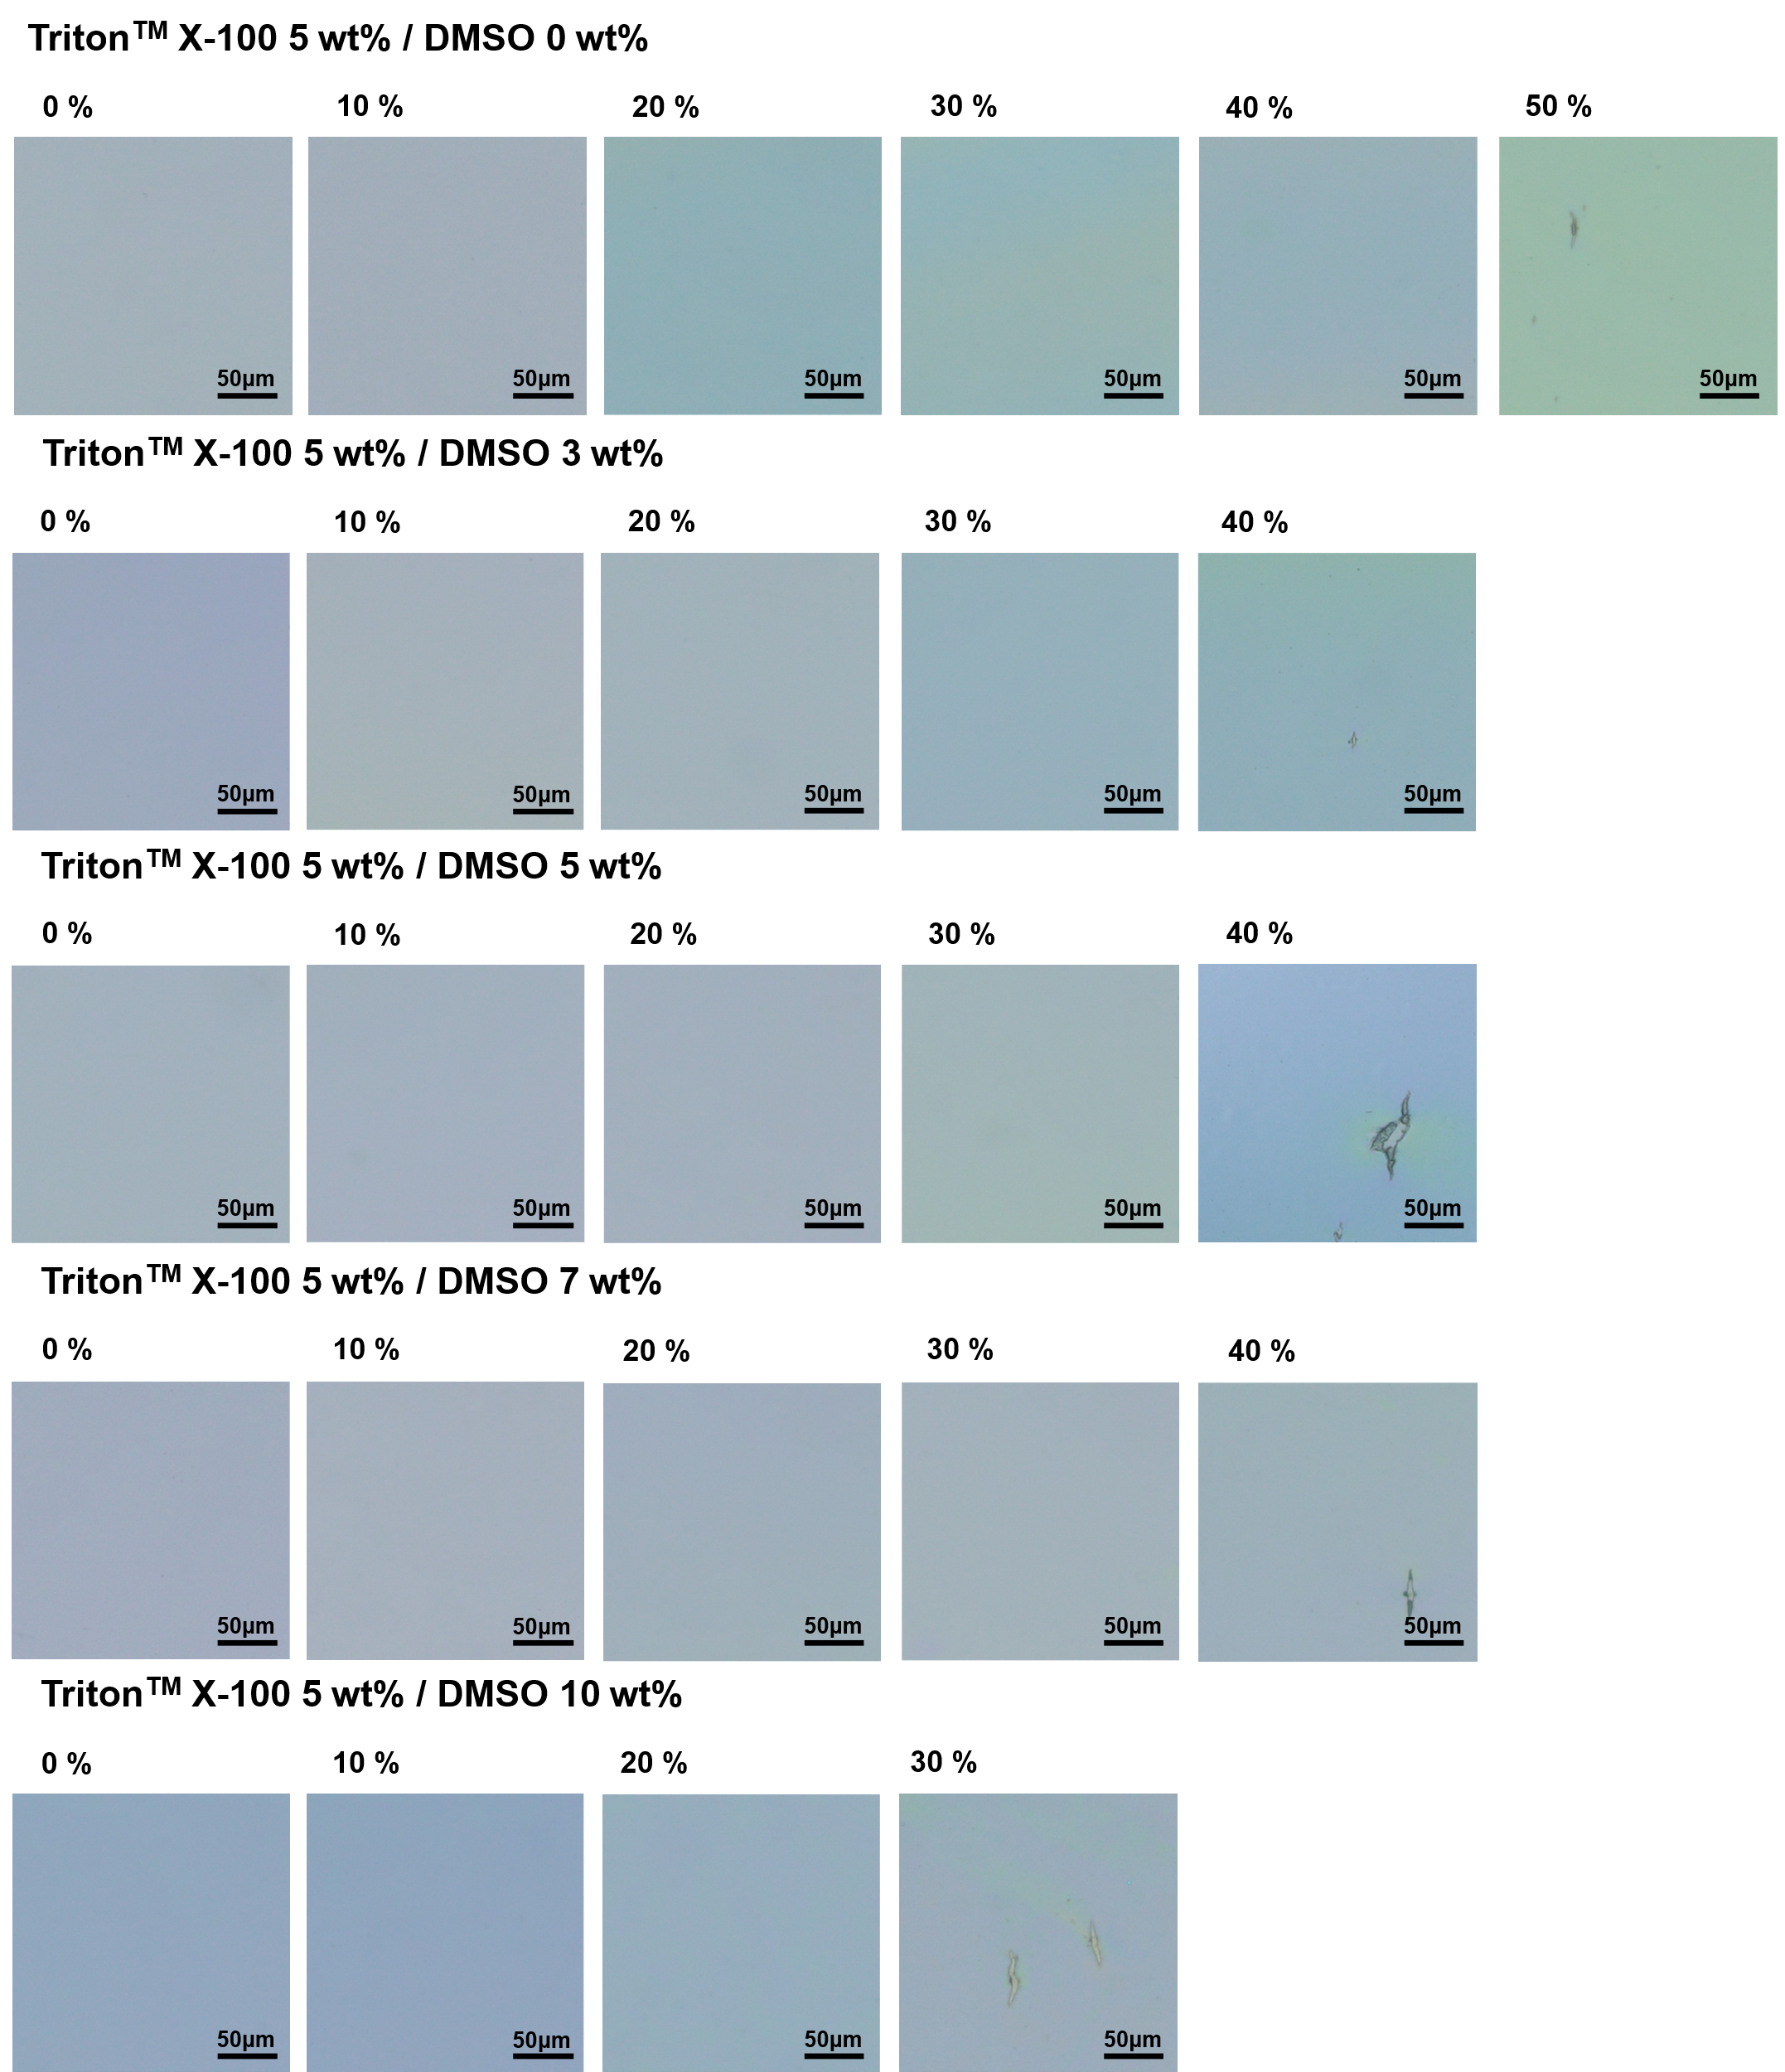


**Supplementary Figure 3**. OM images of PEDOT:PSS composite films doped with 5 wt% TritonTM X-100 and varying concentrations of DMSO (0, 1, 3, 5, 7, and 10 wt%) under increasing tensile strains.


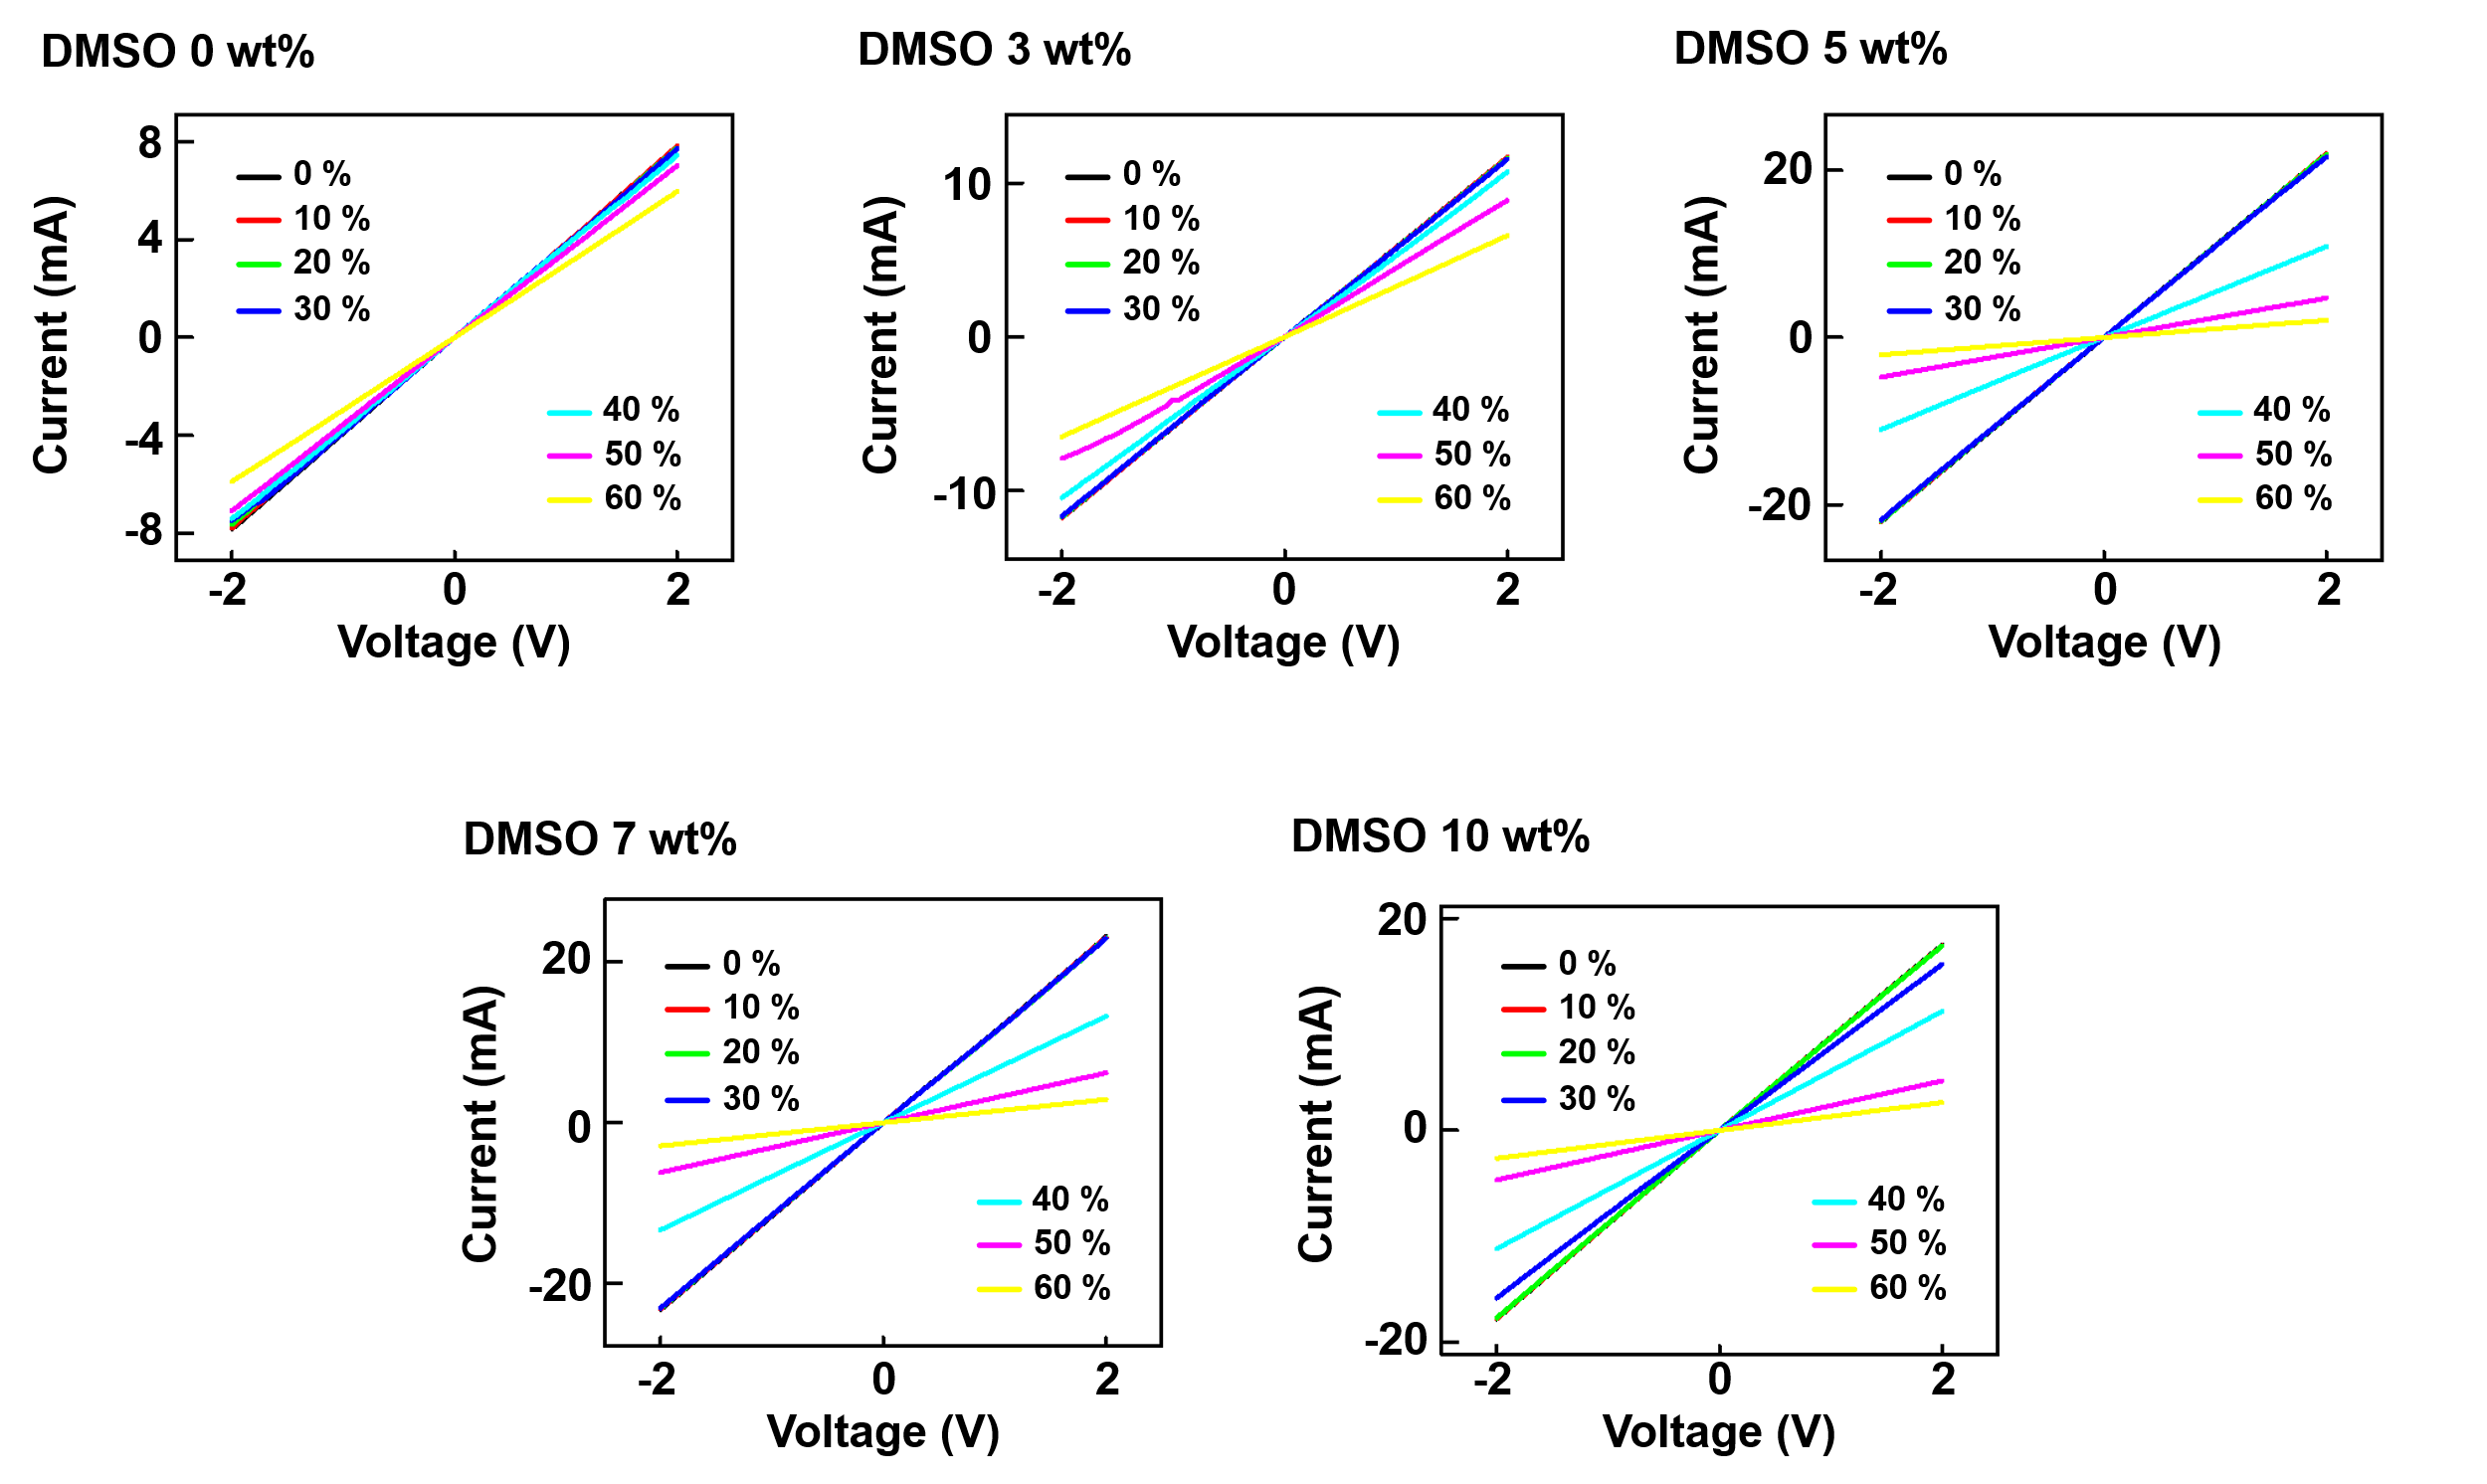


**Supplementary Figure 4**. The I–V characteristics of PEDOT:PSS composite films doped with the various DMSO concentrations (0, 3, 5, 7, and 10 wt%) under tensile strains ranging from 0% to 60%.


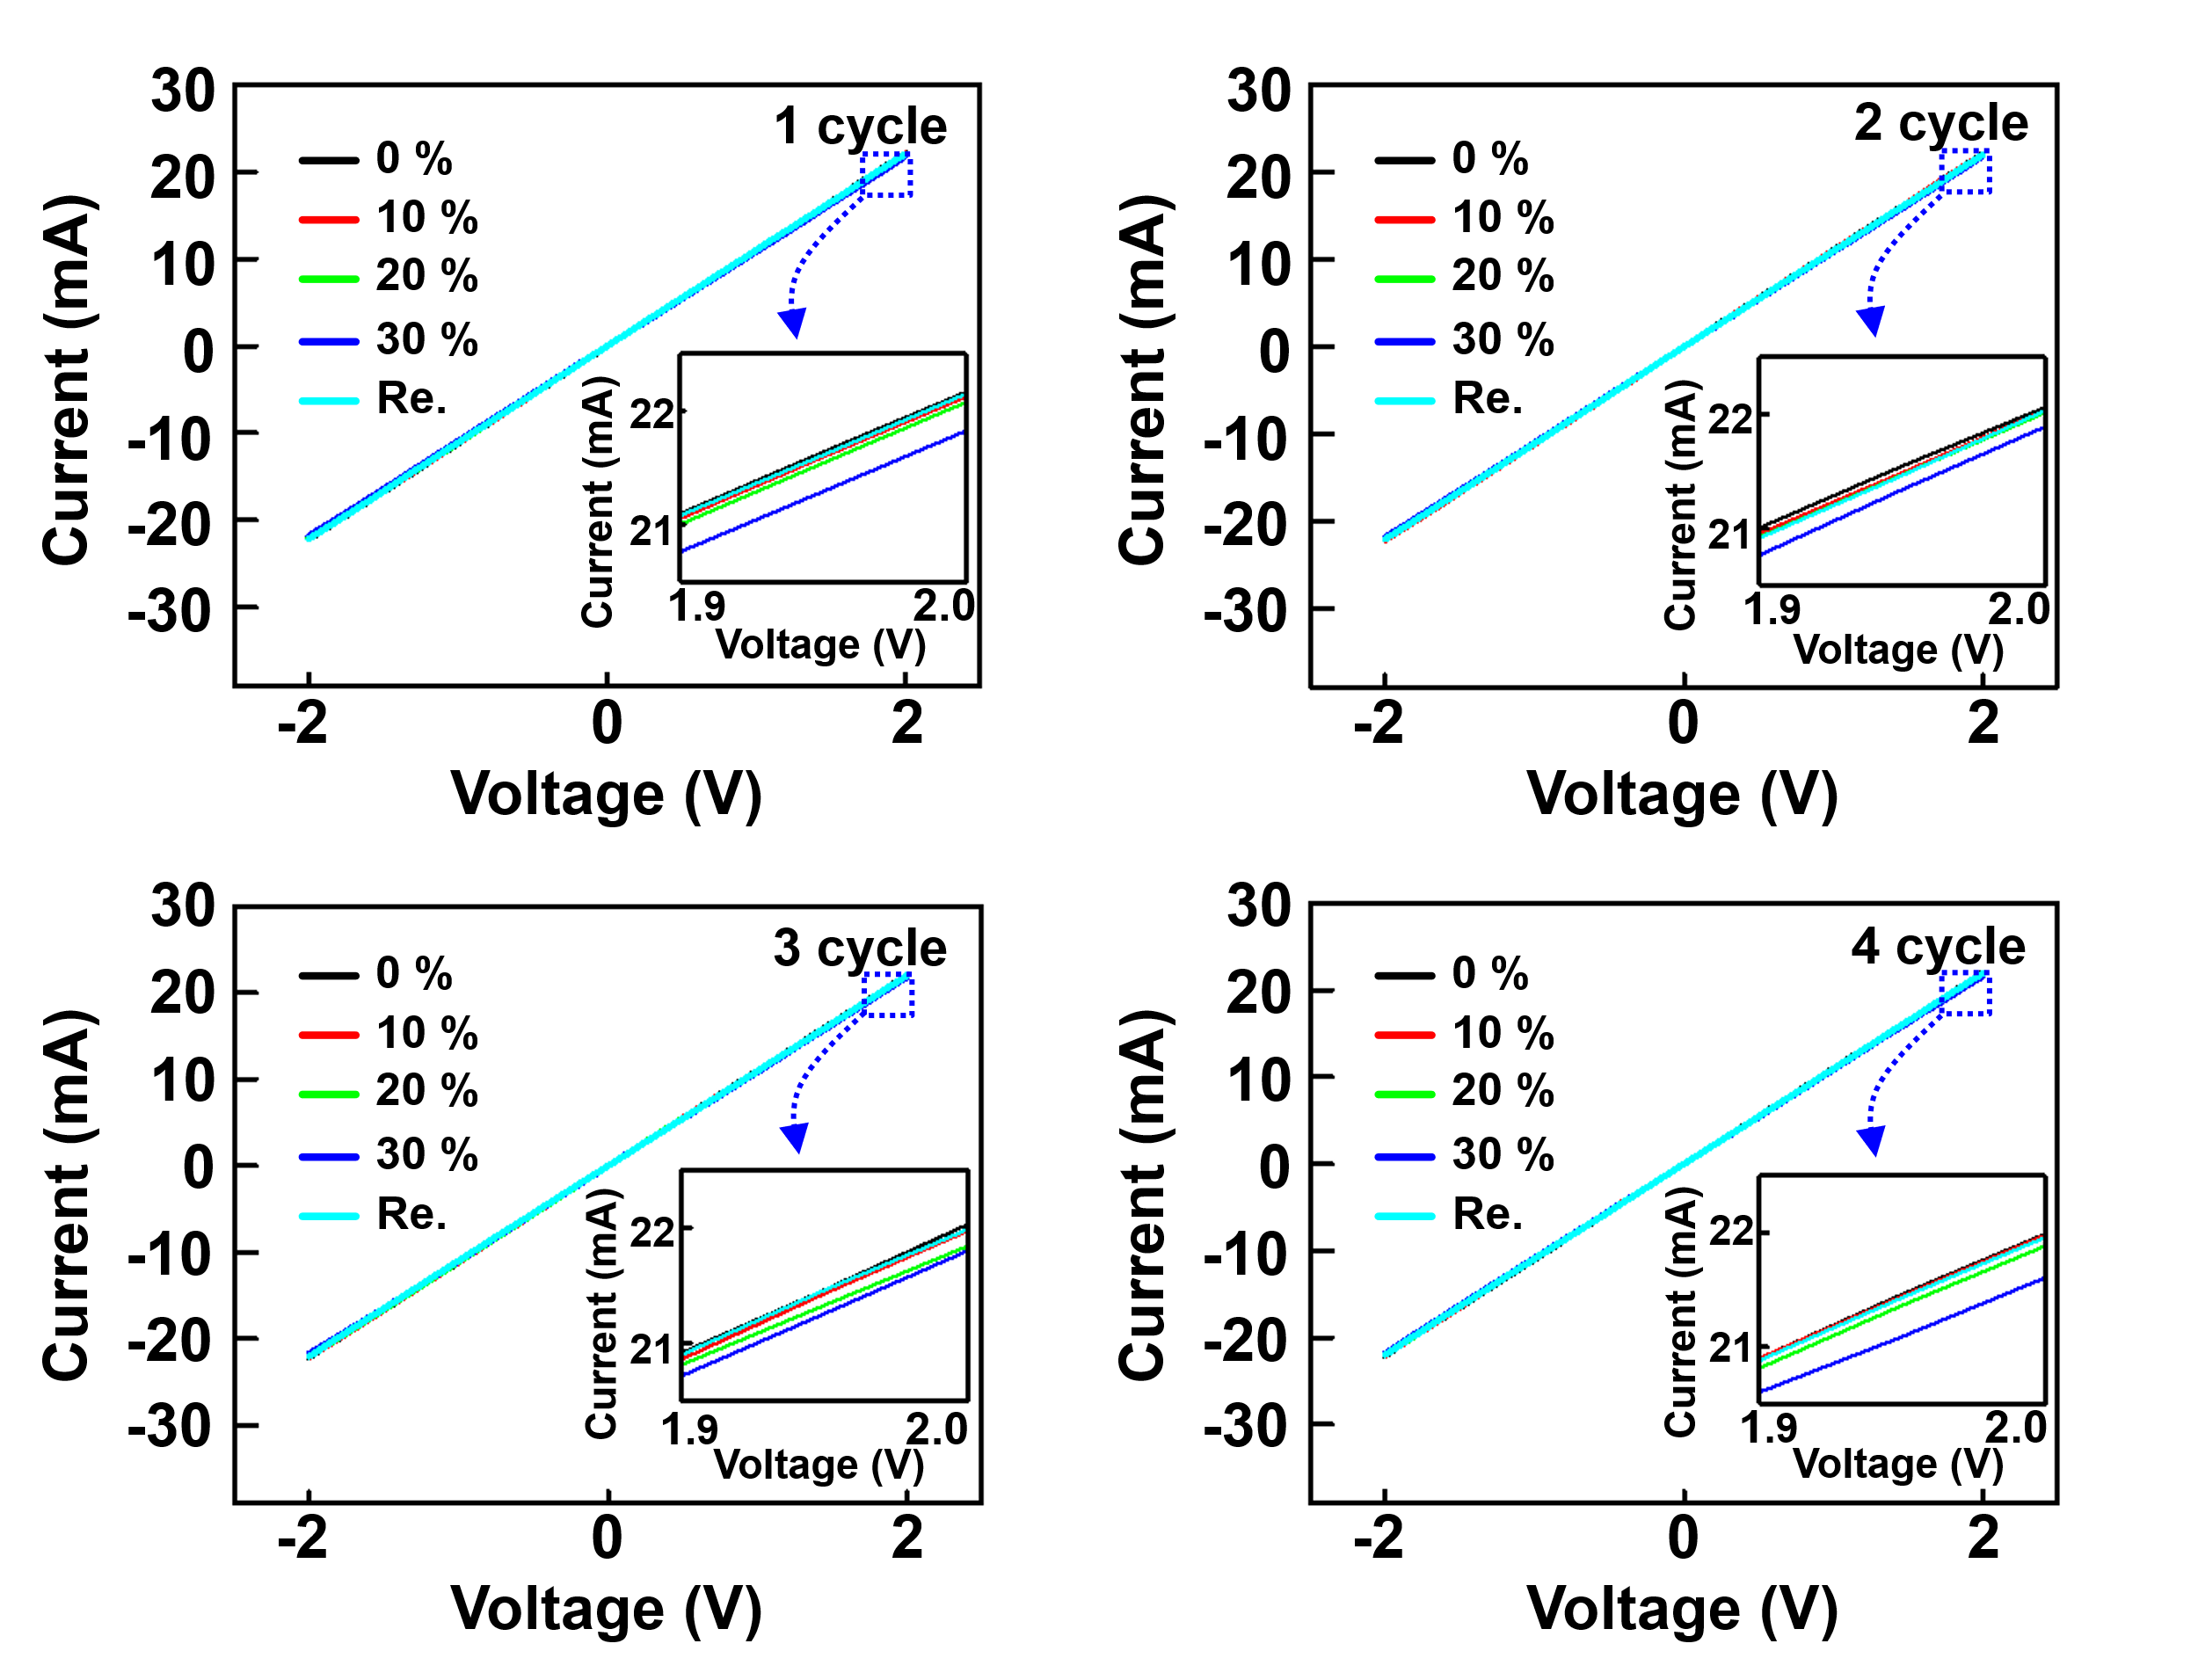


**Supplementary Figure 5**. The I–V characteristics of the PEDOT:PSS composite film over four stretching cycles.


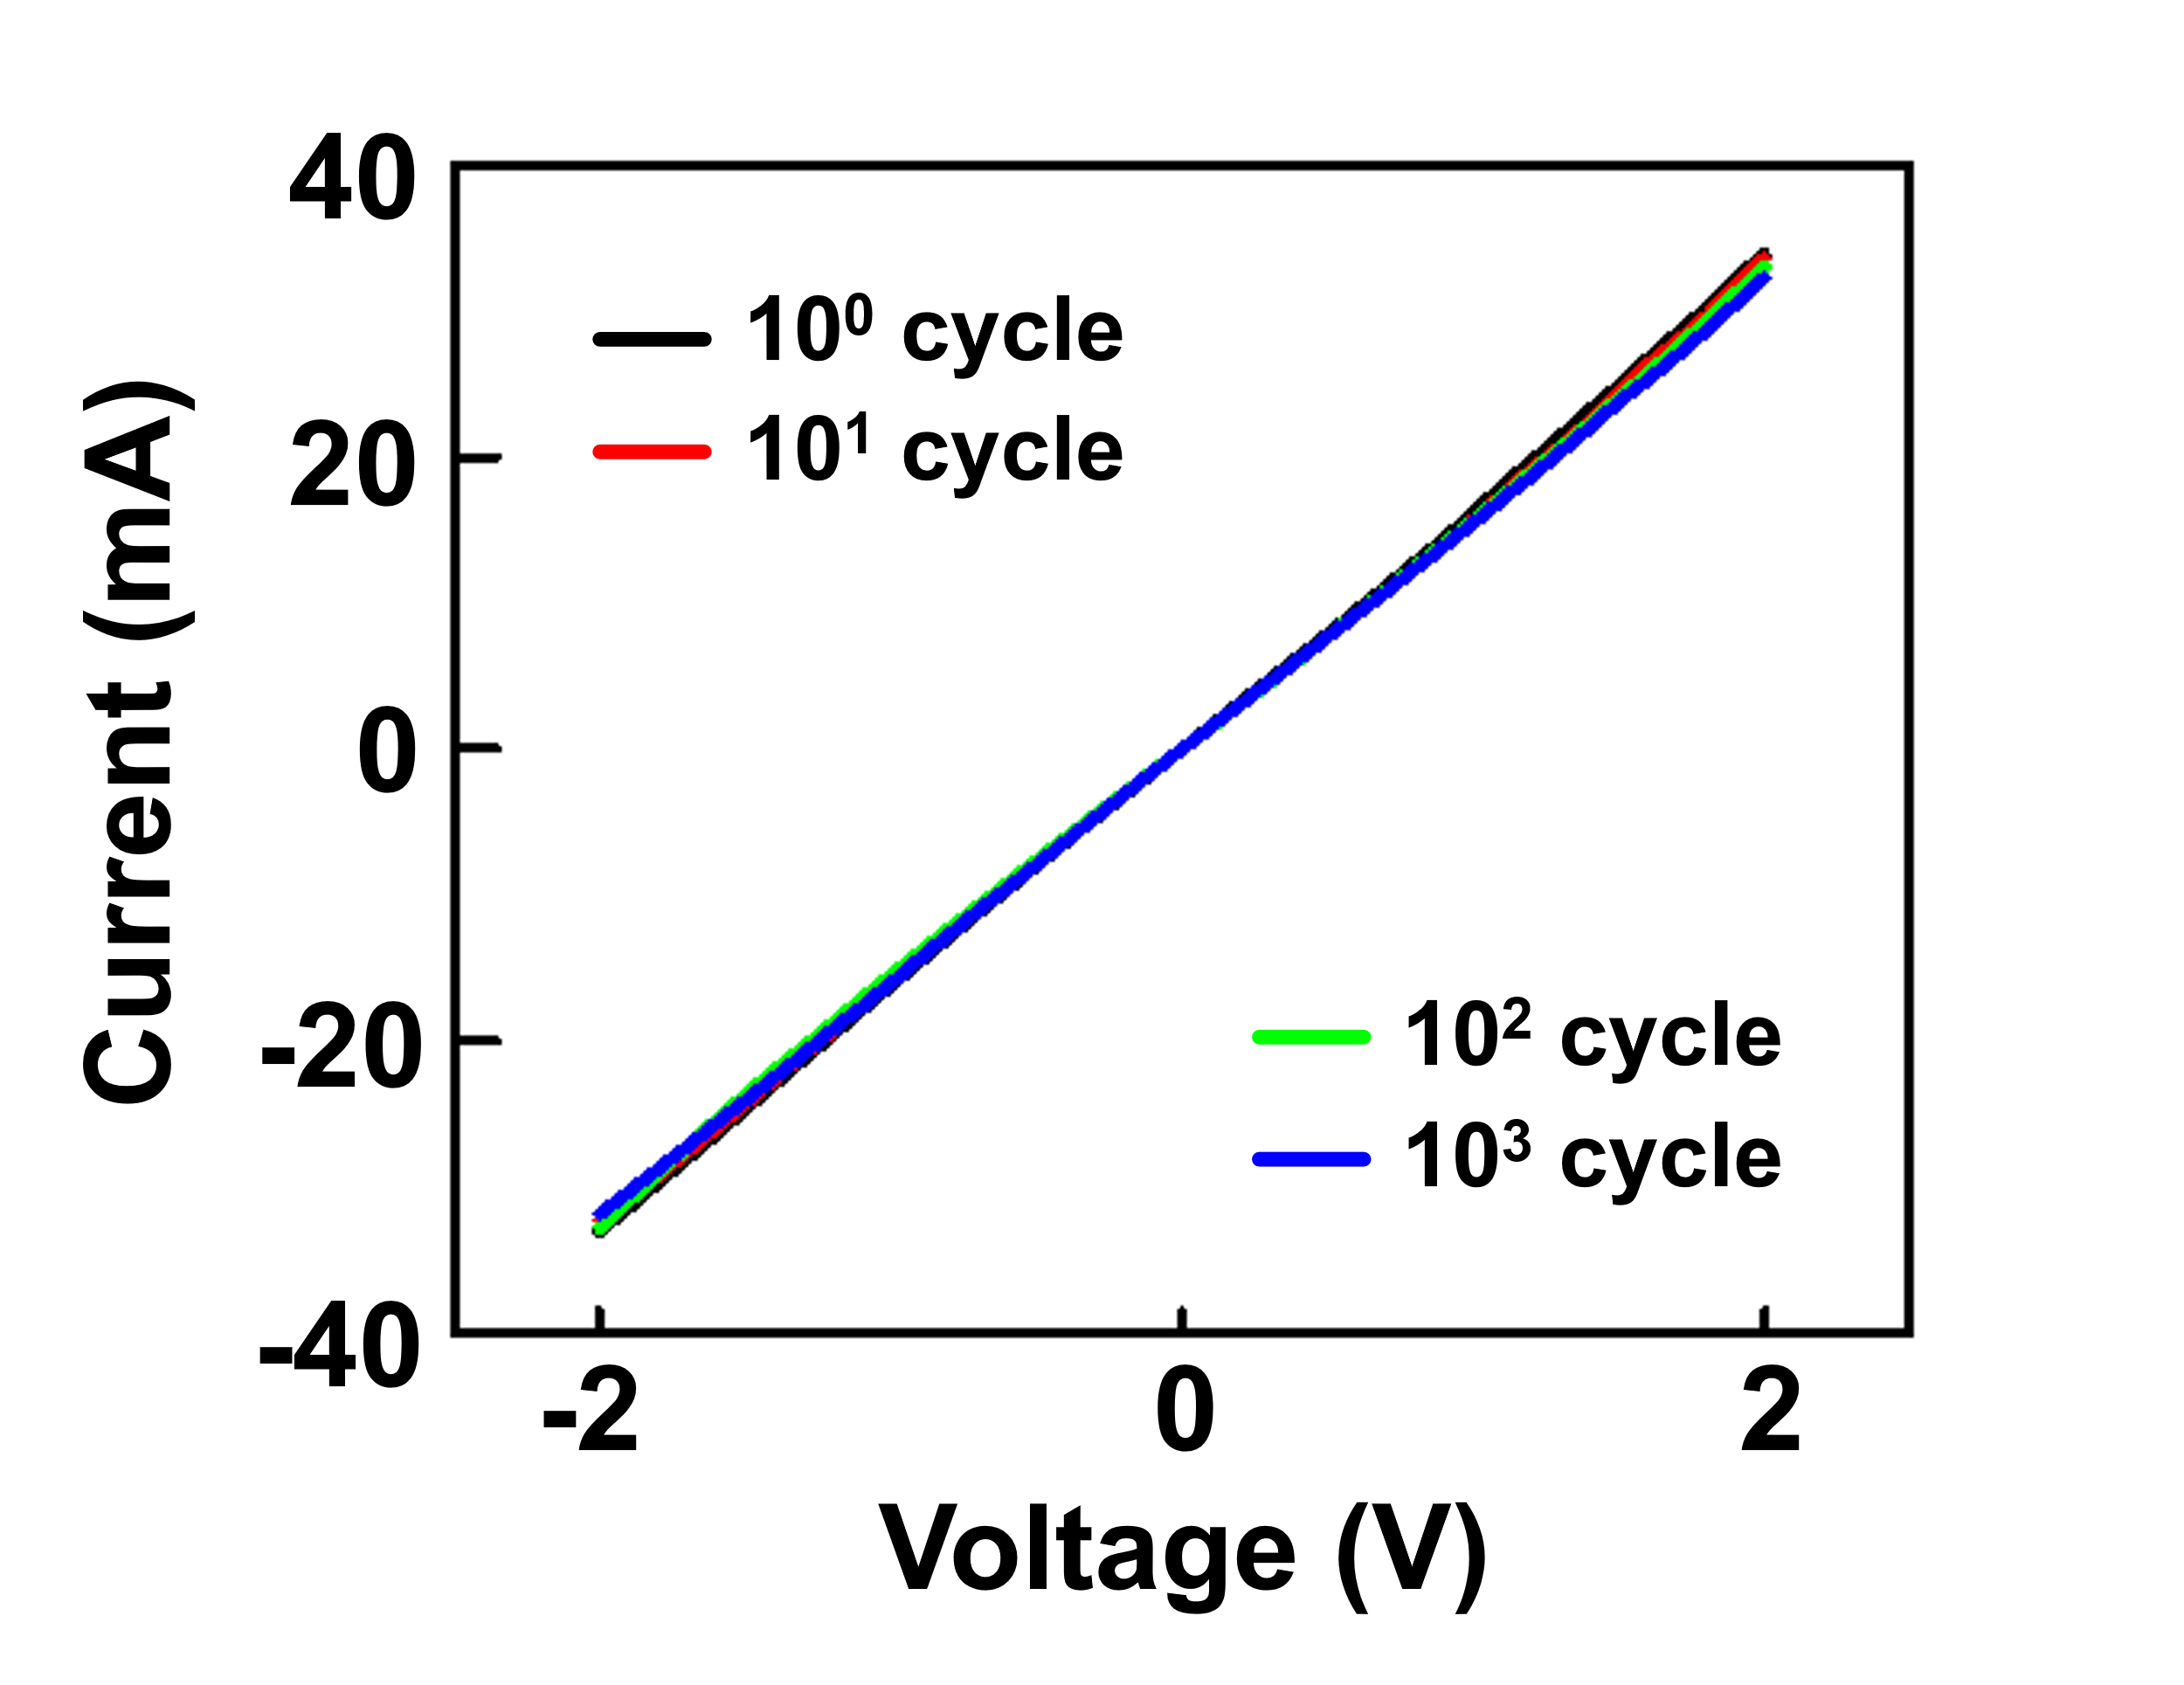


**Supplementary Figure 6**. The I–V characteristics of the PEDOT:PSS composite film measured after 1, 10, 100, and 1000 mechanical cycles under 30% tensile strain.


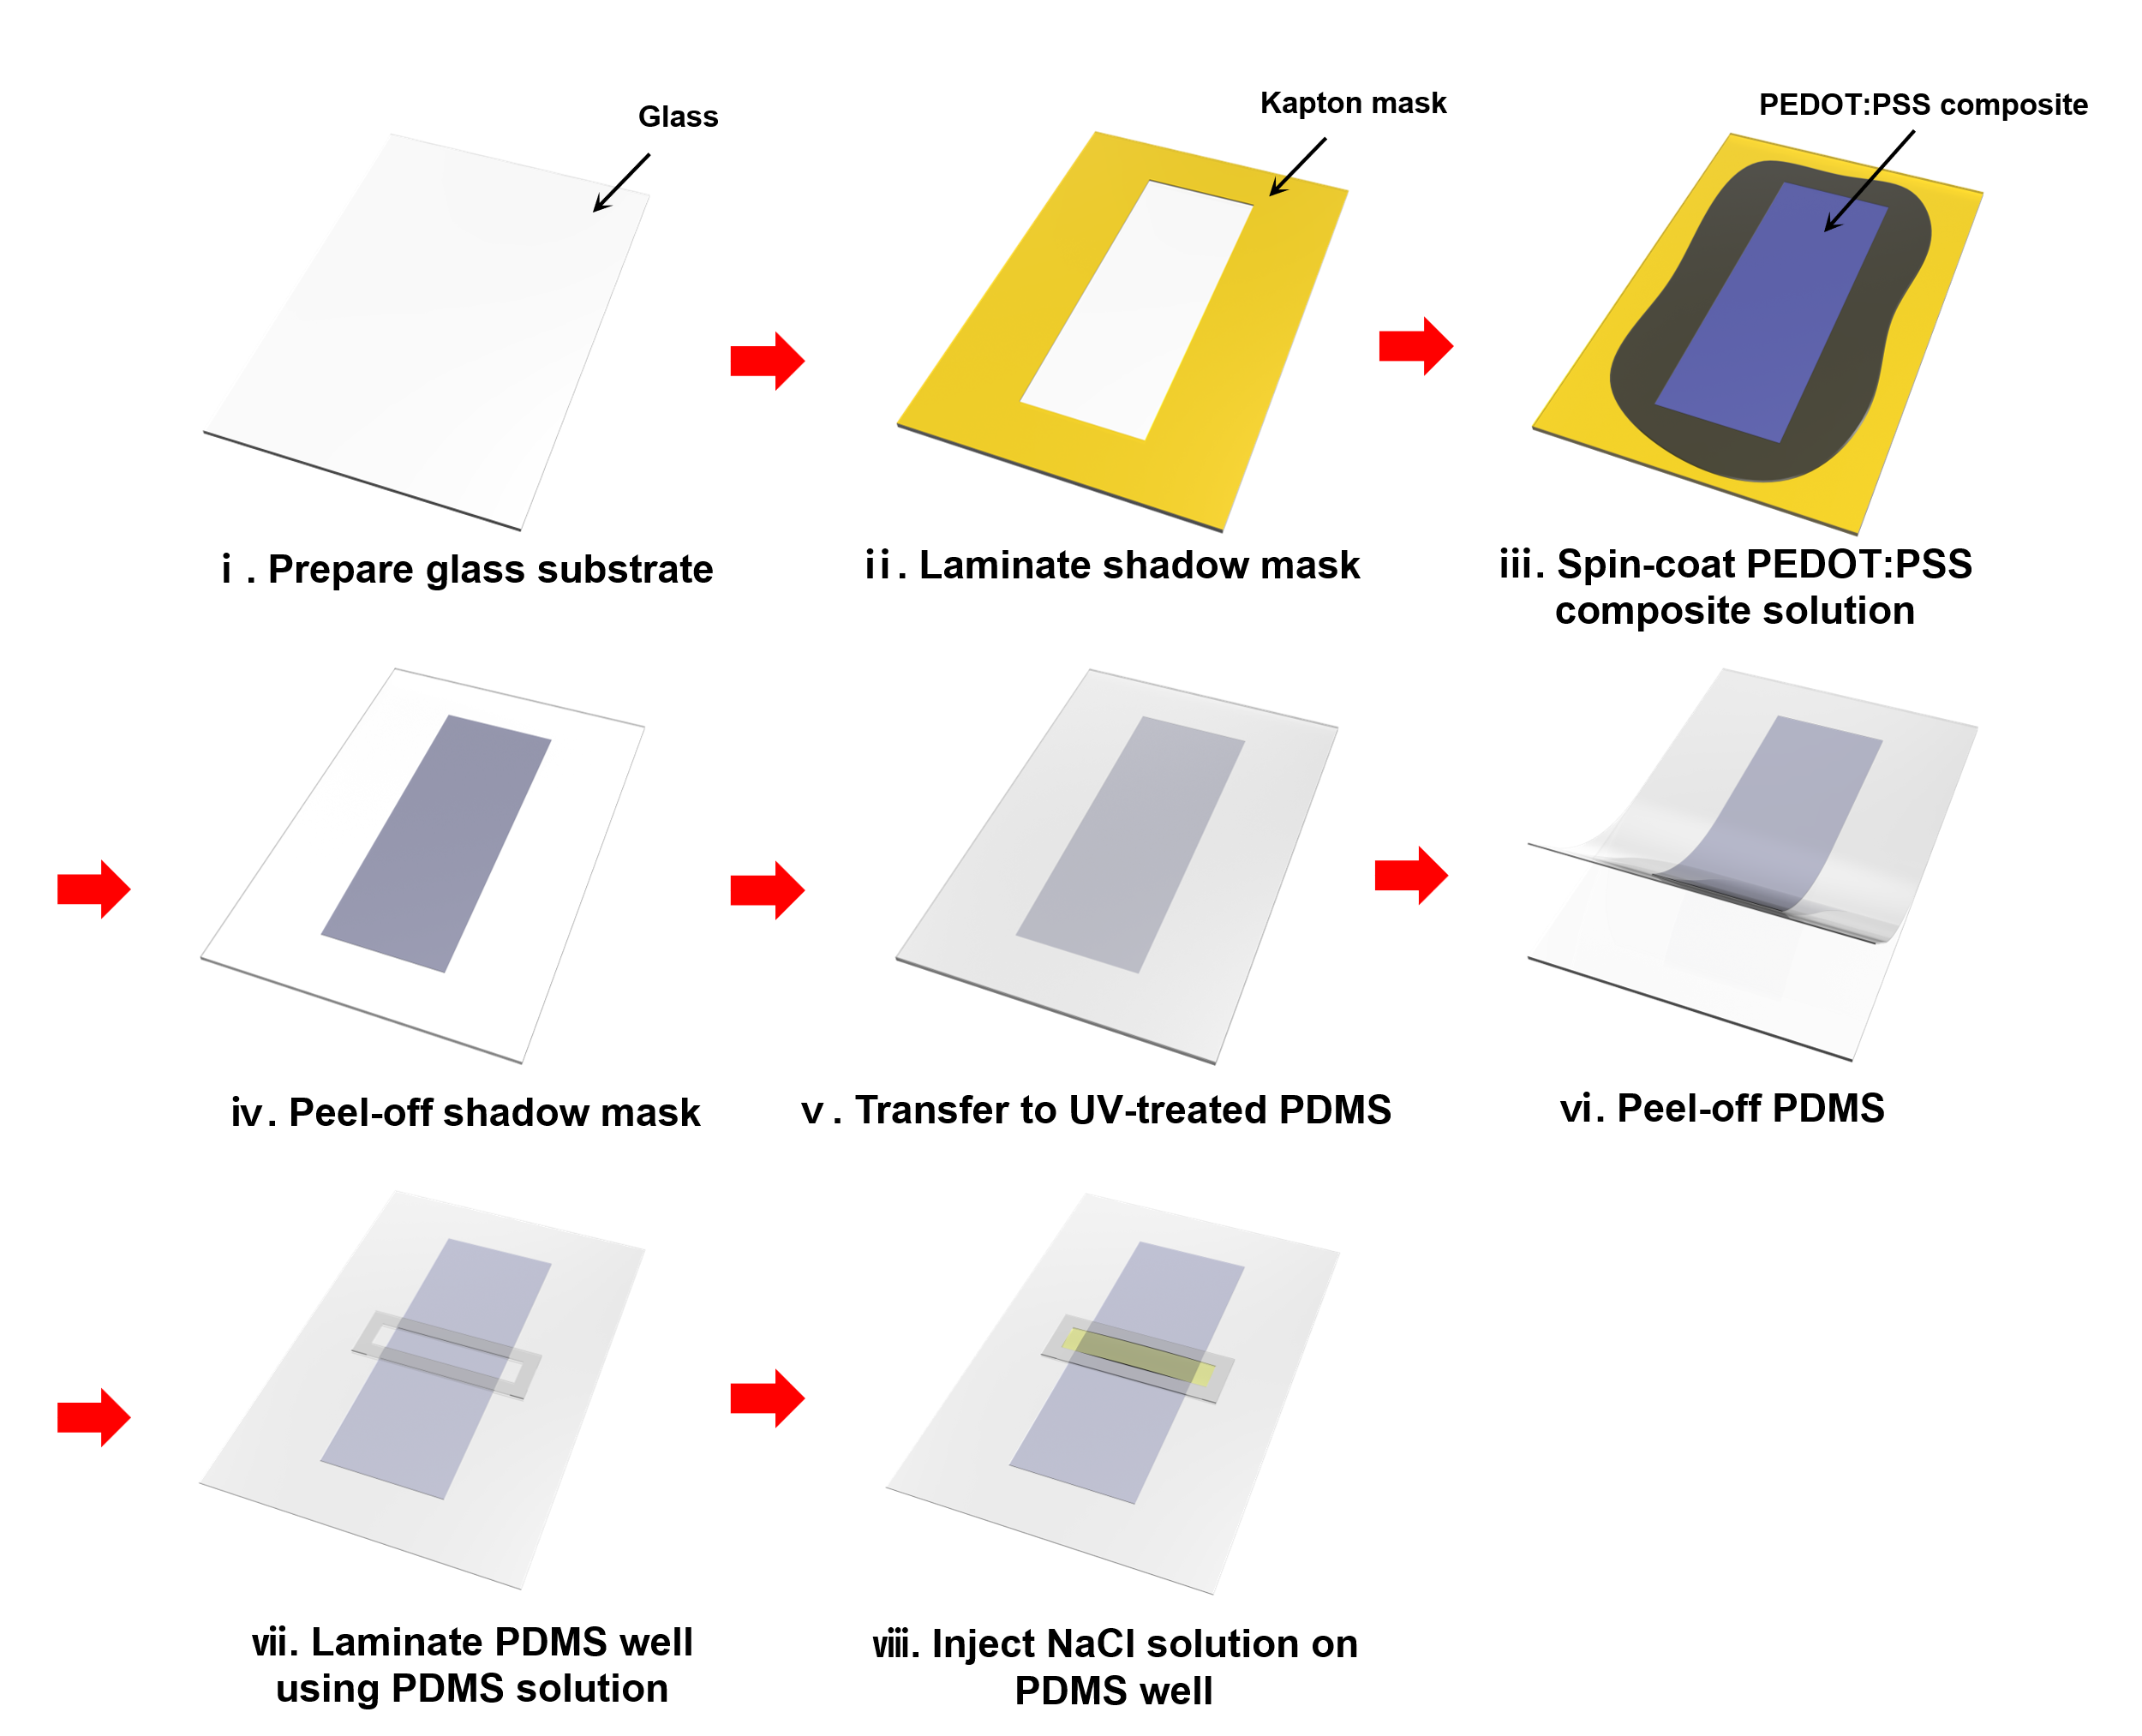


**Supplementary Figure 7**. Schematic fabrication process for the stretchable OECT.


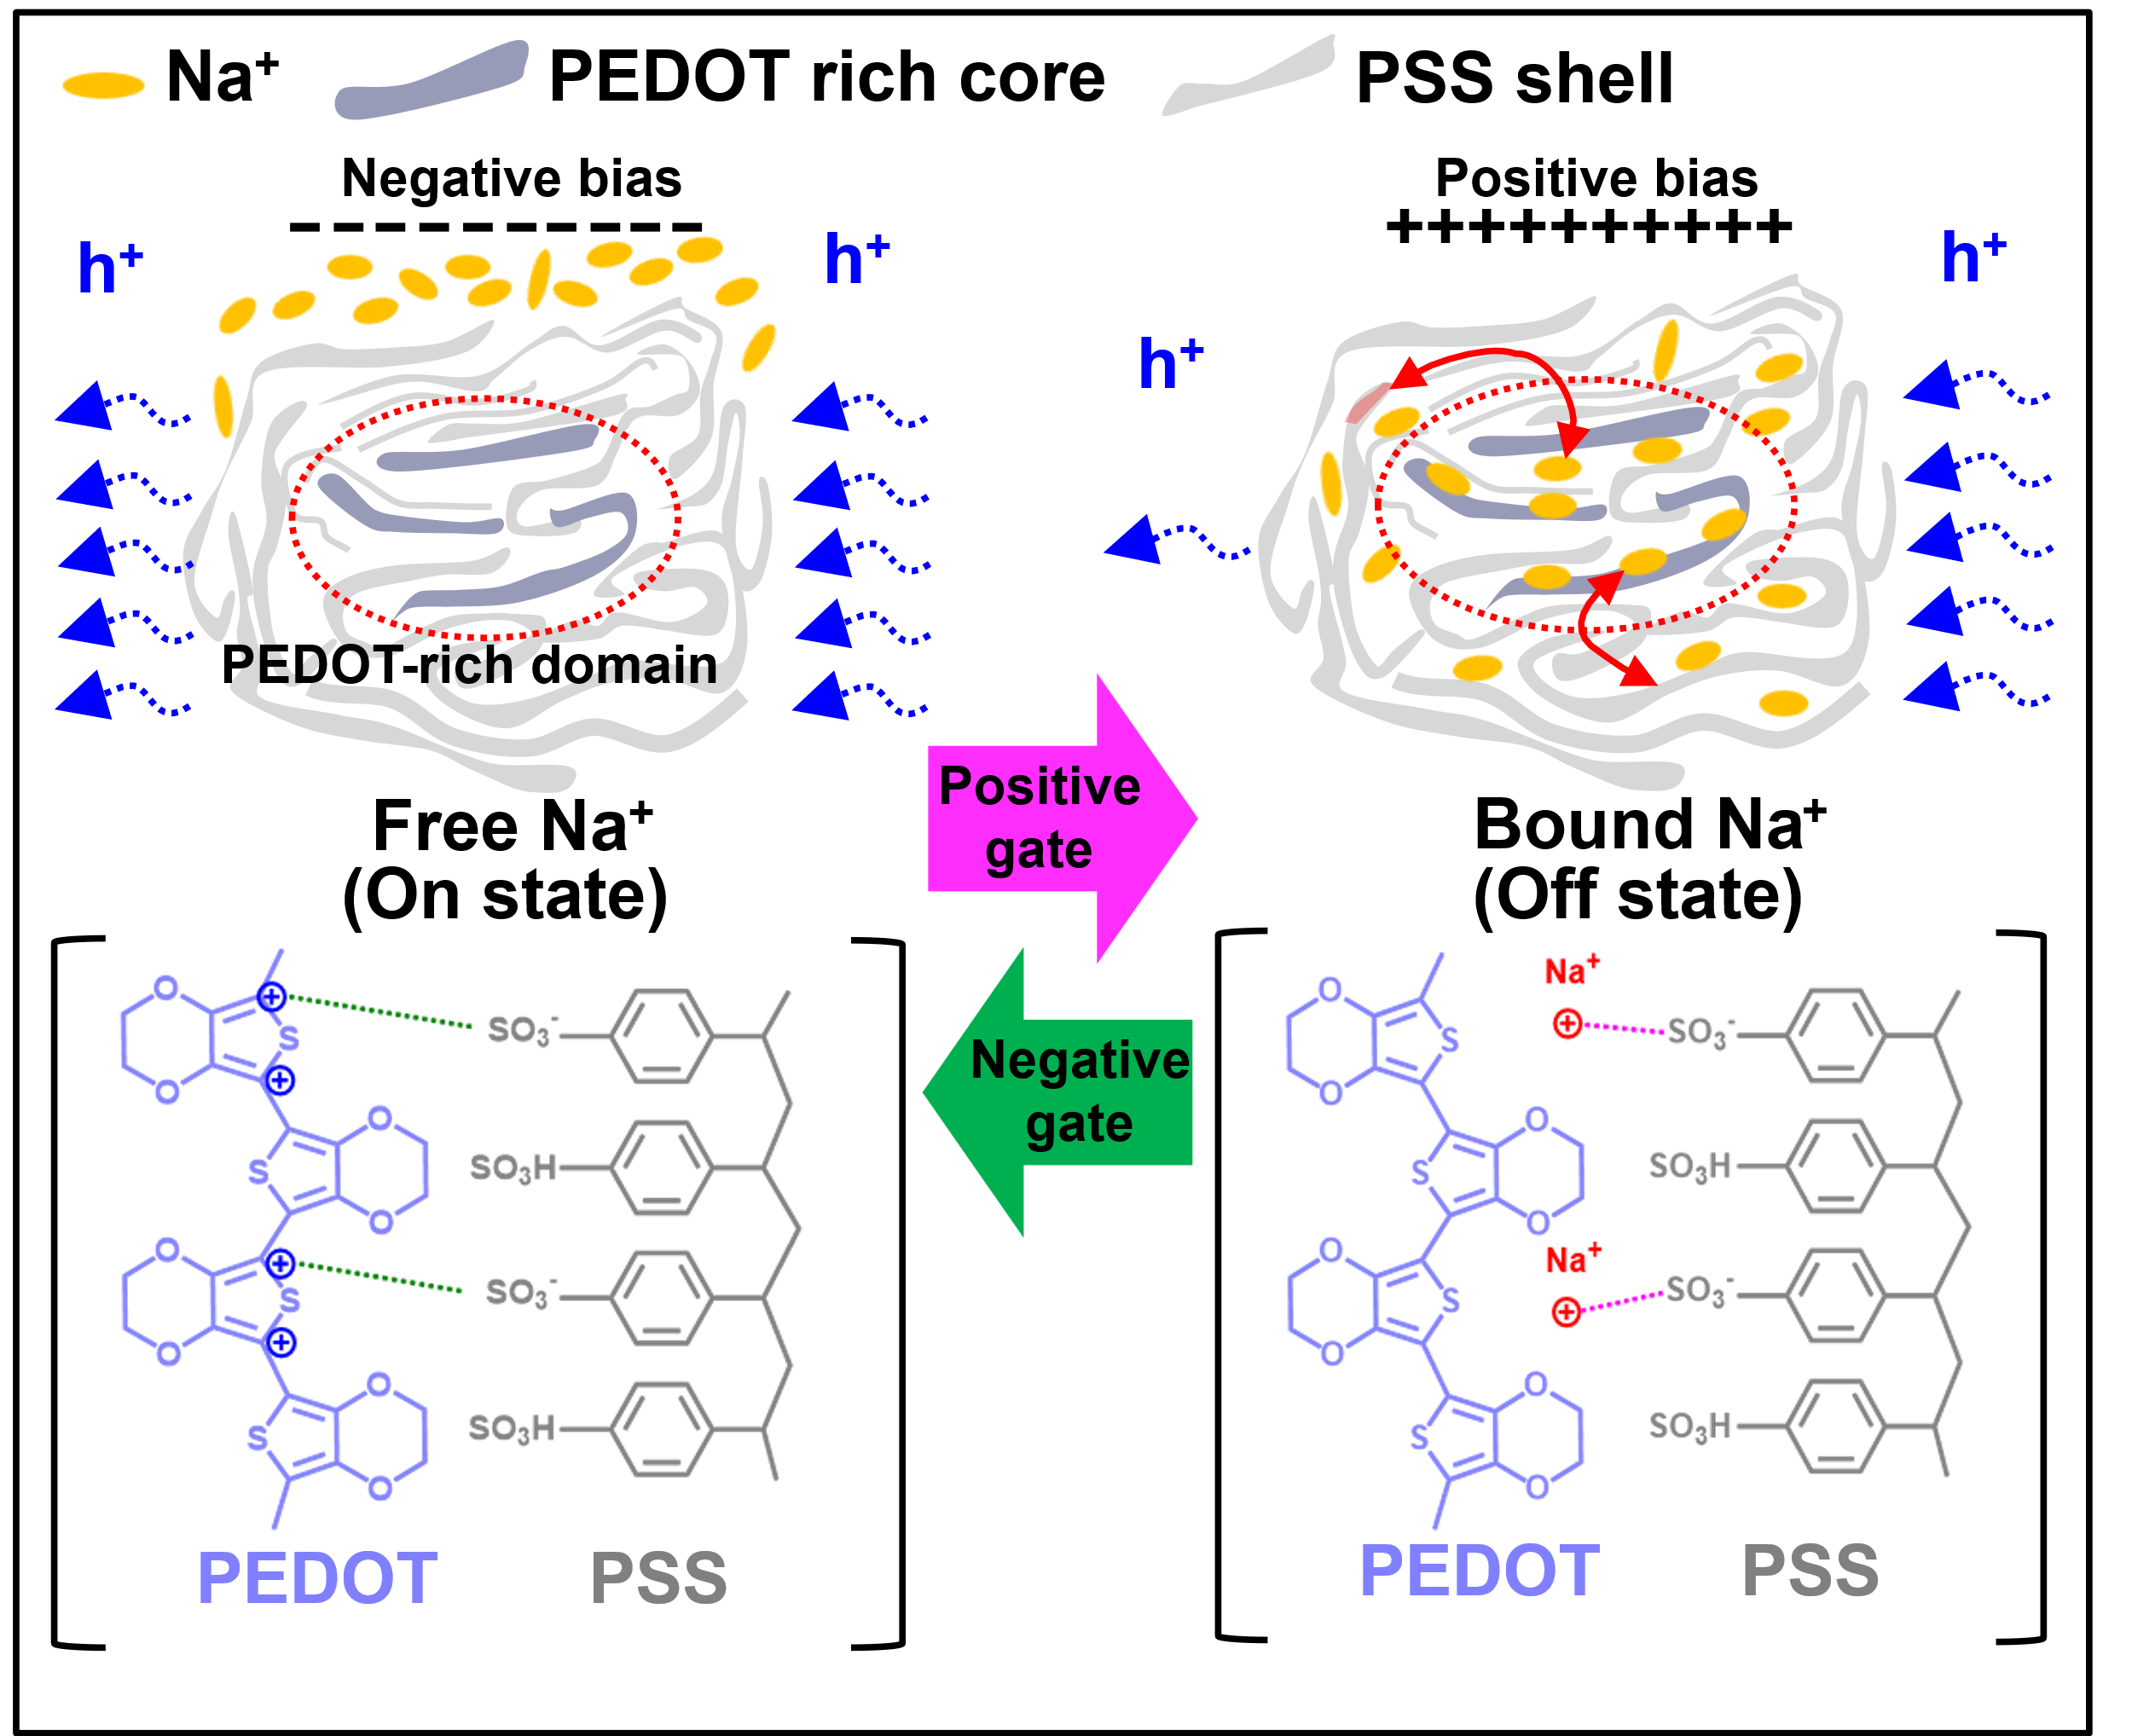


**Supplementary Figure 8.** Schematic illustration of the gate-voltage-induced doping and dedoping mechanism in PEDOT:PSS composite channel.


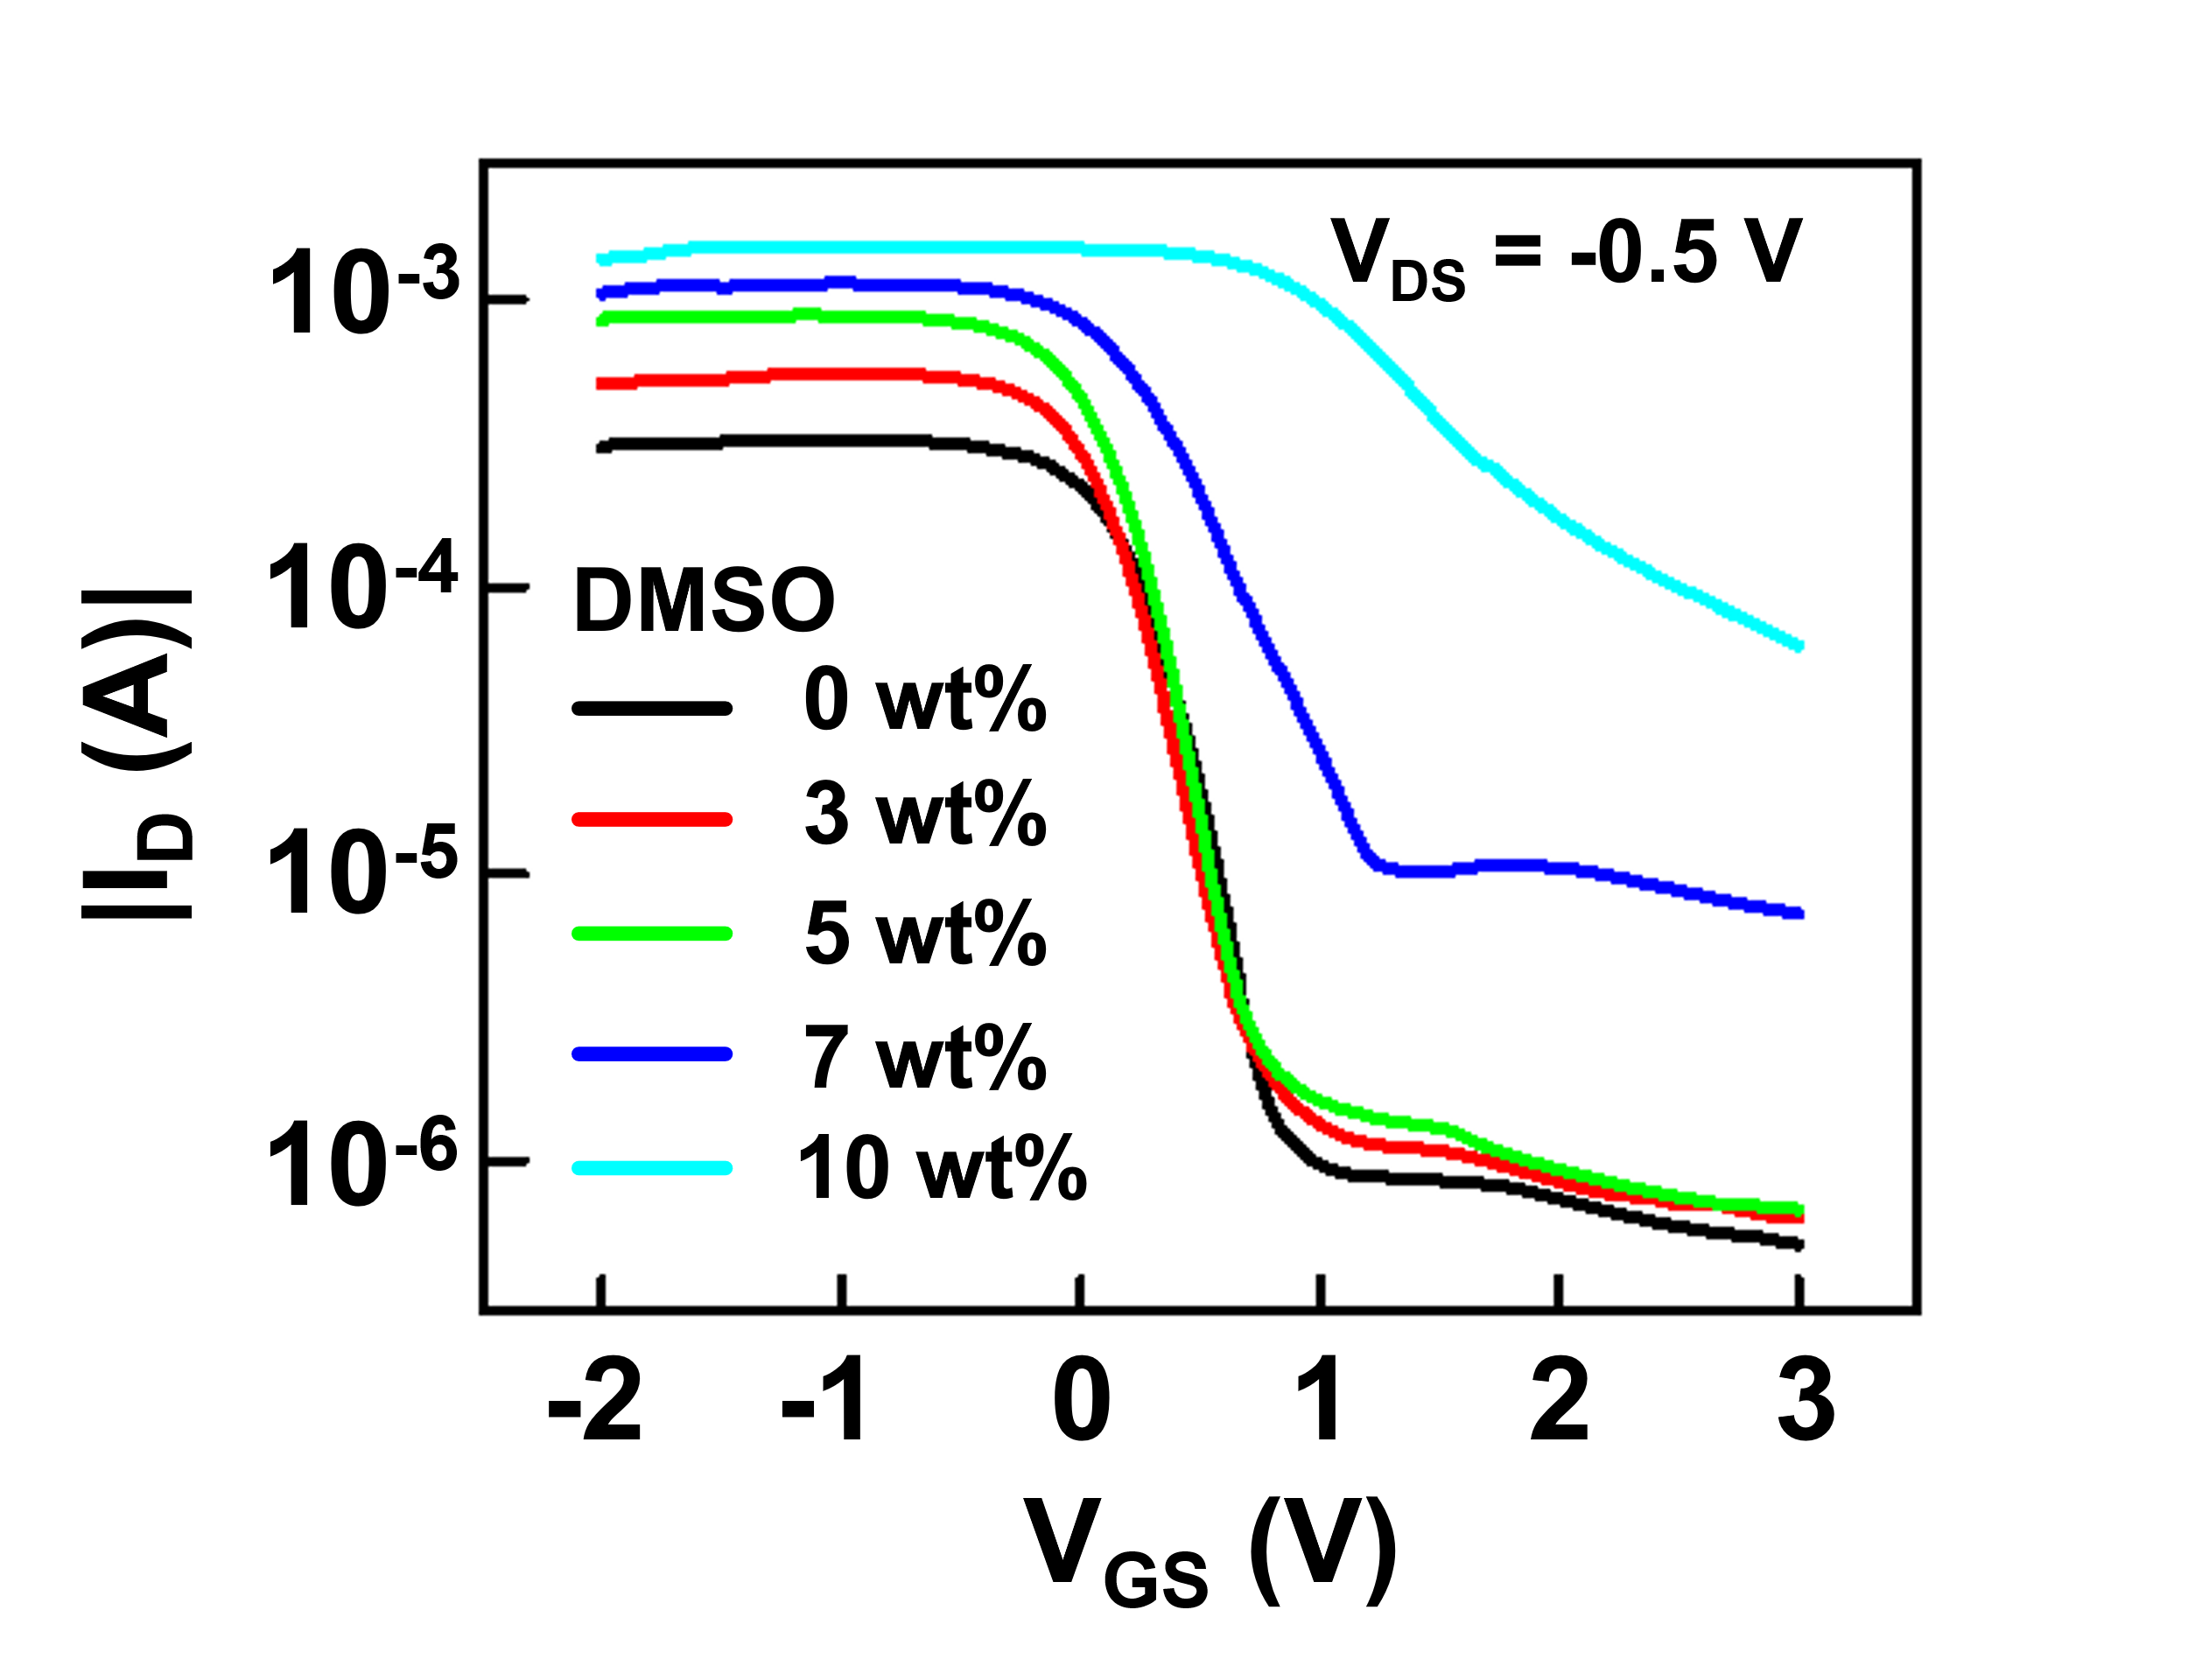


**Supplementary Figure 9.** Transfer characteristics of OECTs incorporating PEDOT:PSS composites with varying DMSO doping concentrations (0, 3, 5, 7, and 10 wt%).


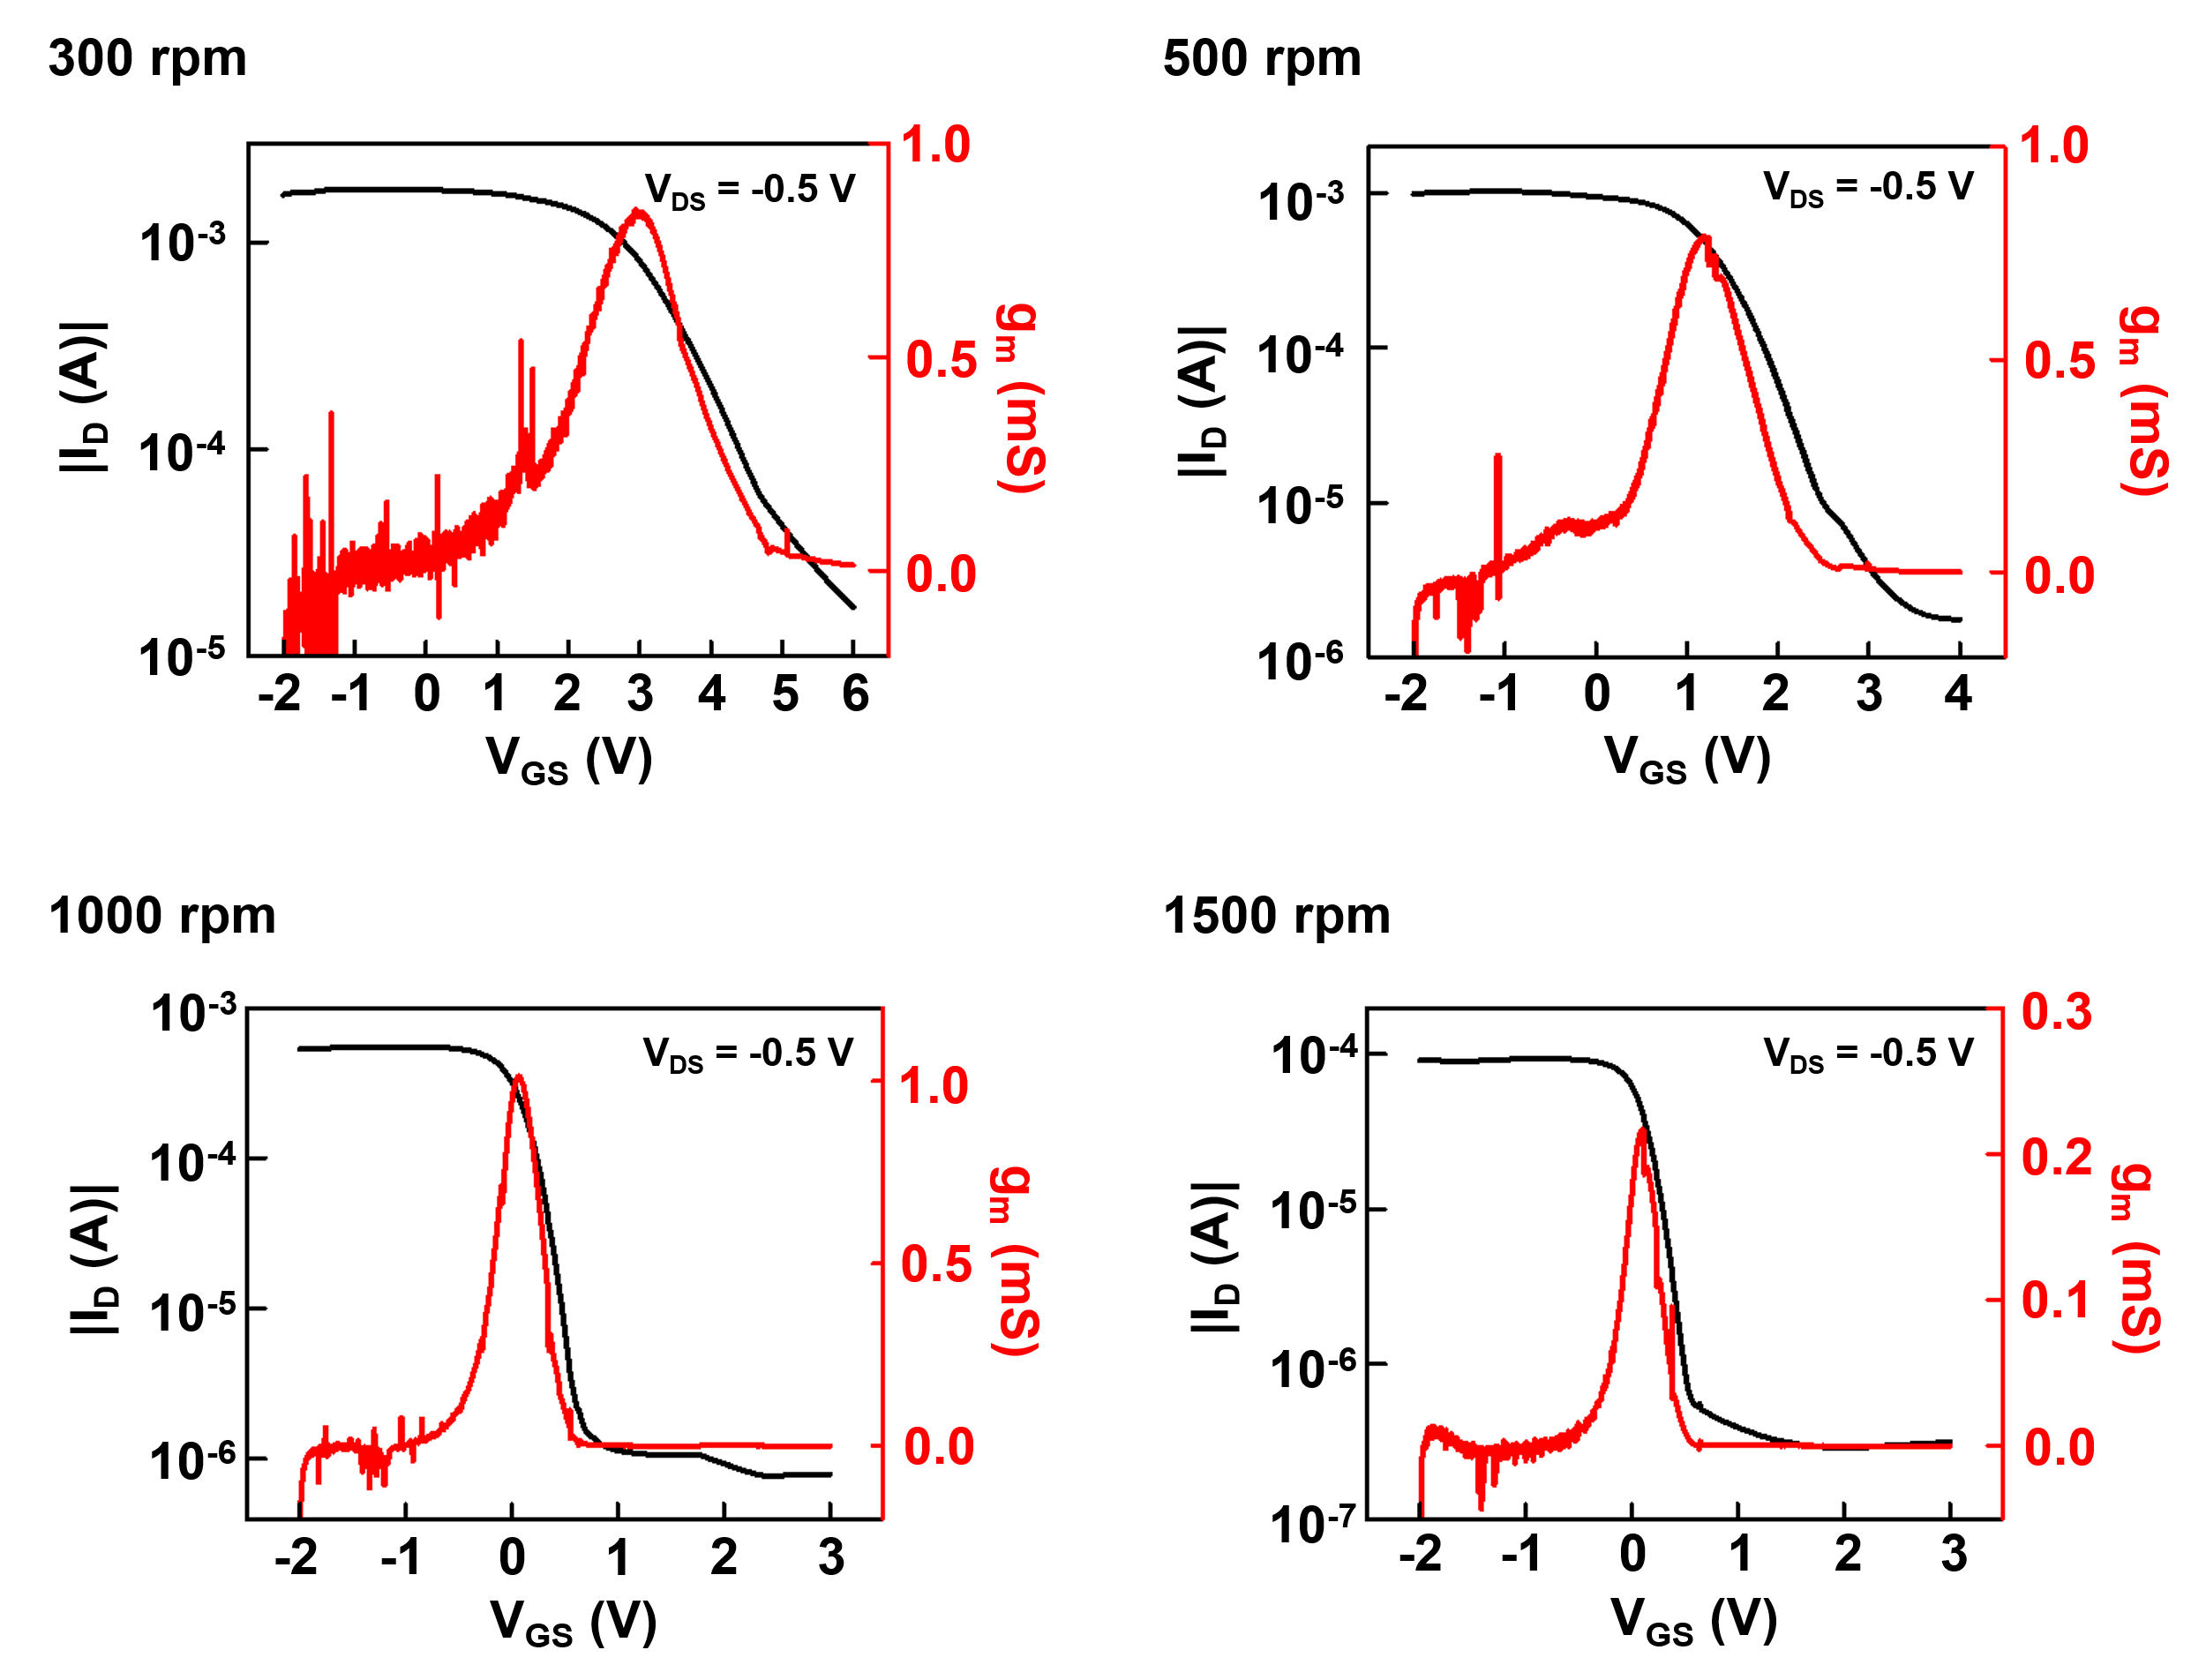


**Supplementary Figure 10**. Transfer characteristics and gm of OECTs based on PEDOT:PSS composite films spin-coated at different speeds (300, 500, 1000, and 1500 rpm).


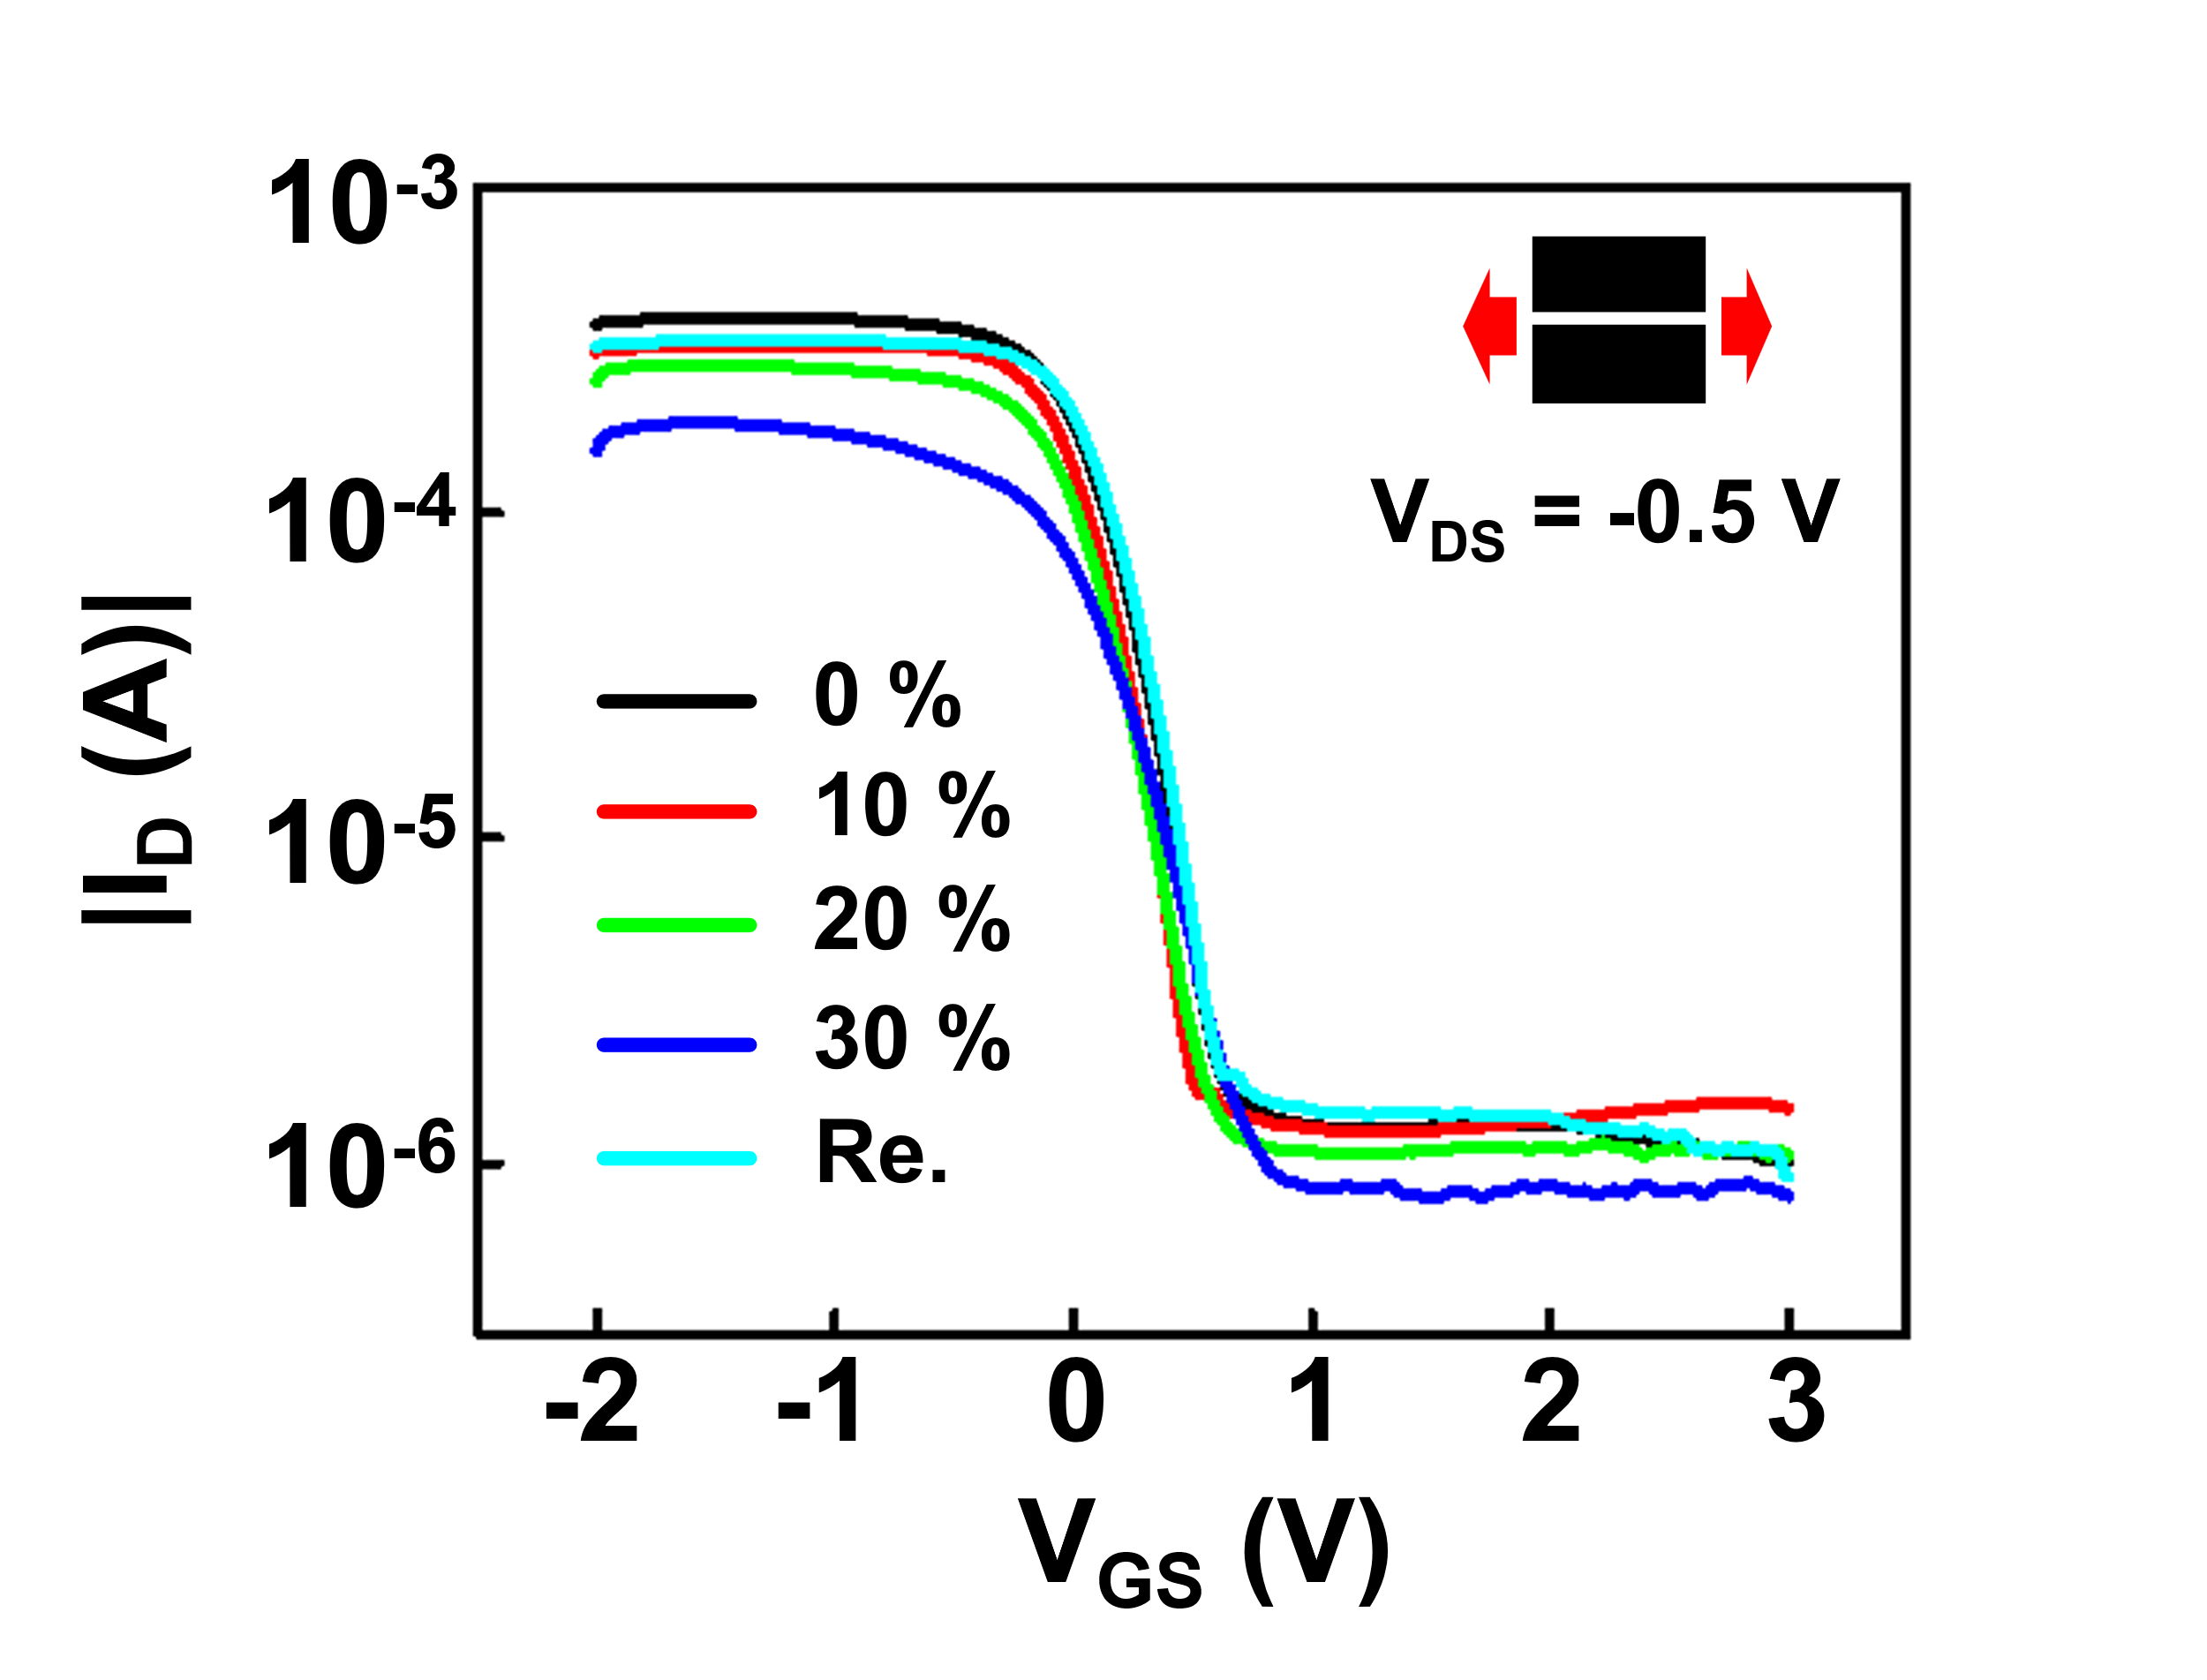


**Supplementary Figure 11**. Transfer characteristic of stretchable OECT under tensile strains of 0%, 10%, 20%, 30%, and after strain release (0%) applied perpendicular to the channel length direction.


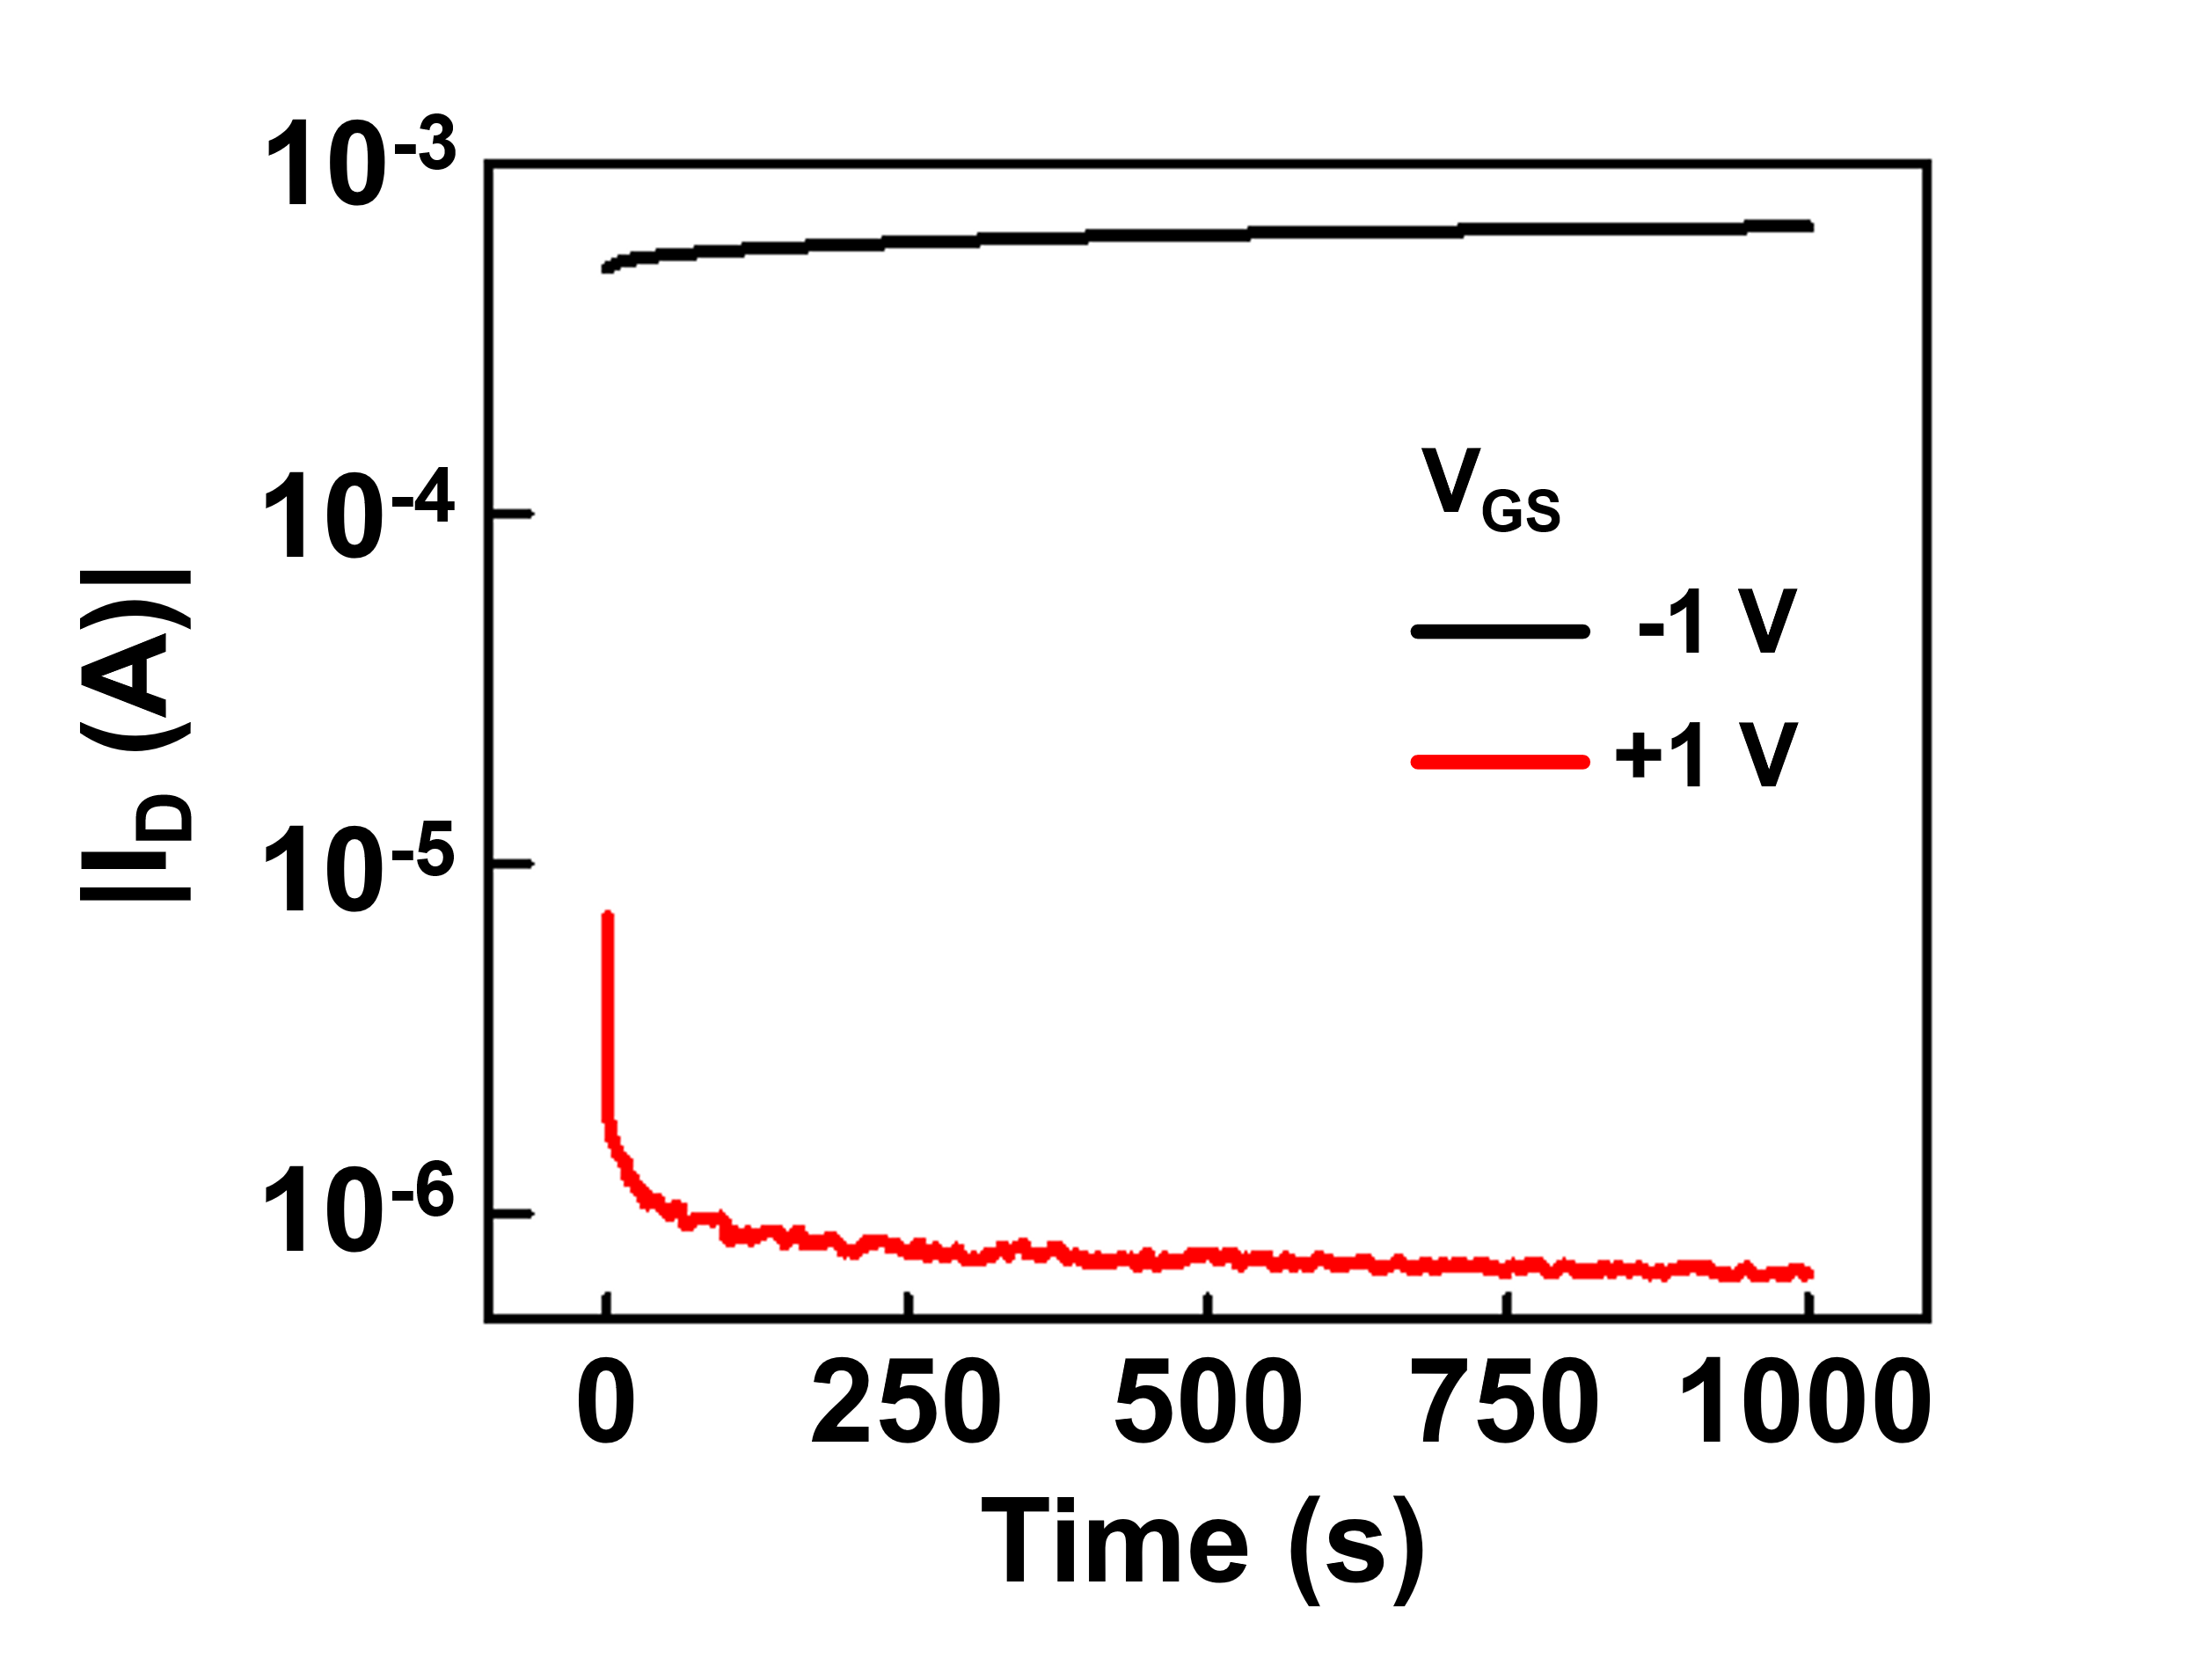


**Supplementary Figure 12**. *I*ON and *I*OFF of the device over 1000 s under a *V*DS of −0.5 V and *V*GS of −1 V and +1 V, respectively.


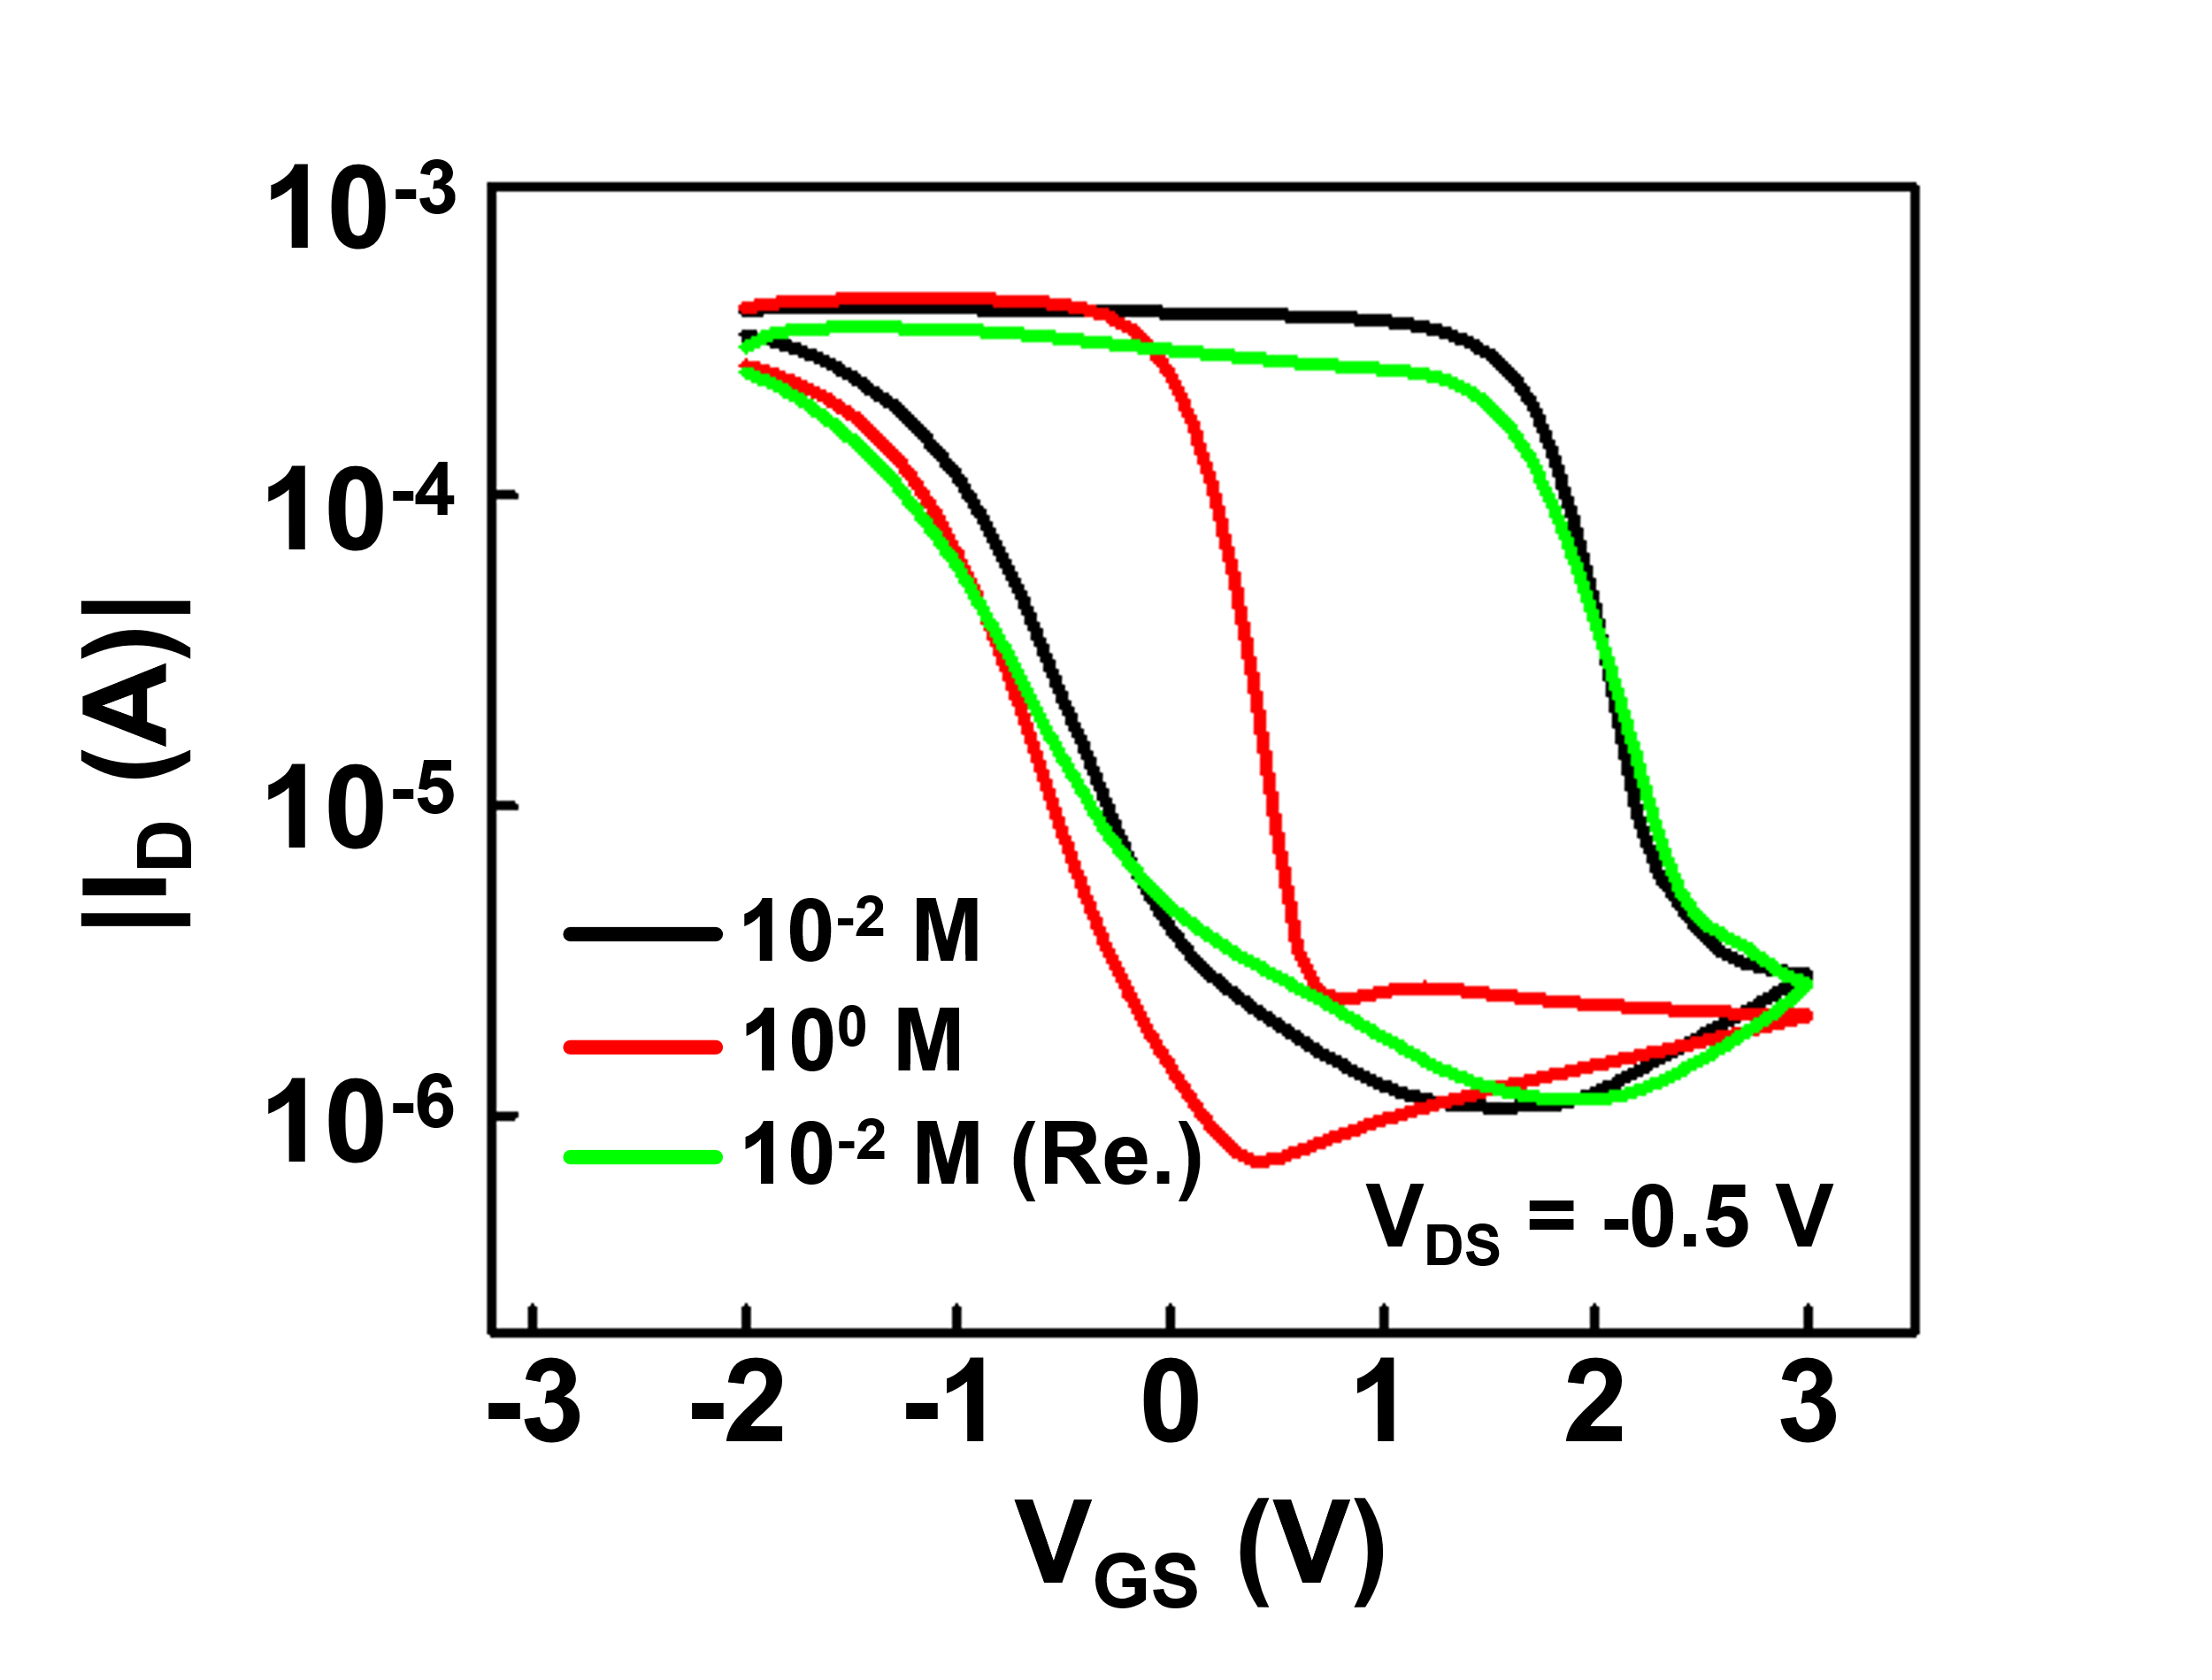


**Supplementary Figure 13**. Transfer characteristics under sequential NaCl switching (0.01 M → 1 M → 0.01 M) with DI rinsing.


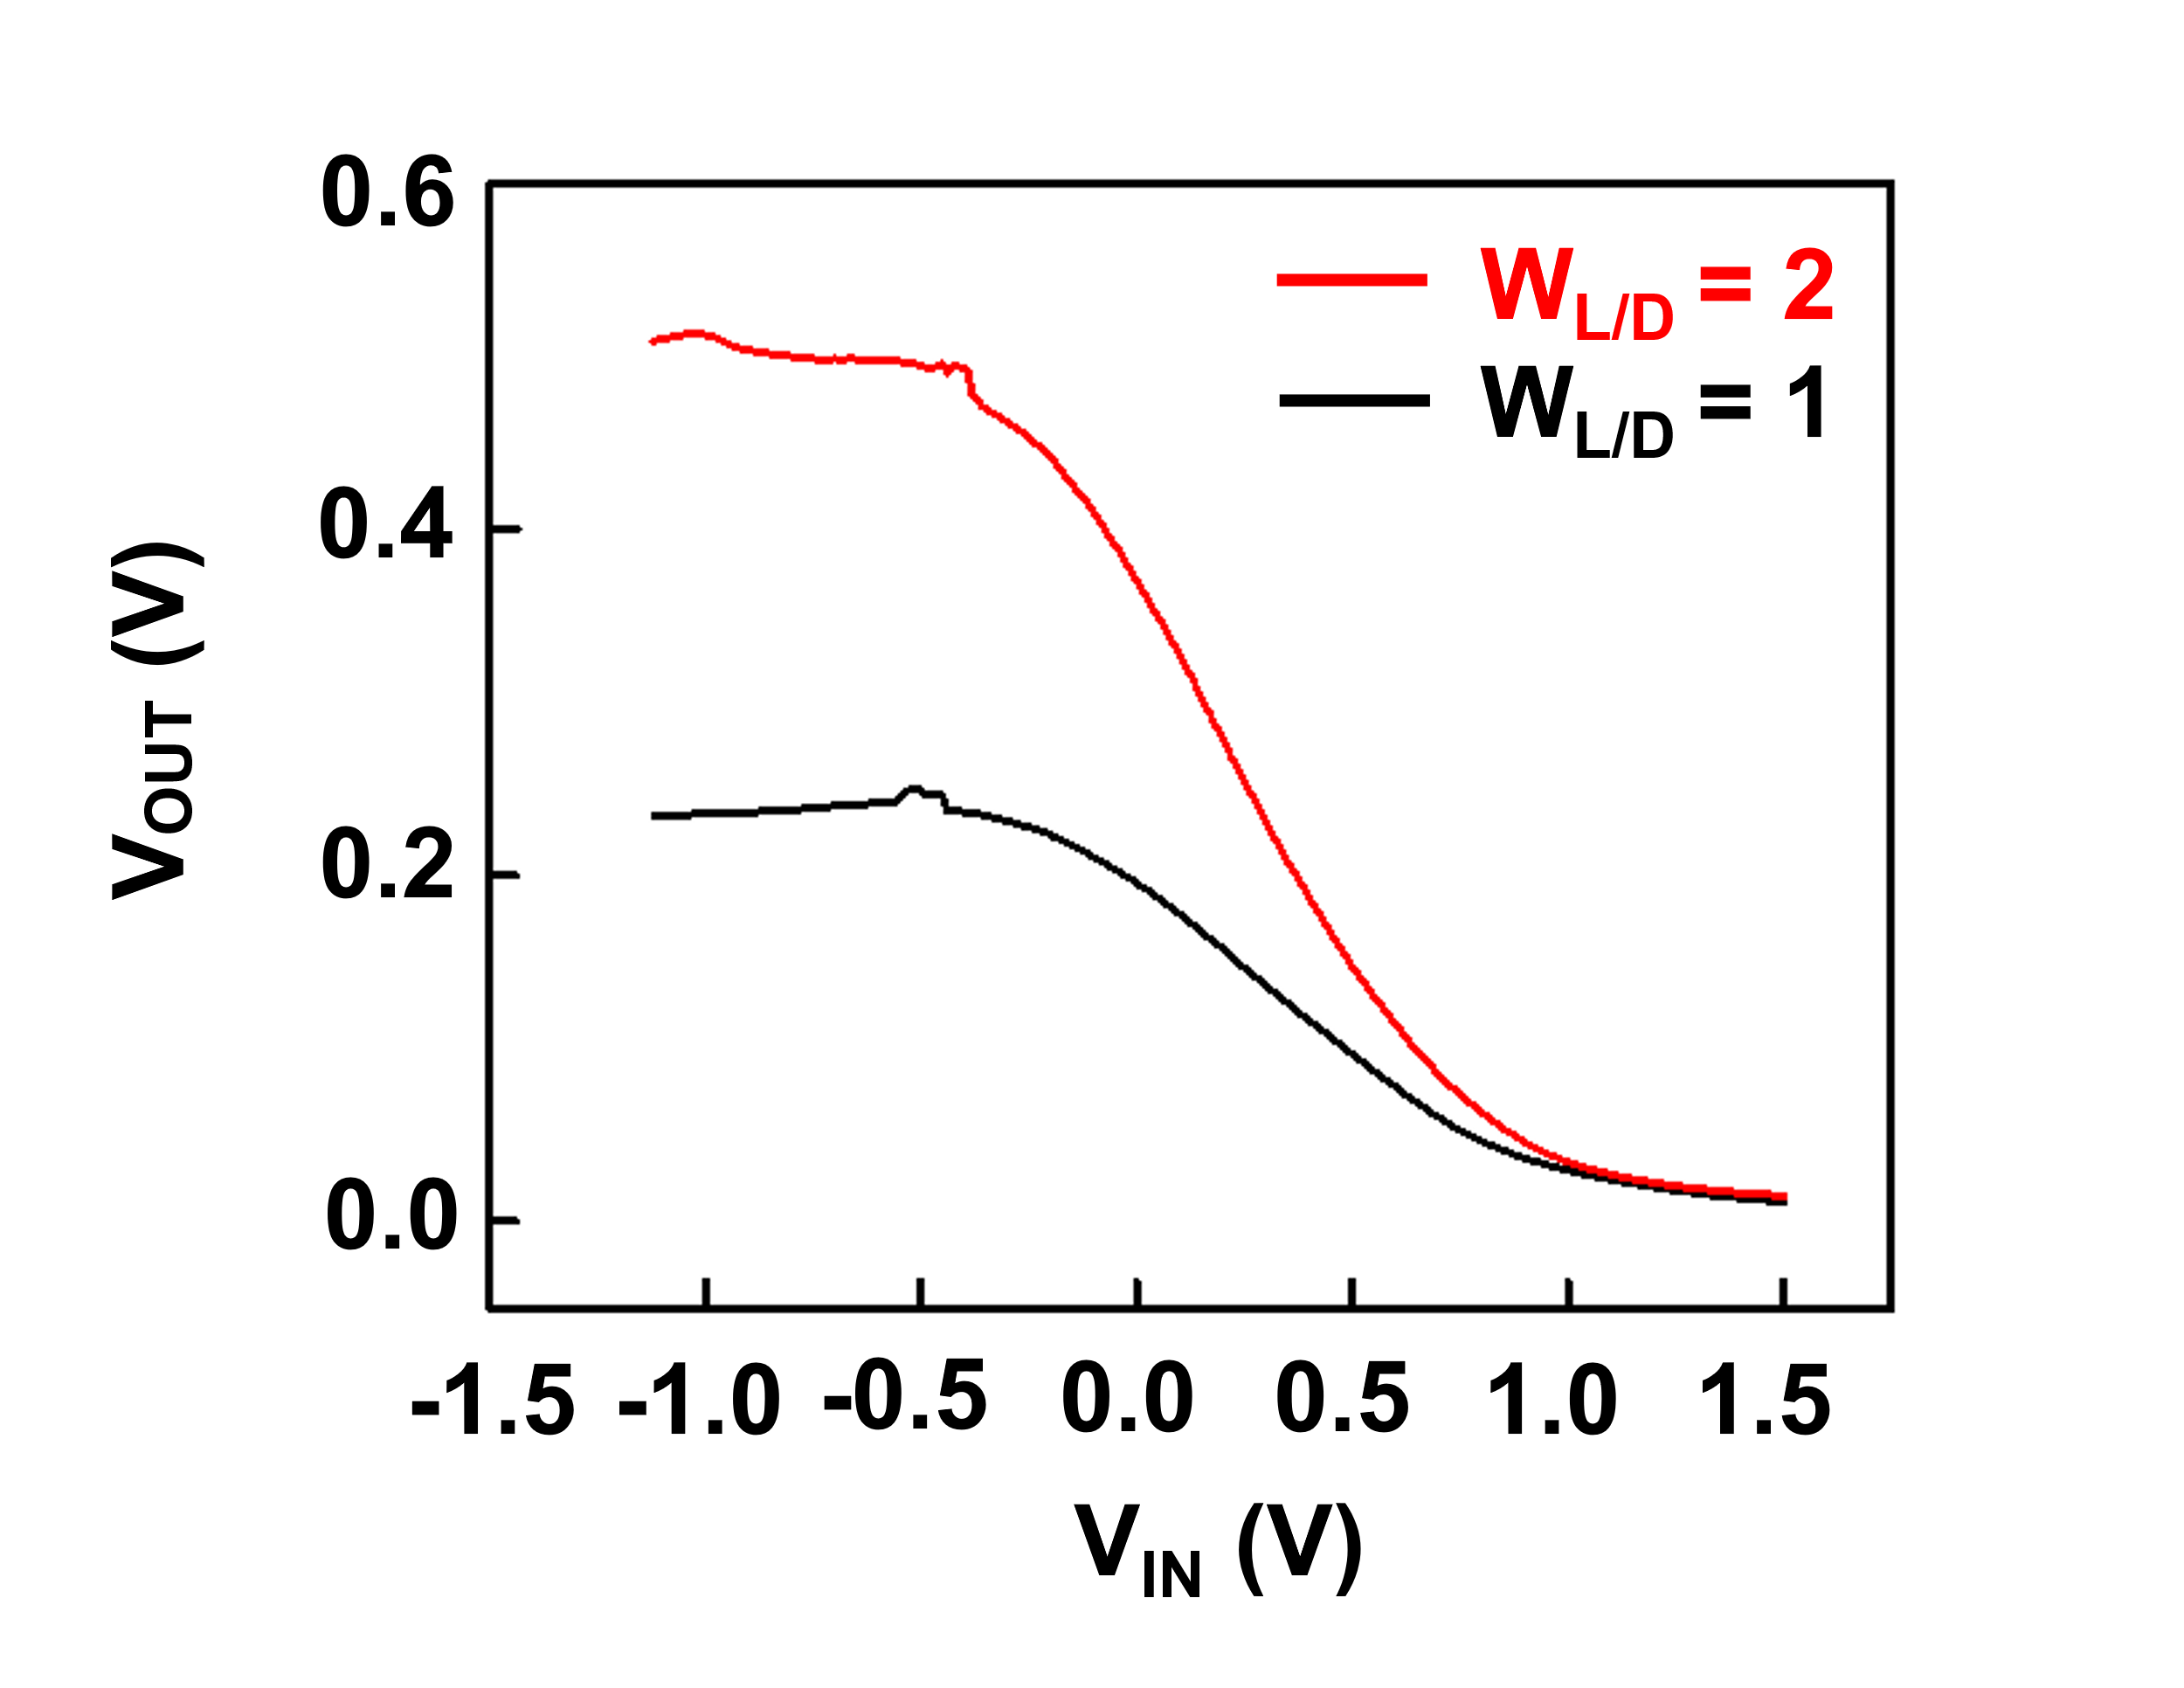


**Supplementary Figure 14**. VTCs of inverters as a function of the channel width ratio between the load and drive transistors (WL/D).


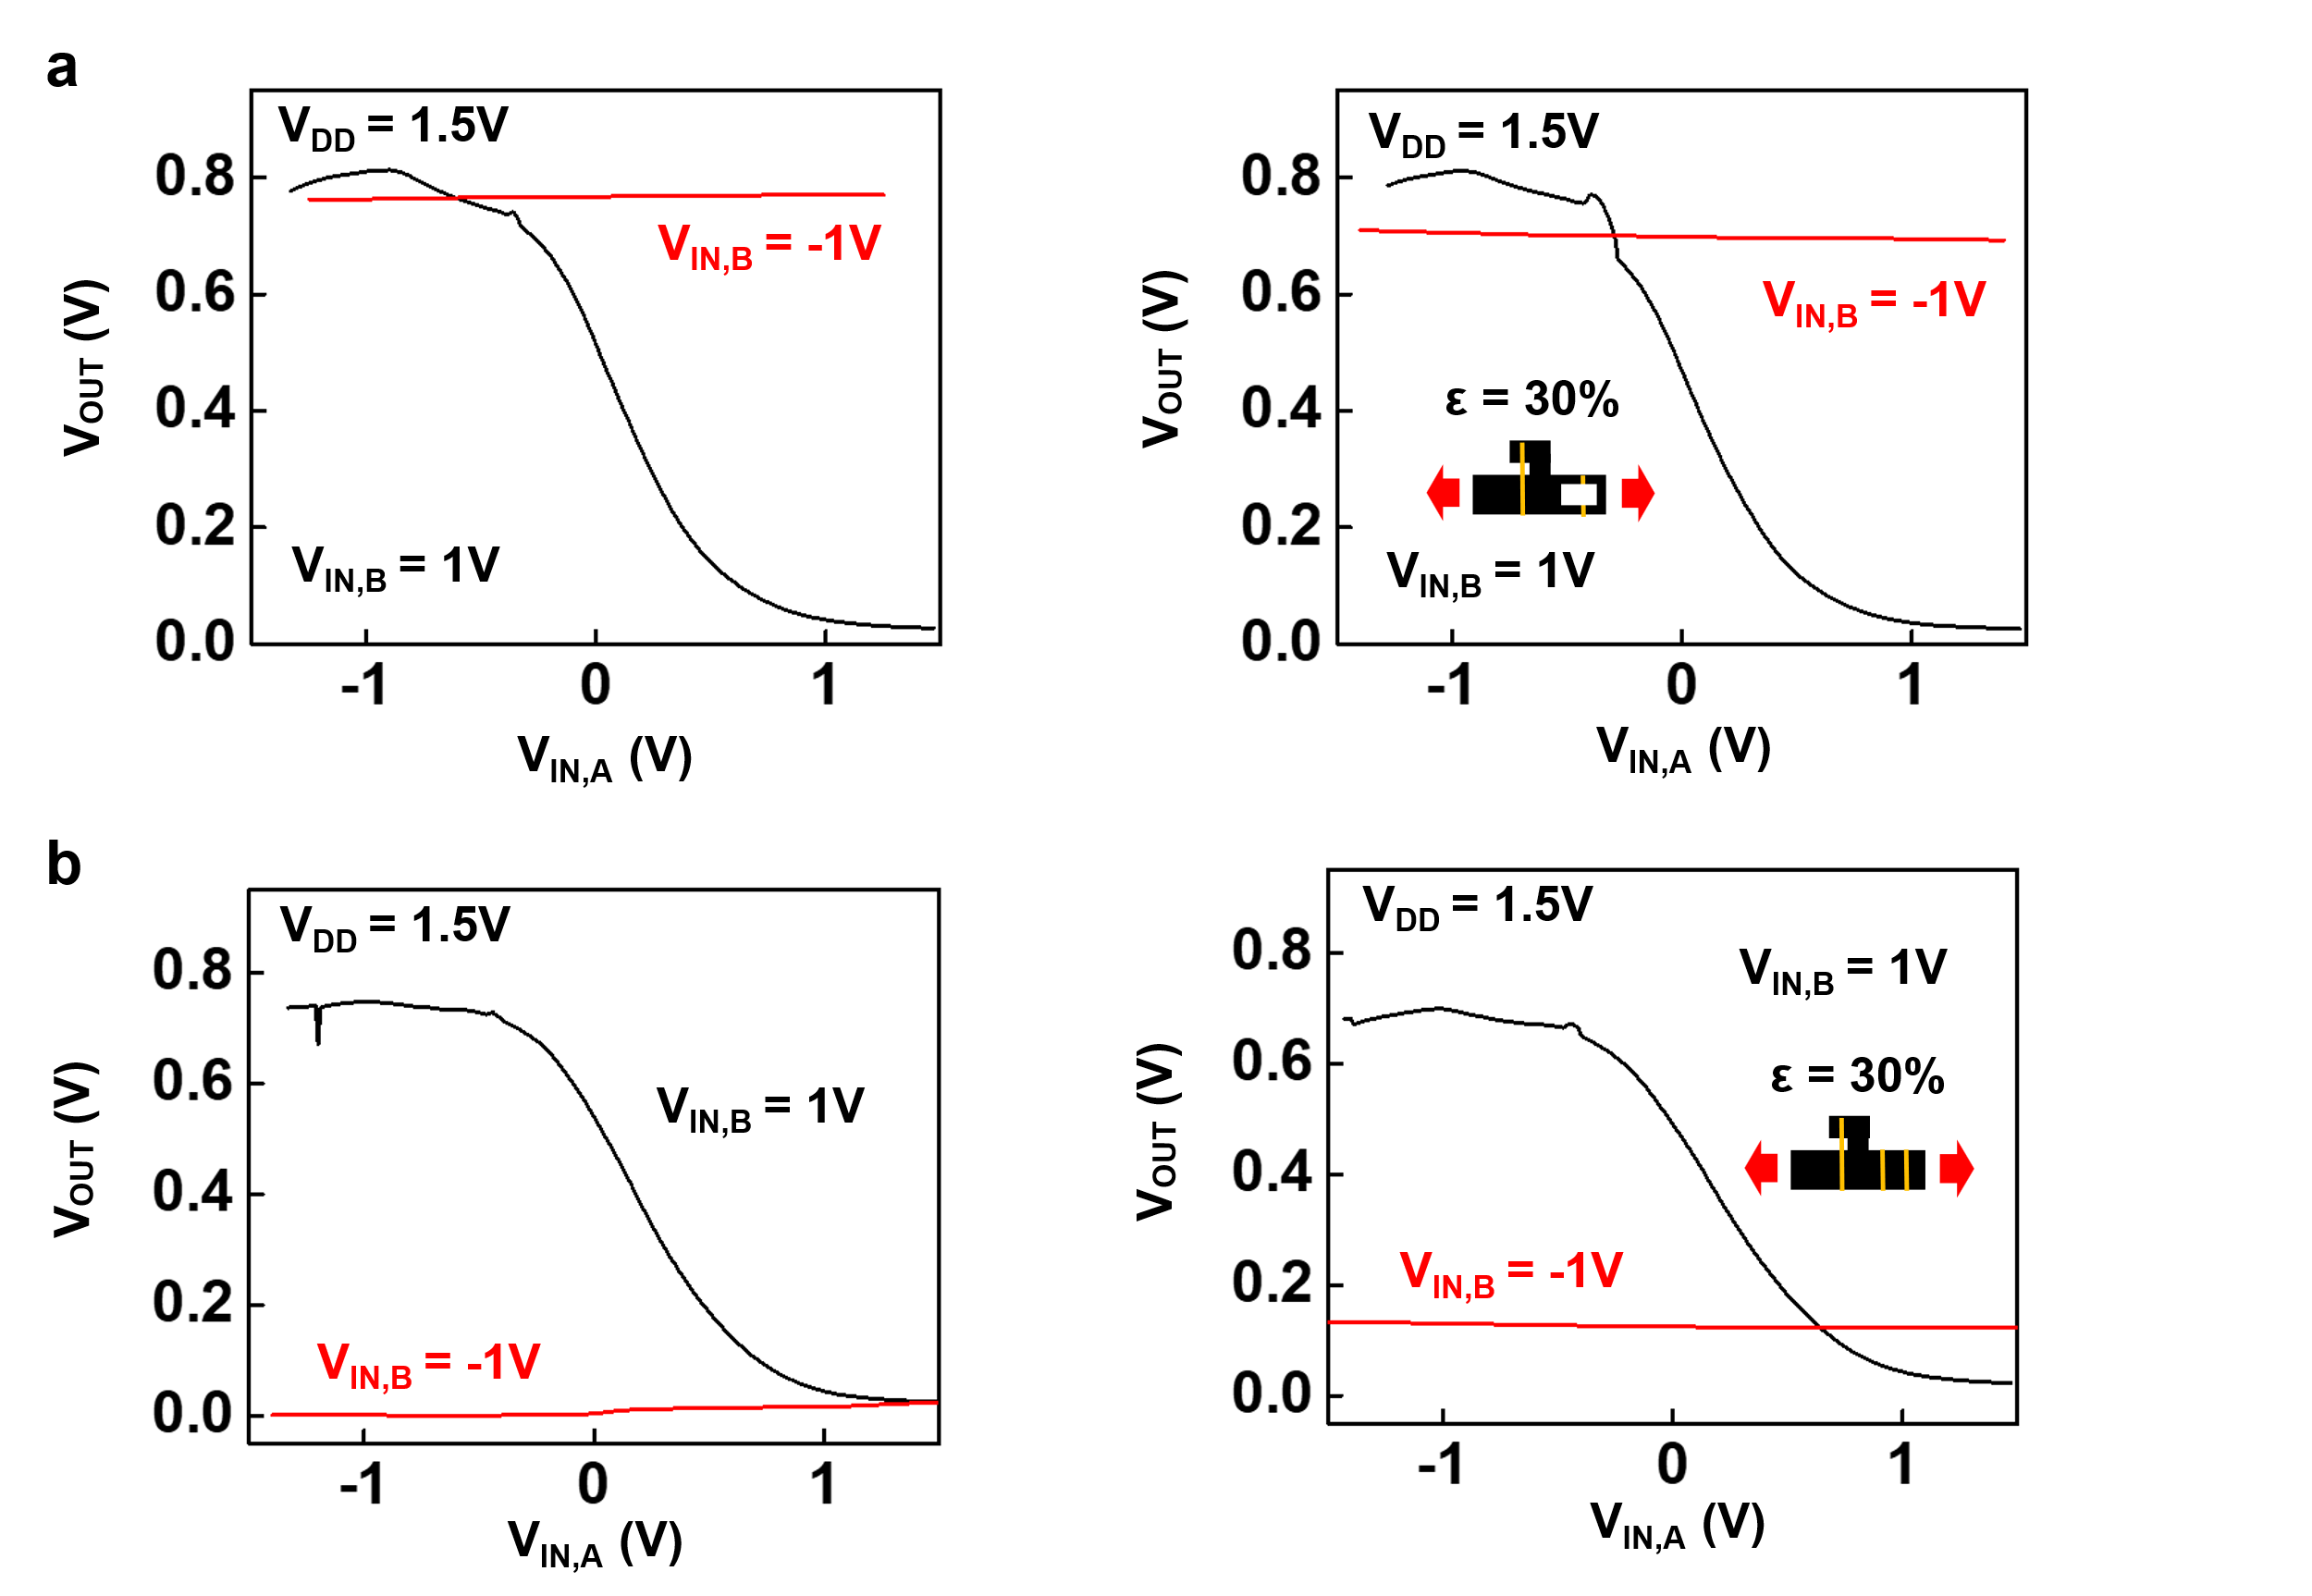


**Supplementary Figure 15**. **The static VTCs of both NAND and NOR logic gates.** **a,** VTC of NAND gate under tensile strain of 0% (left) and 30% (right) applied along the channel length direction. **b,** VTC of NOR gate under tensile strain of 0% (left) and 30% (right) applied along the channel length direction.


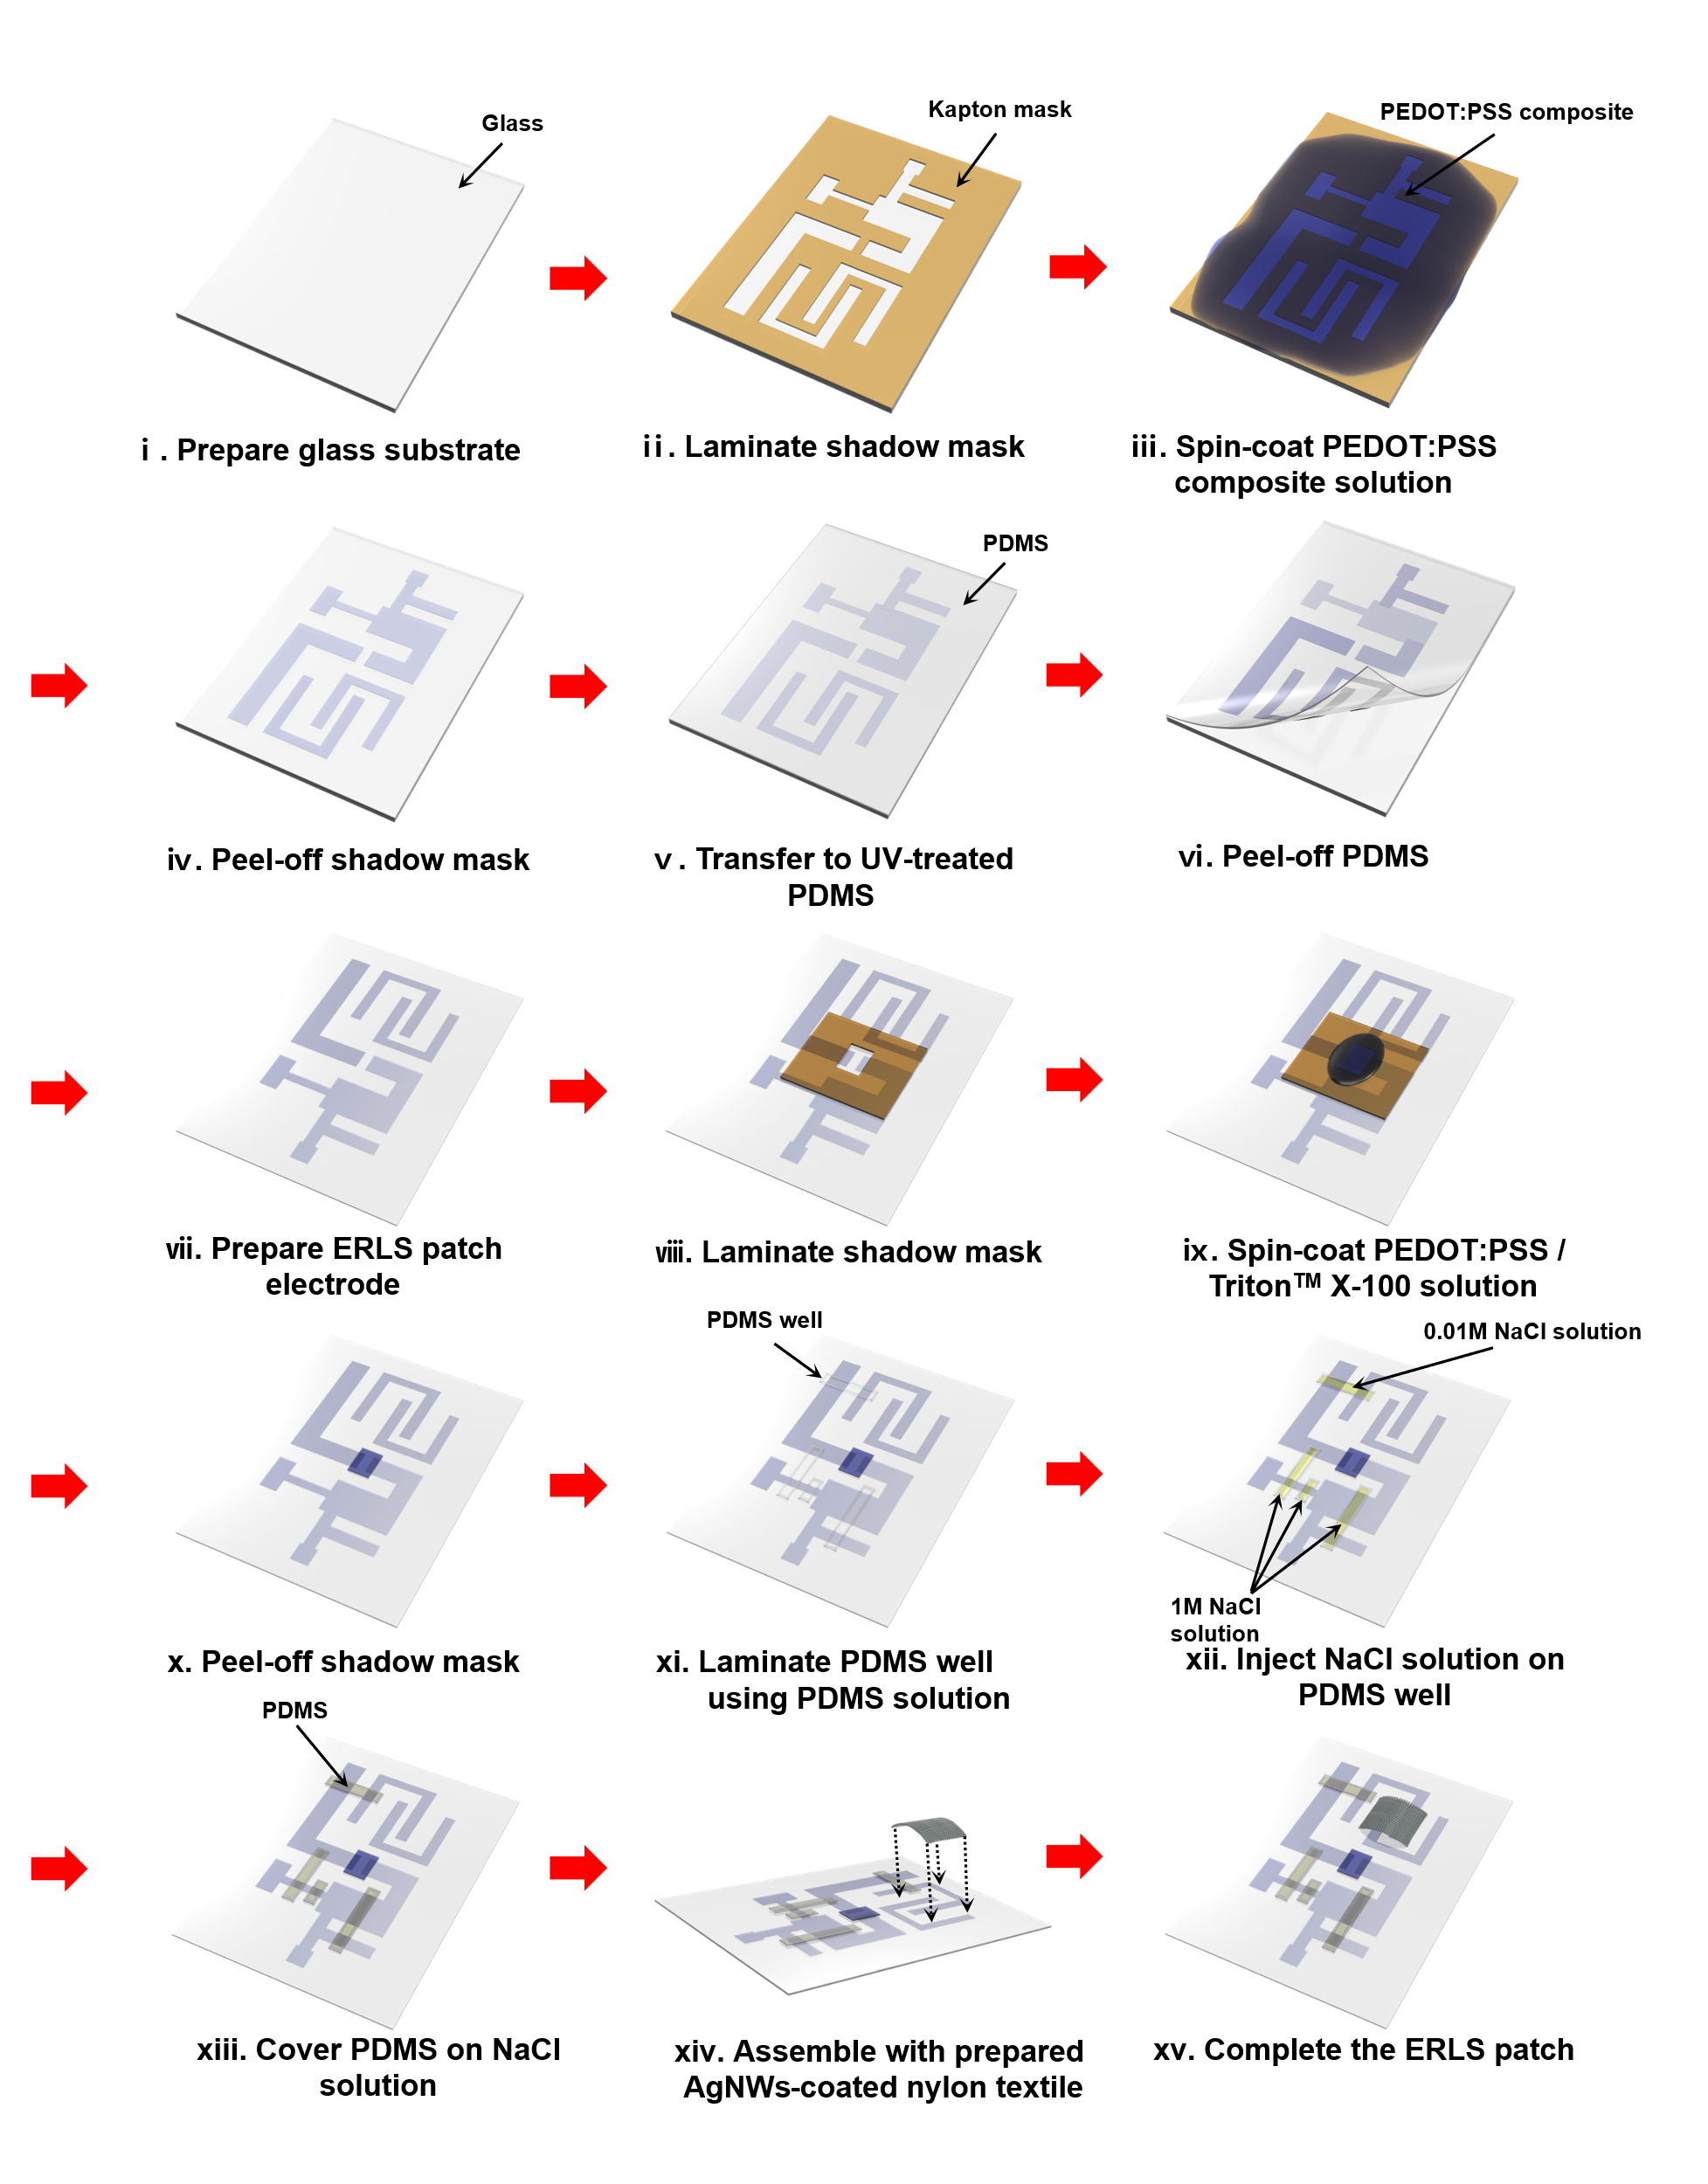


**Supplementary Figure 16**. The schematic fabrication process of the wearable adaptive logic system.


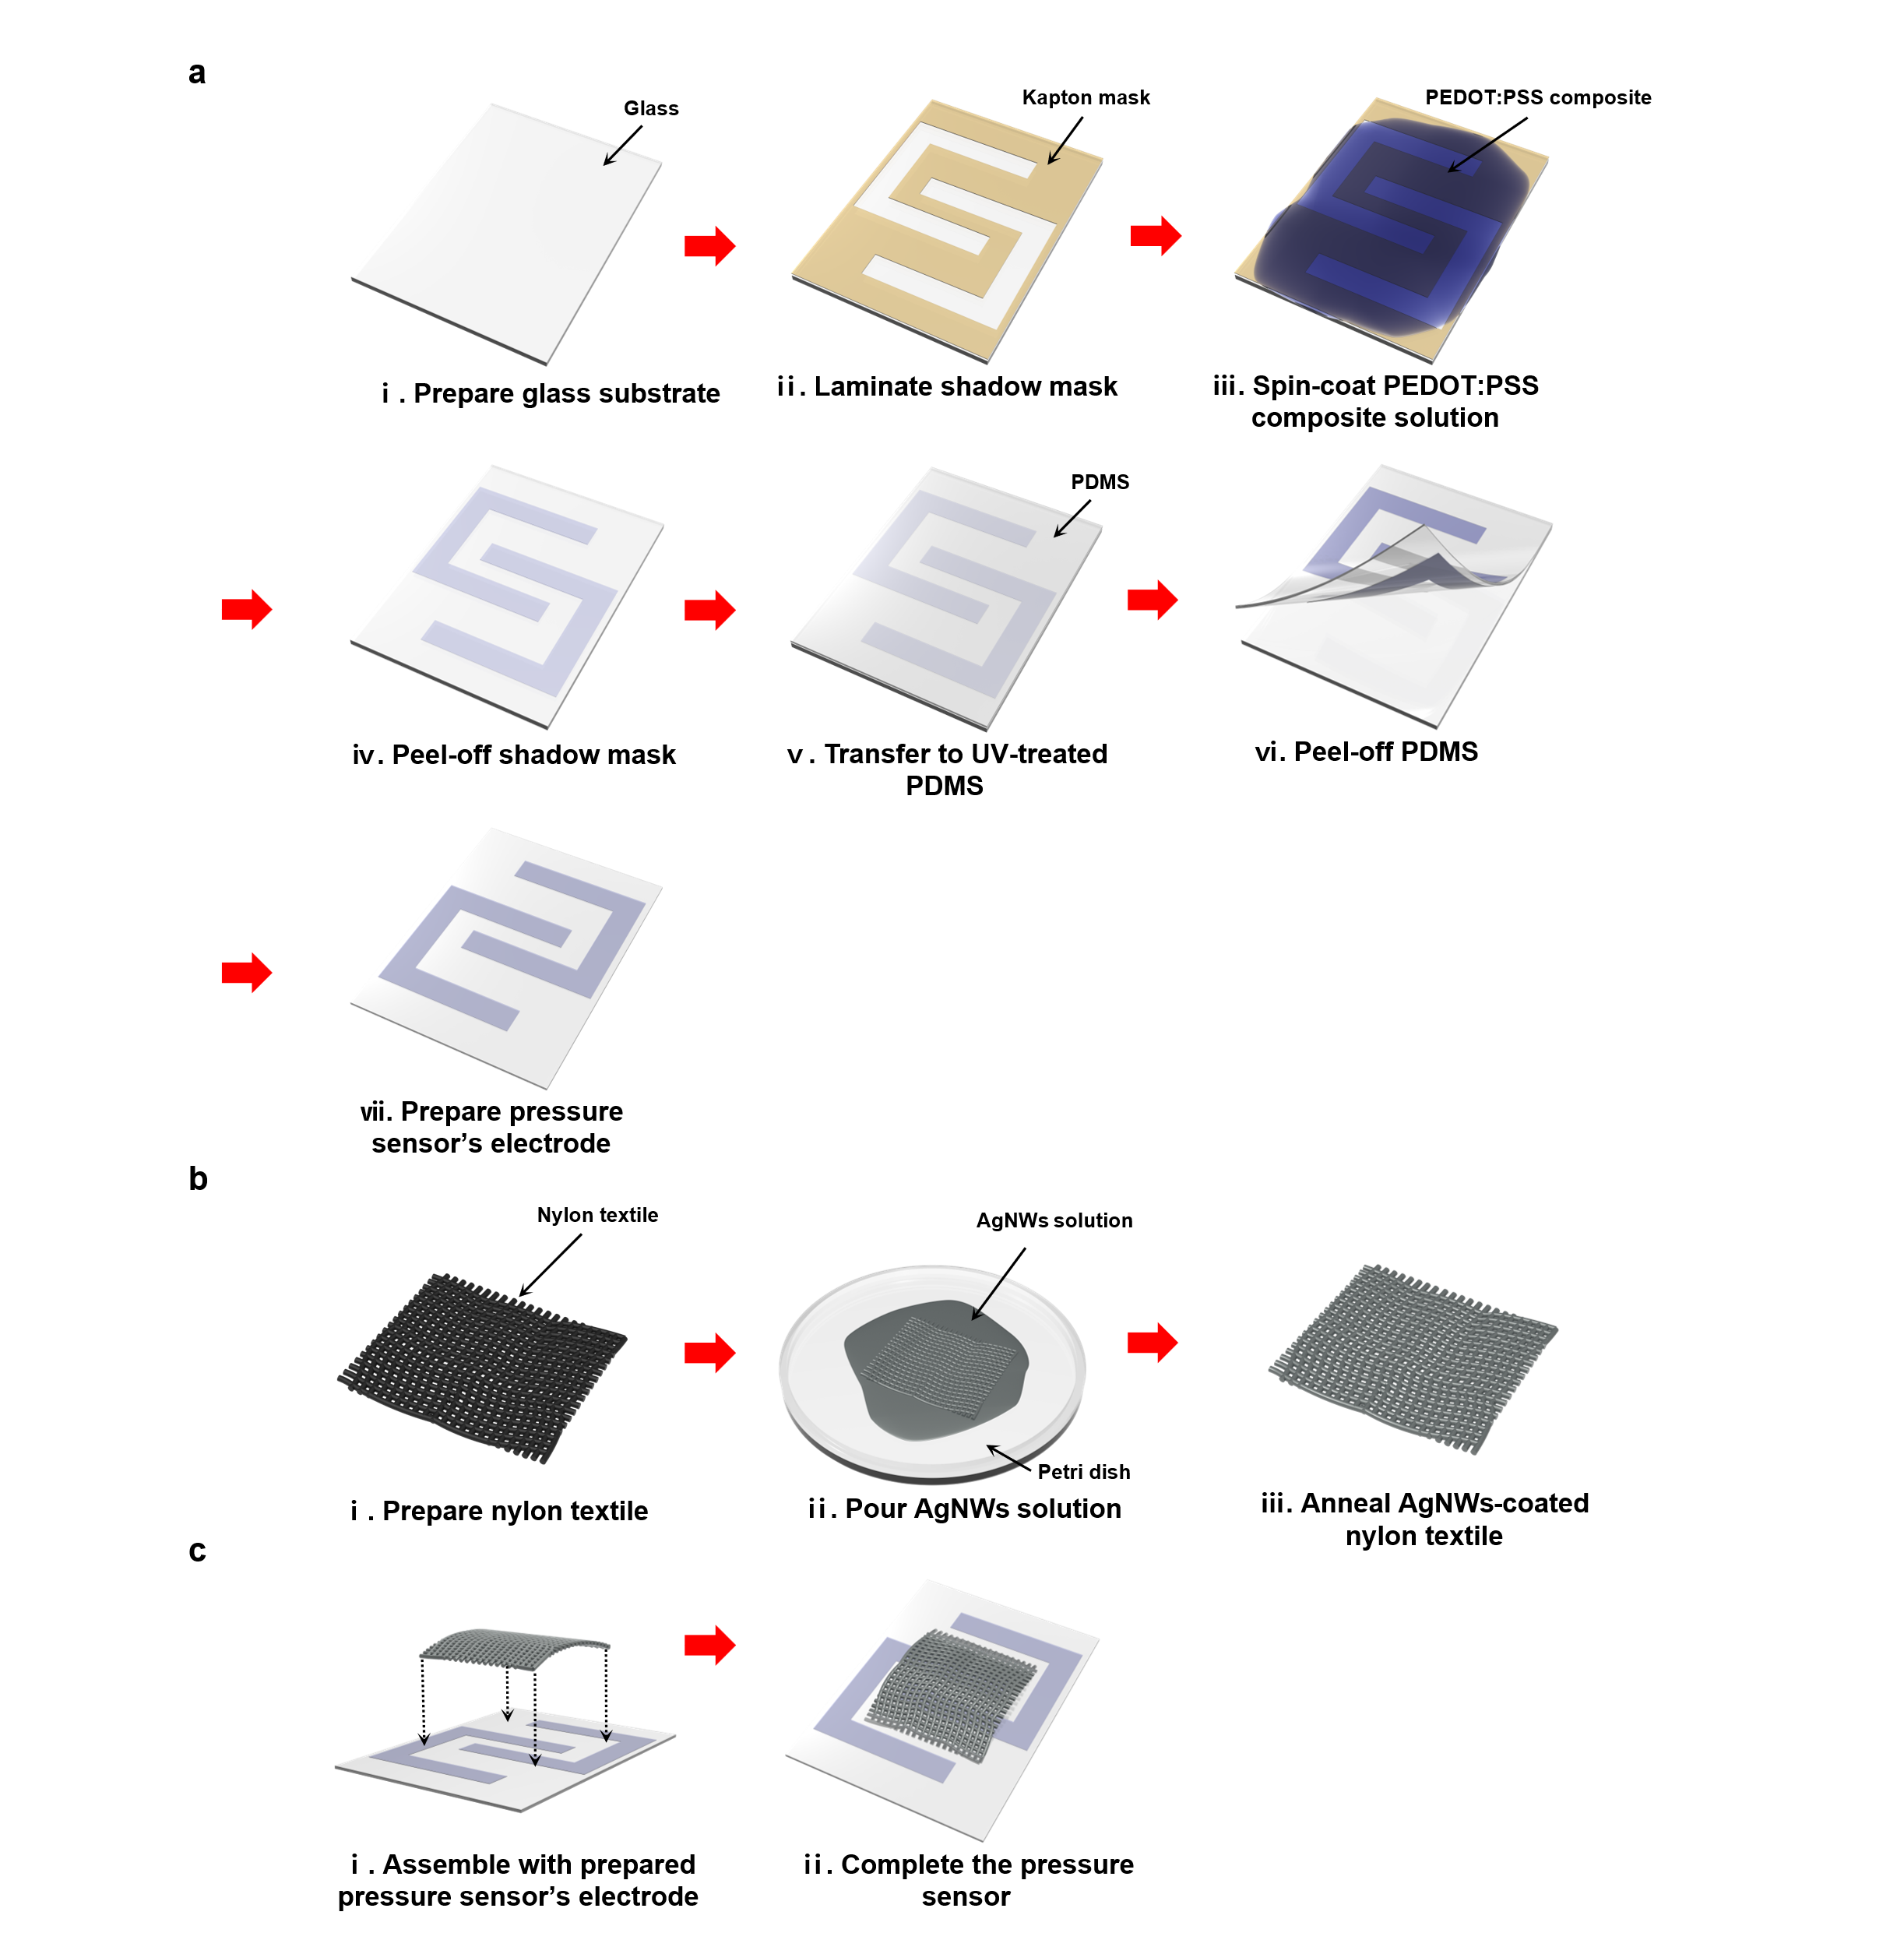


**Supplementary Figure 17**. **The schematic fabrication process of the stretchable pressure sensor. a,** The schematic fabrication process of the pressure sensor’s electrode pattern. **b,** Preparation of the AgNWs-coated nylon textile. **c,** Assembly of the pressure sensor by laminating the AgNWs-coated textile onto the patterned electrode.


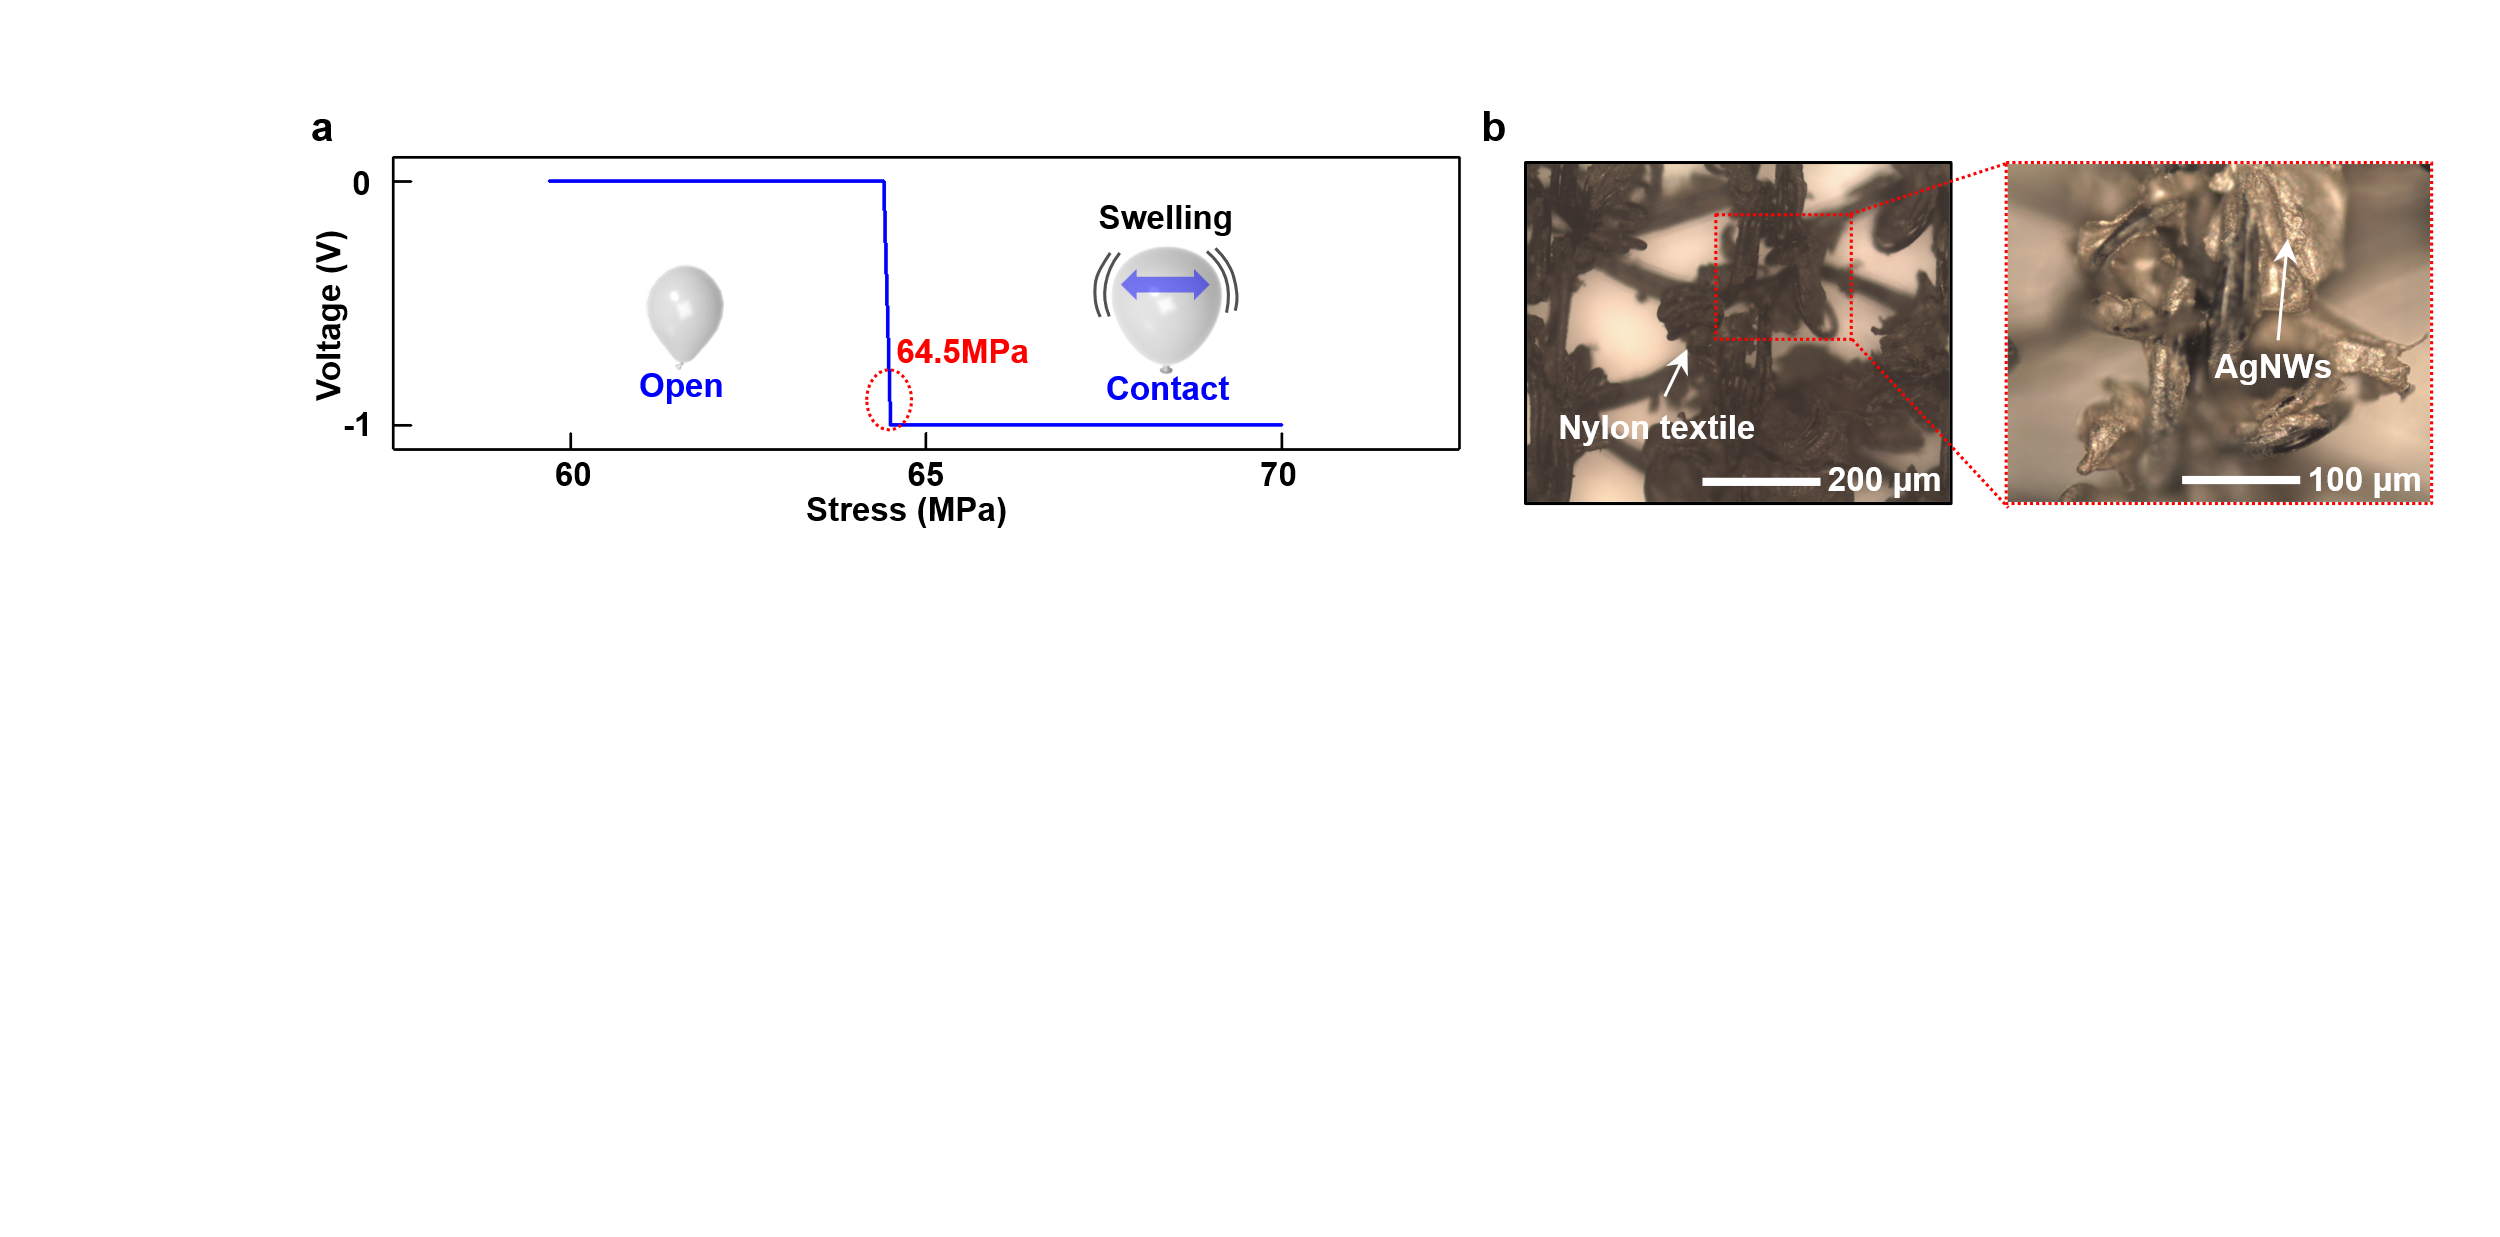


**Supplementary Figure 18**. **Characteristic of pressure sensor and structural analysis of the AgNWs-coated nylon textile.**  **a,** Voltage responses of the pressure sensor as a function of mechanical stress. **b,** OM images of AgNWs-coated nylon textile confirming conductive network formation.


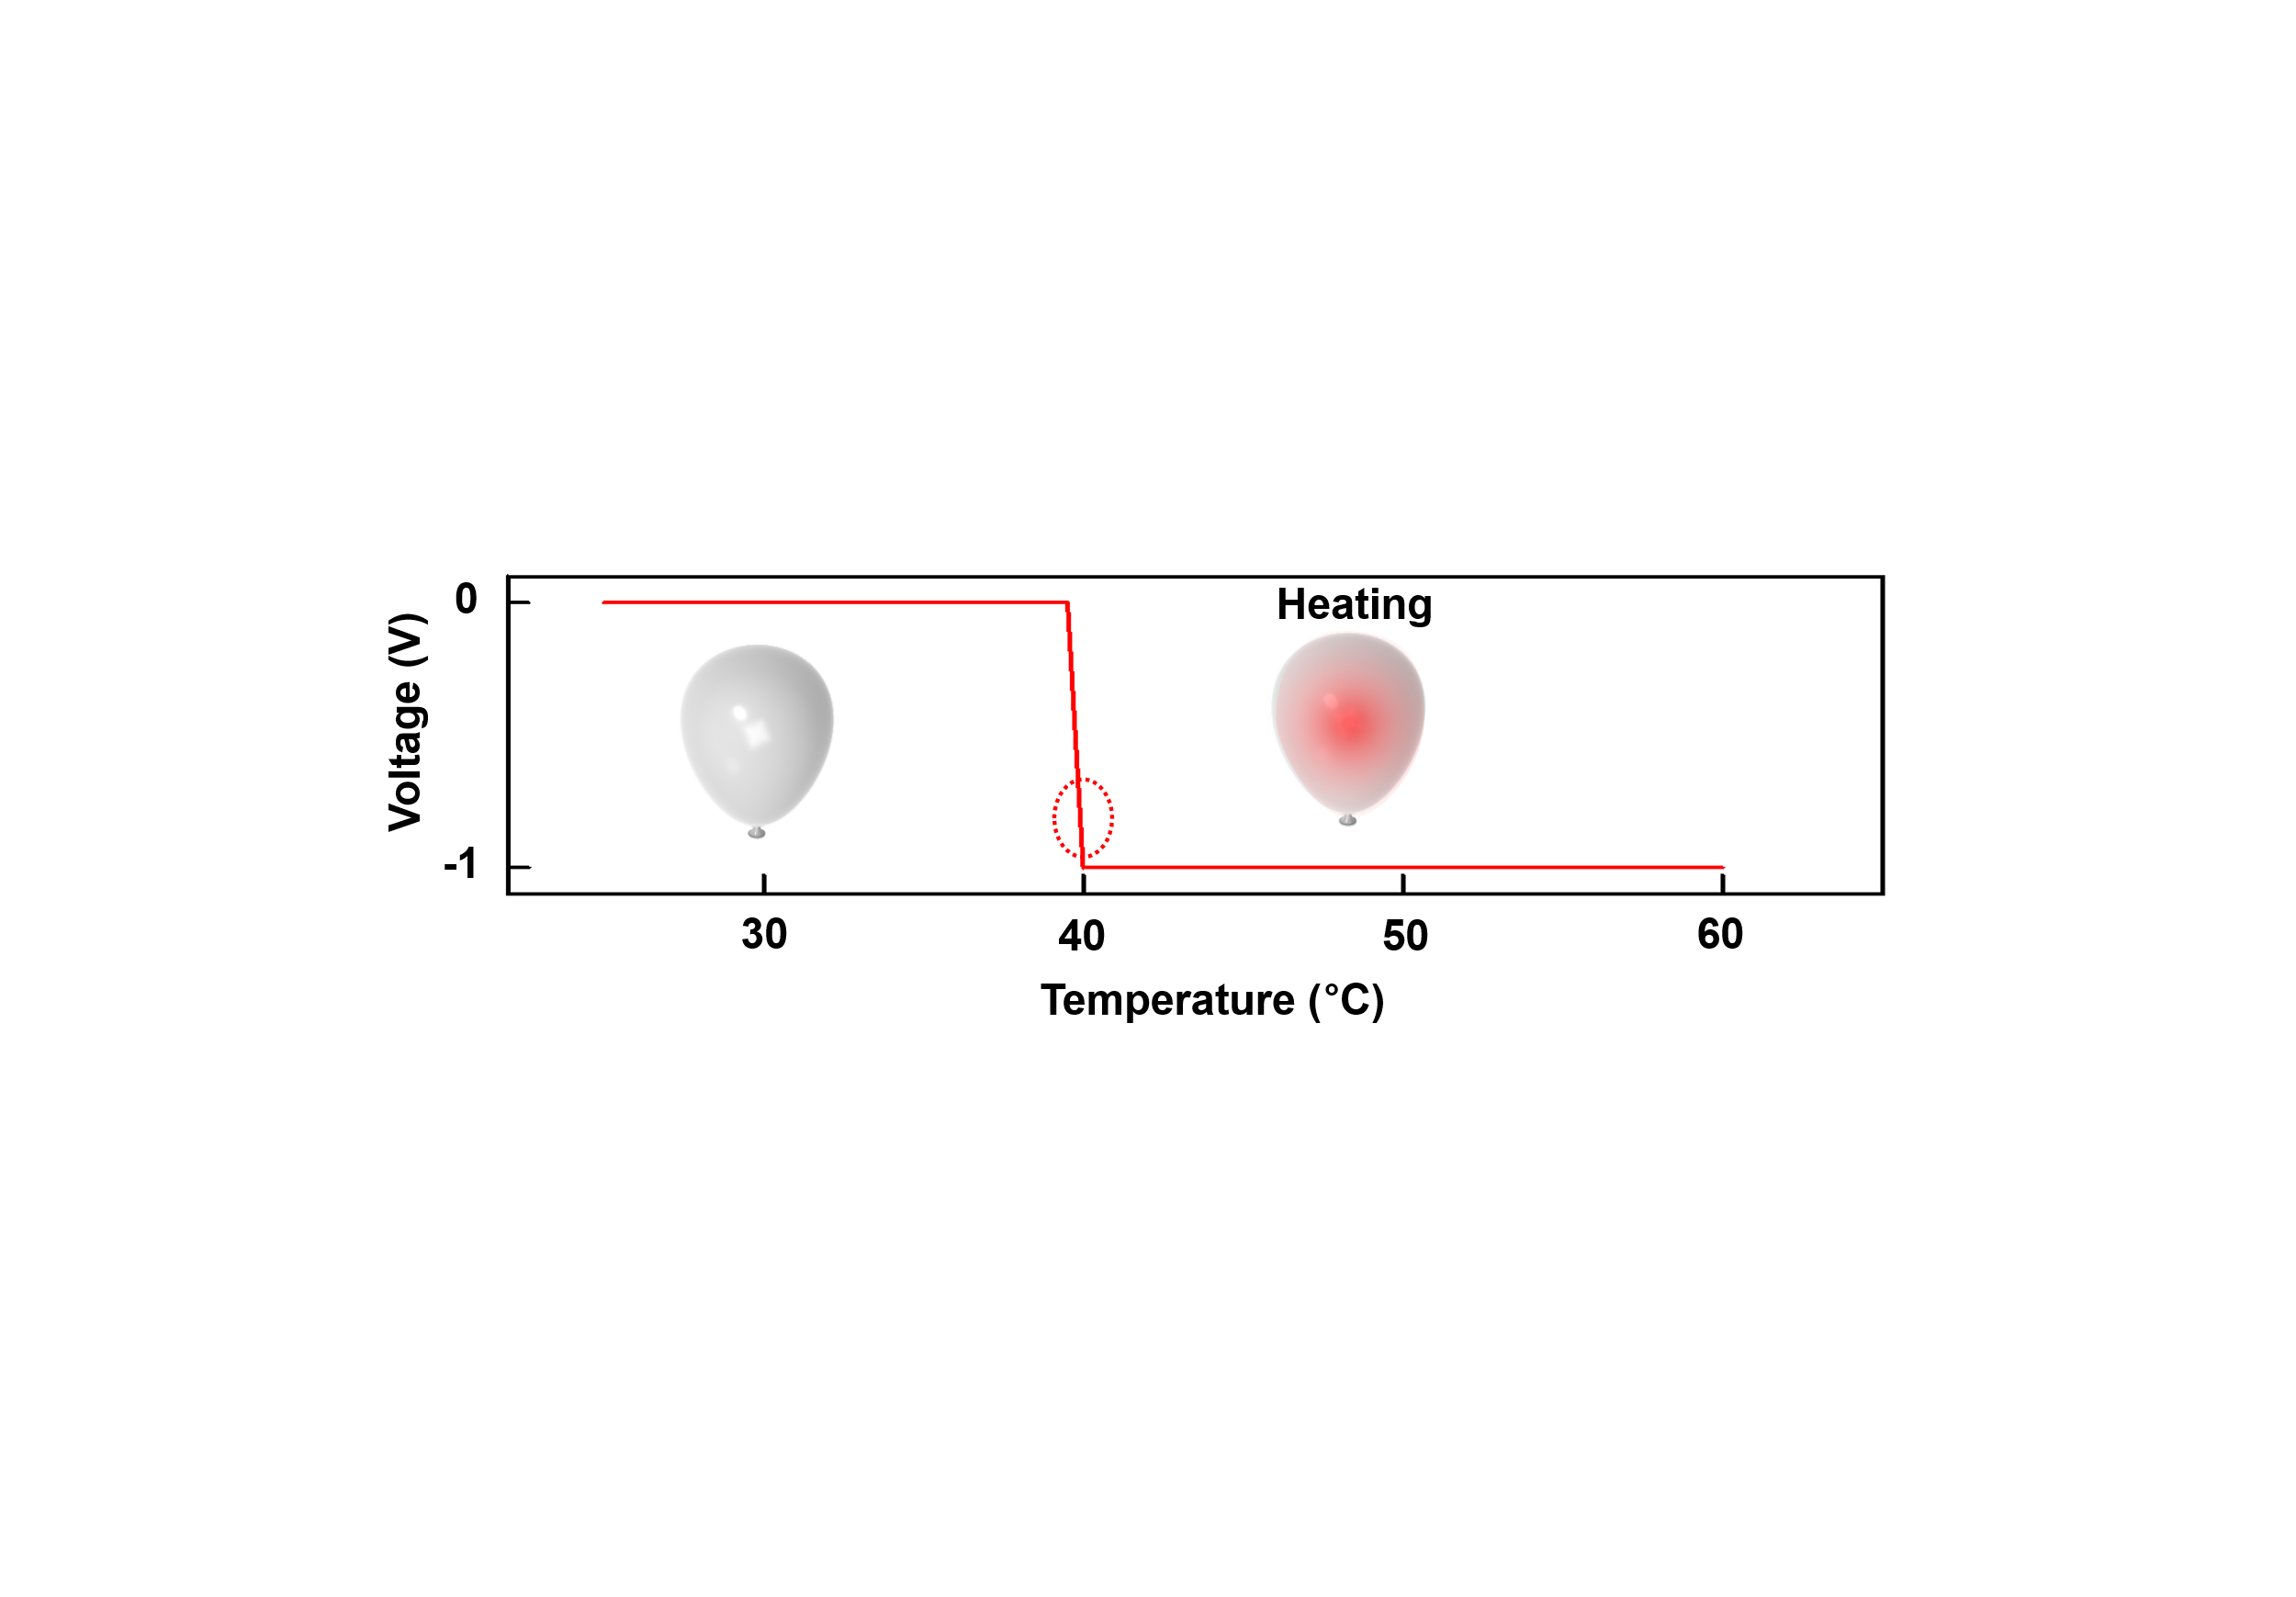


**Supplementary Figure 19**. Voltage responses of the temperature sensor as a function of temperature.

**
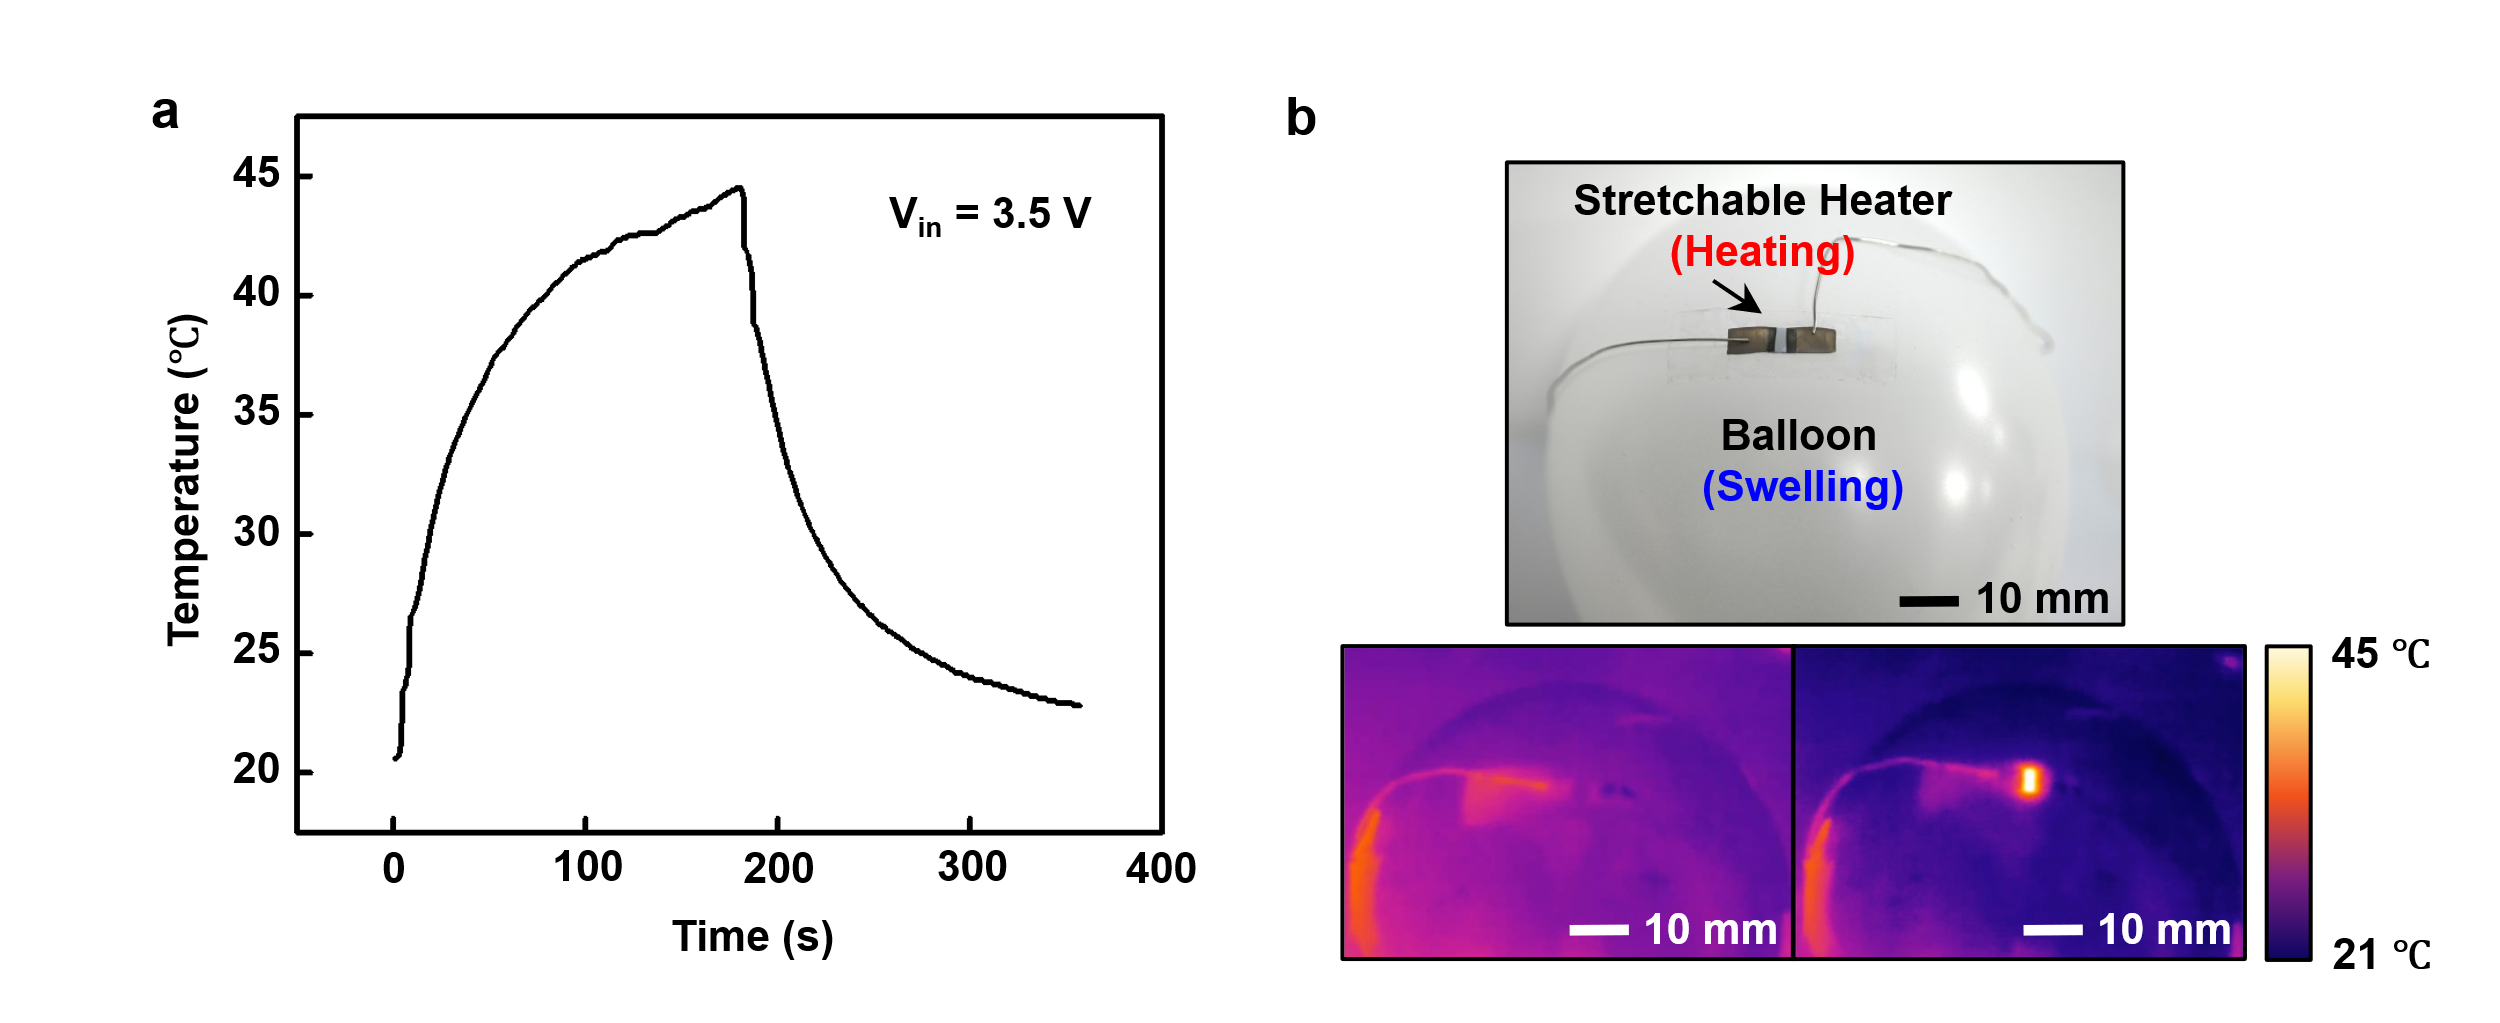
**

**Supplementary Figure 20. Simulation of inflammatory edema using a balloon-swelling model integrated with a stretchable heater.** **a,** Temporal temperature profile of a stretchable heater under 3.5 V bias, classification of hyperthermic condition (Temperature > 40 °C) and normothermic condition (Temperature < 40 °C, heater off). **b,** Optical image of a heater-integrated module mounted on a balloon model, experimental simulation of edema conditions, mimicry of hyperthermic swelling through balloon inflation.


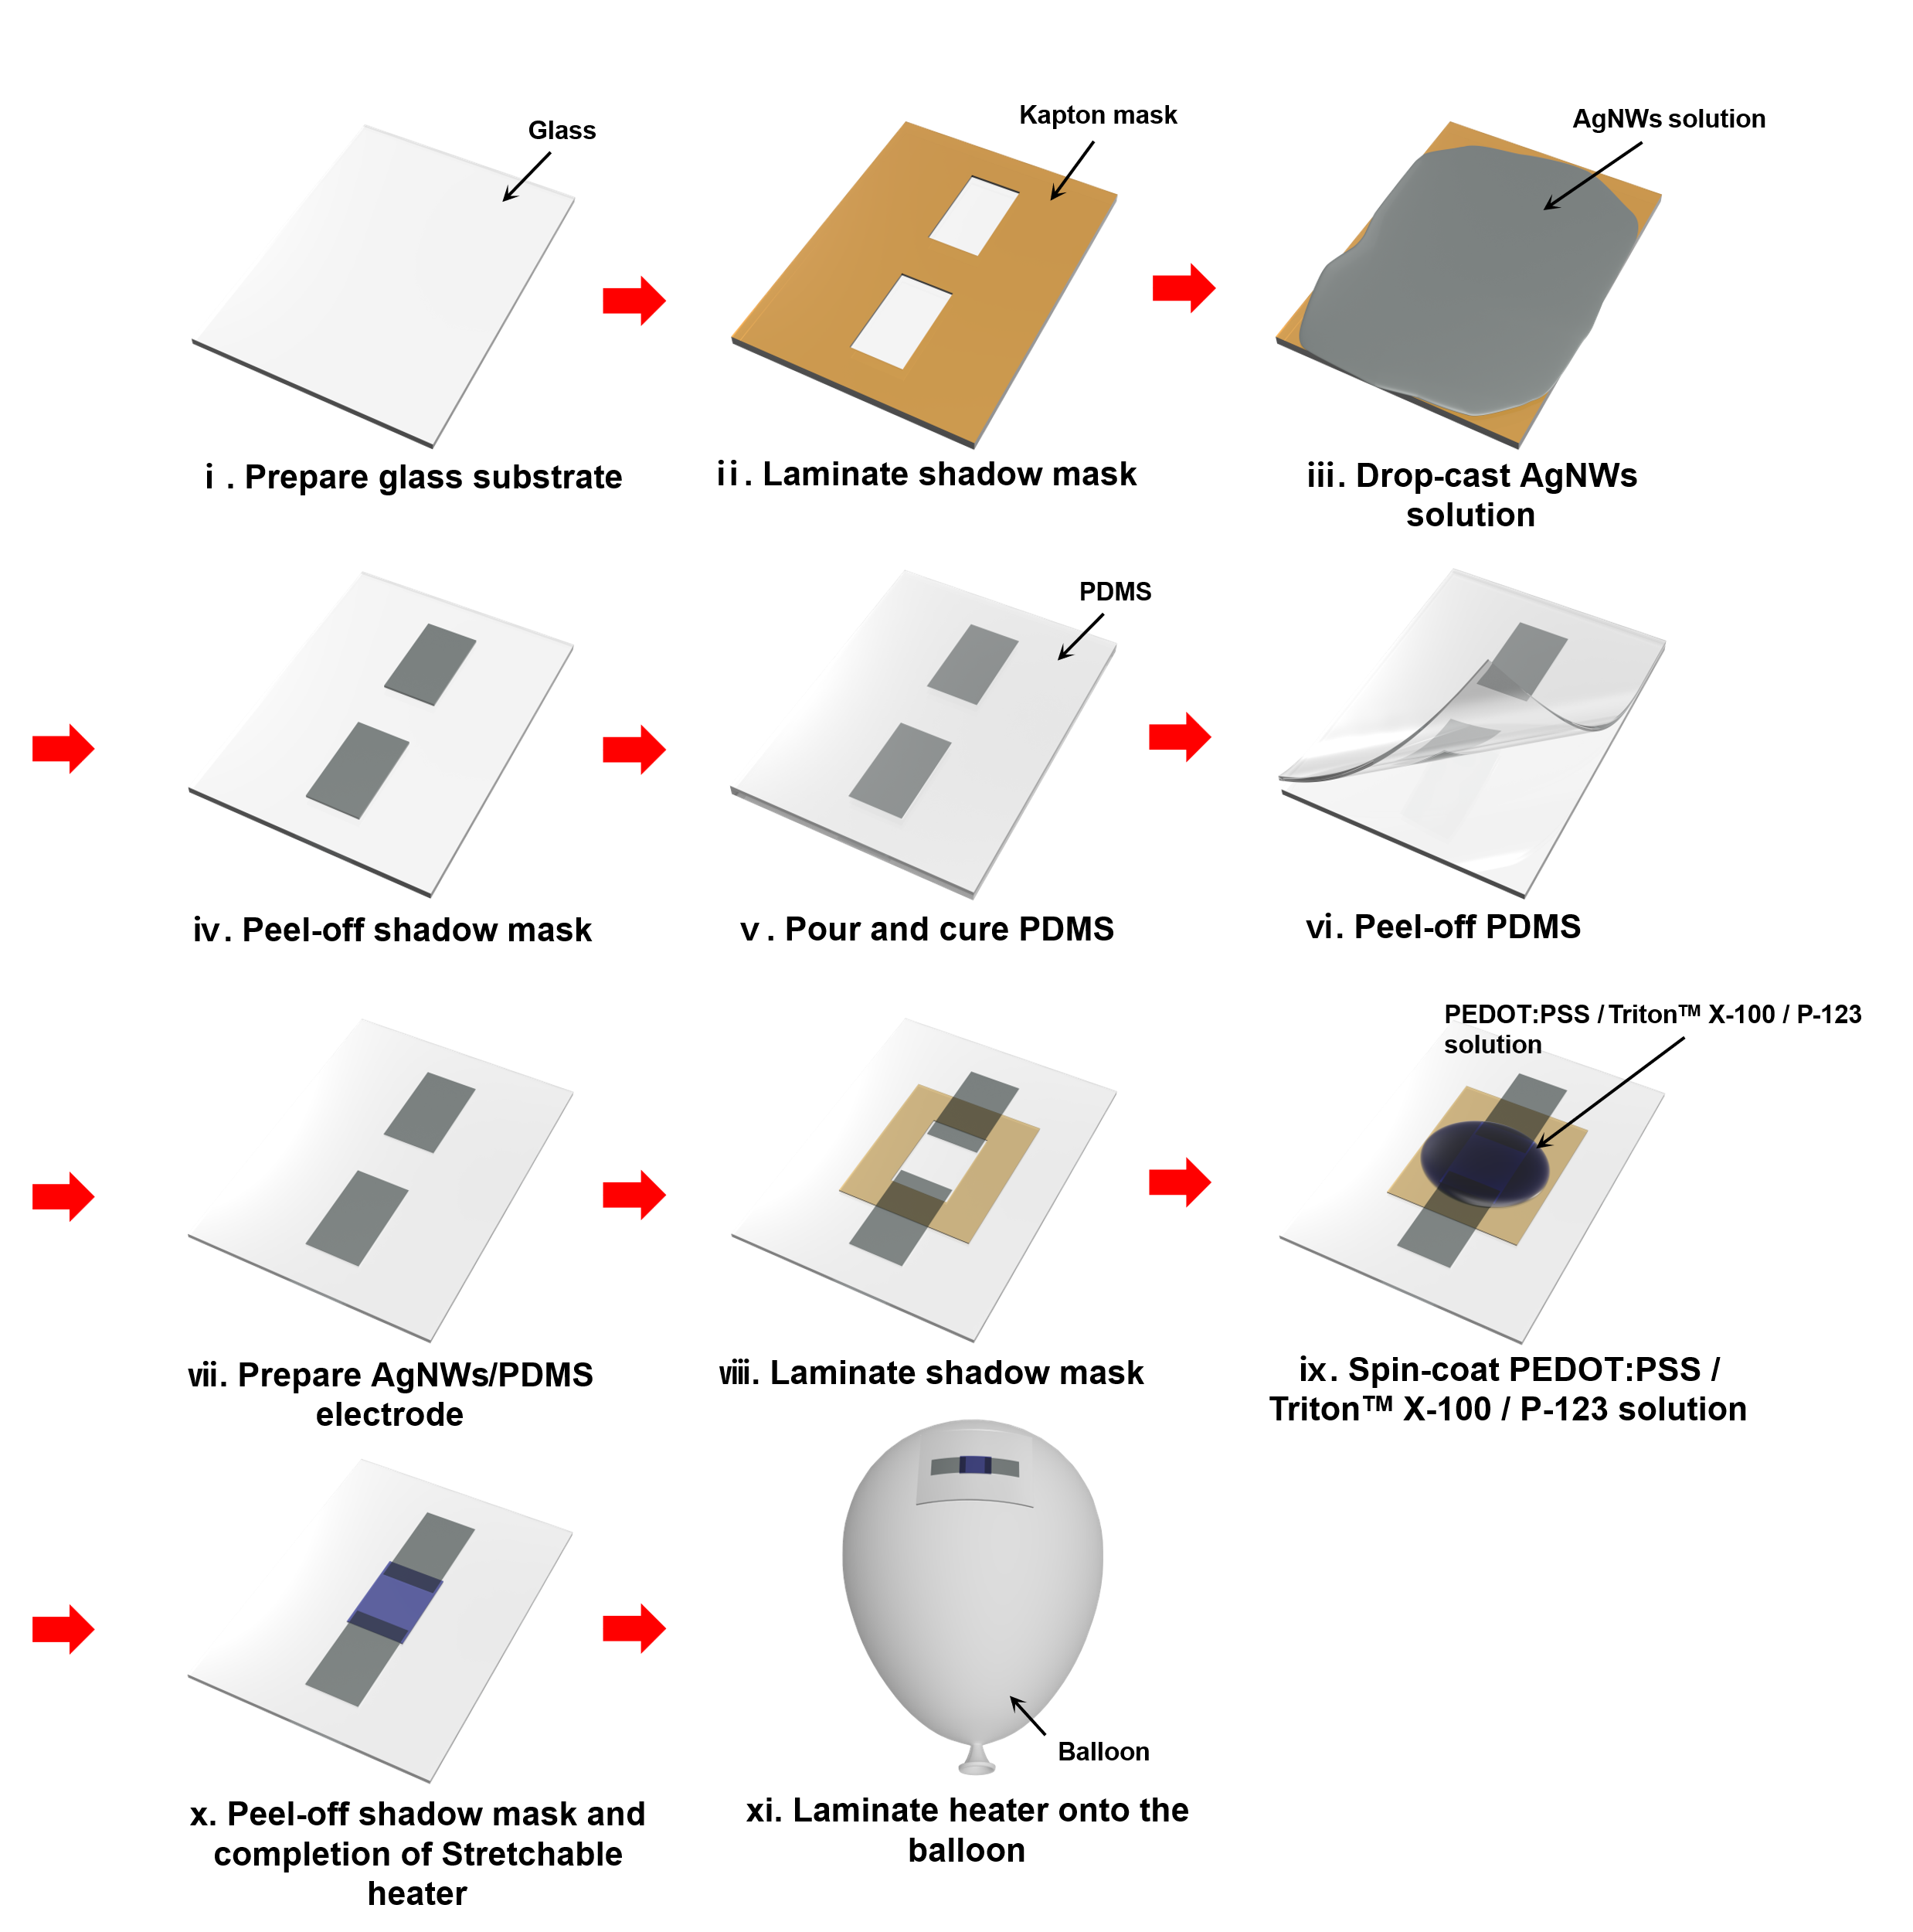


**Supplementary Figure 21**. Schematic fabrication process of the stretchable heater and the complete edema simulation system.


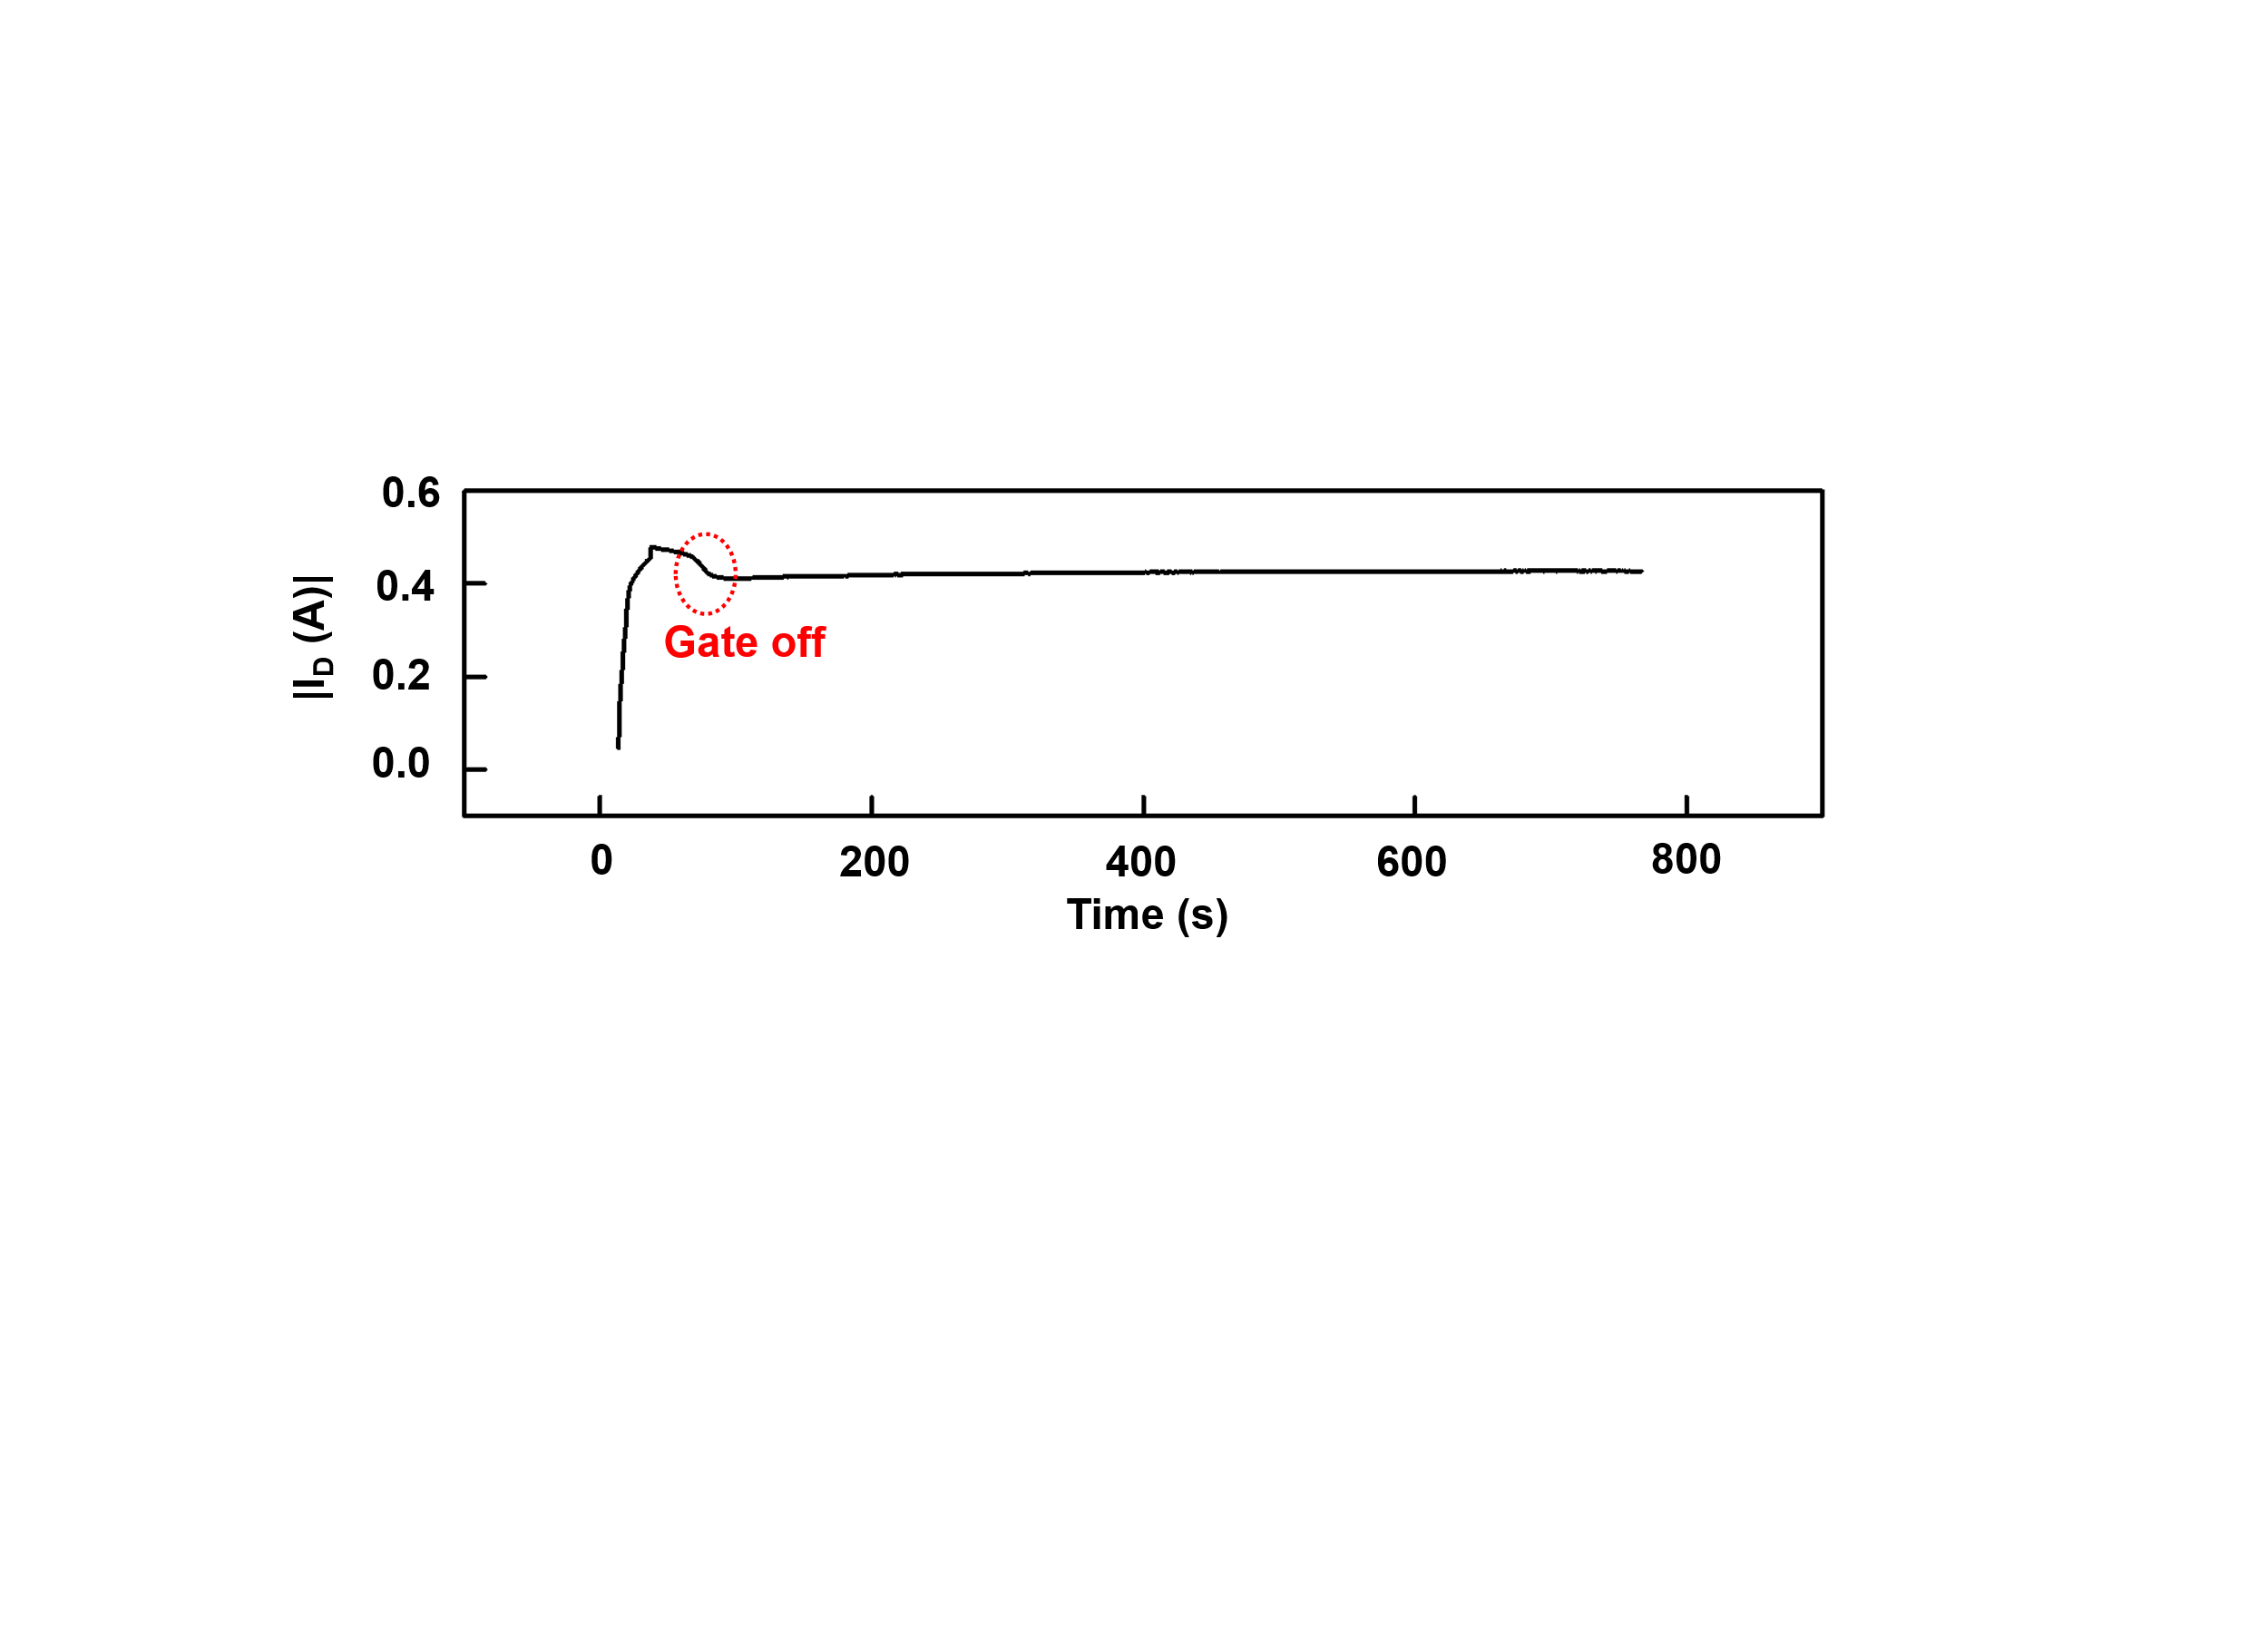


**Supplementary Figure 22**. The long-term memory characteristics of synaptic-mode OECT.


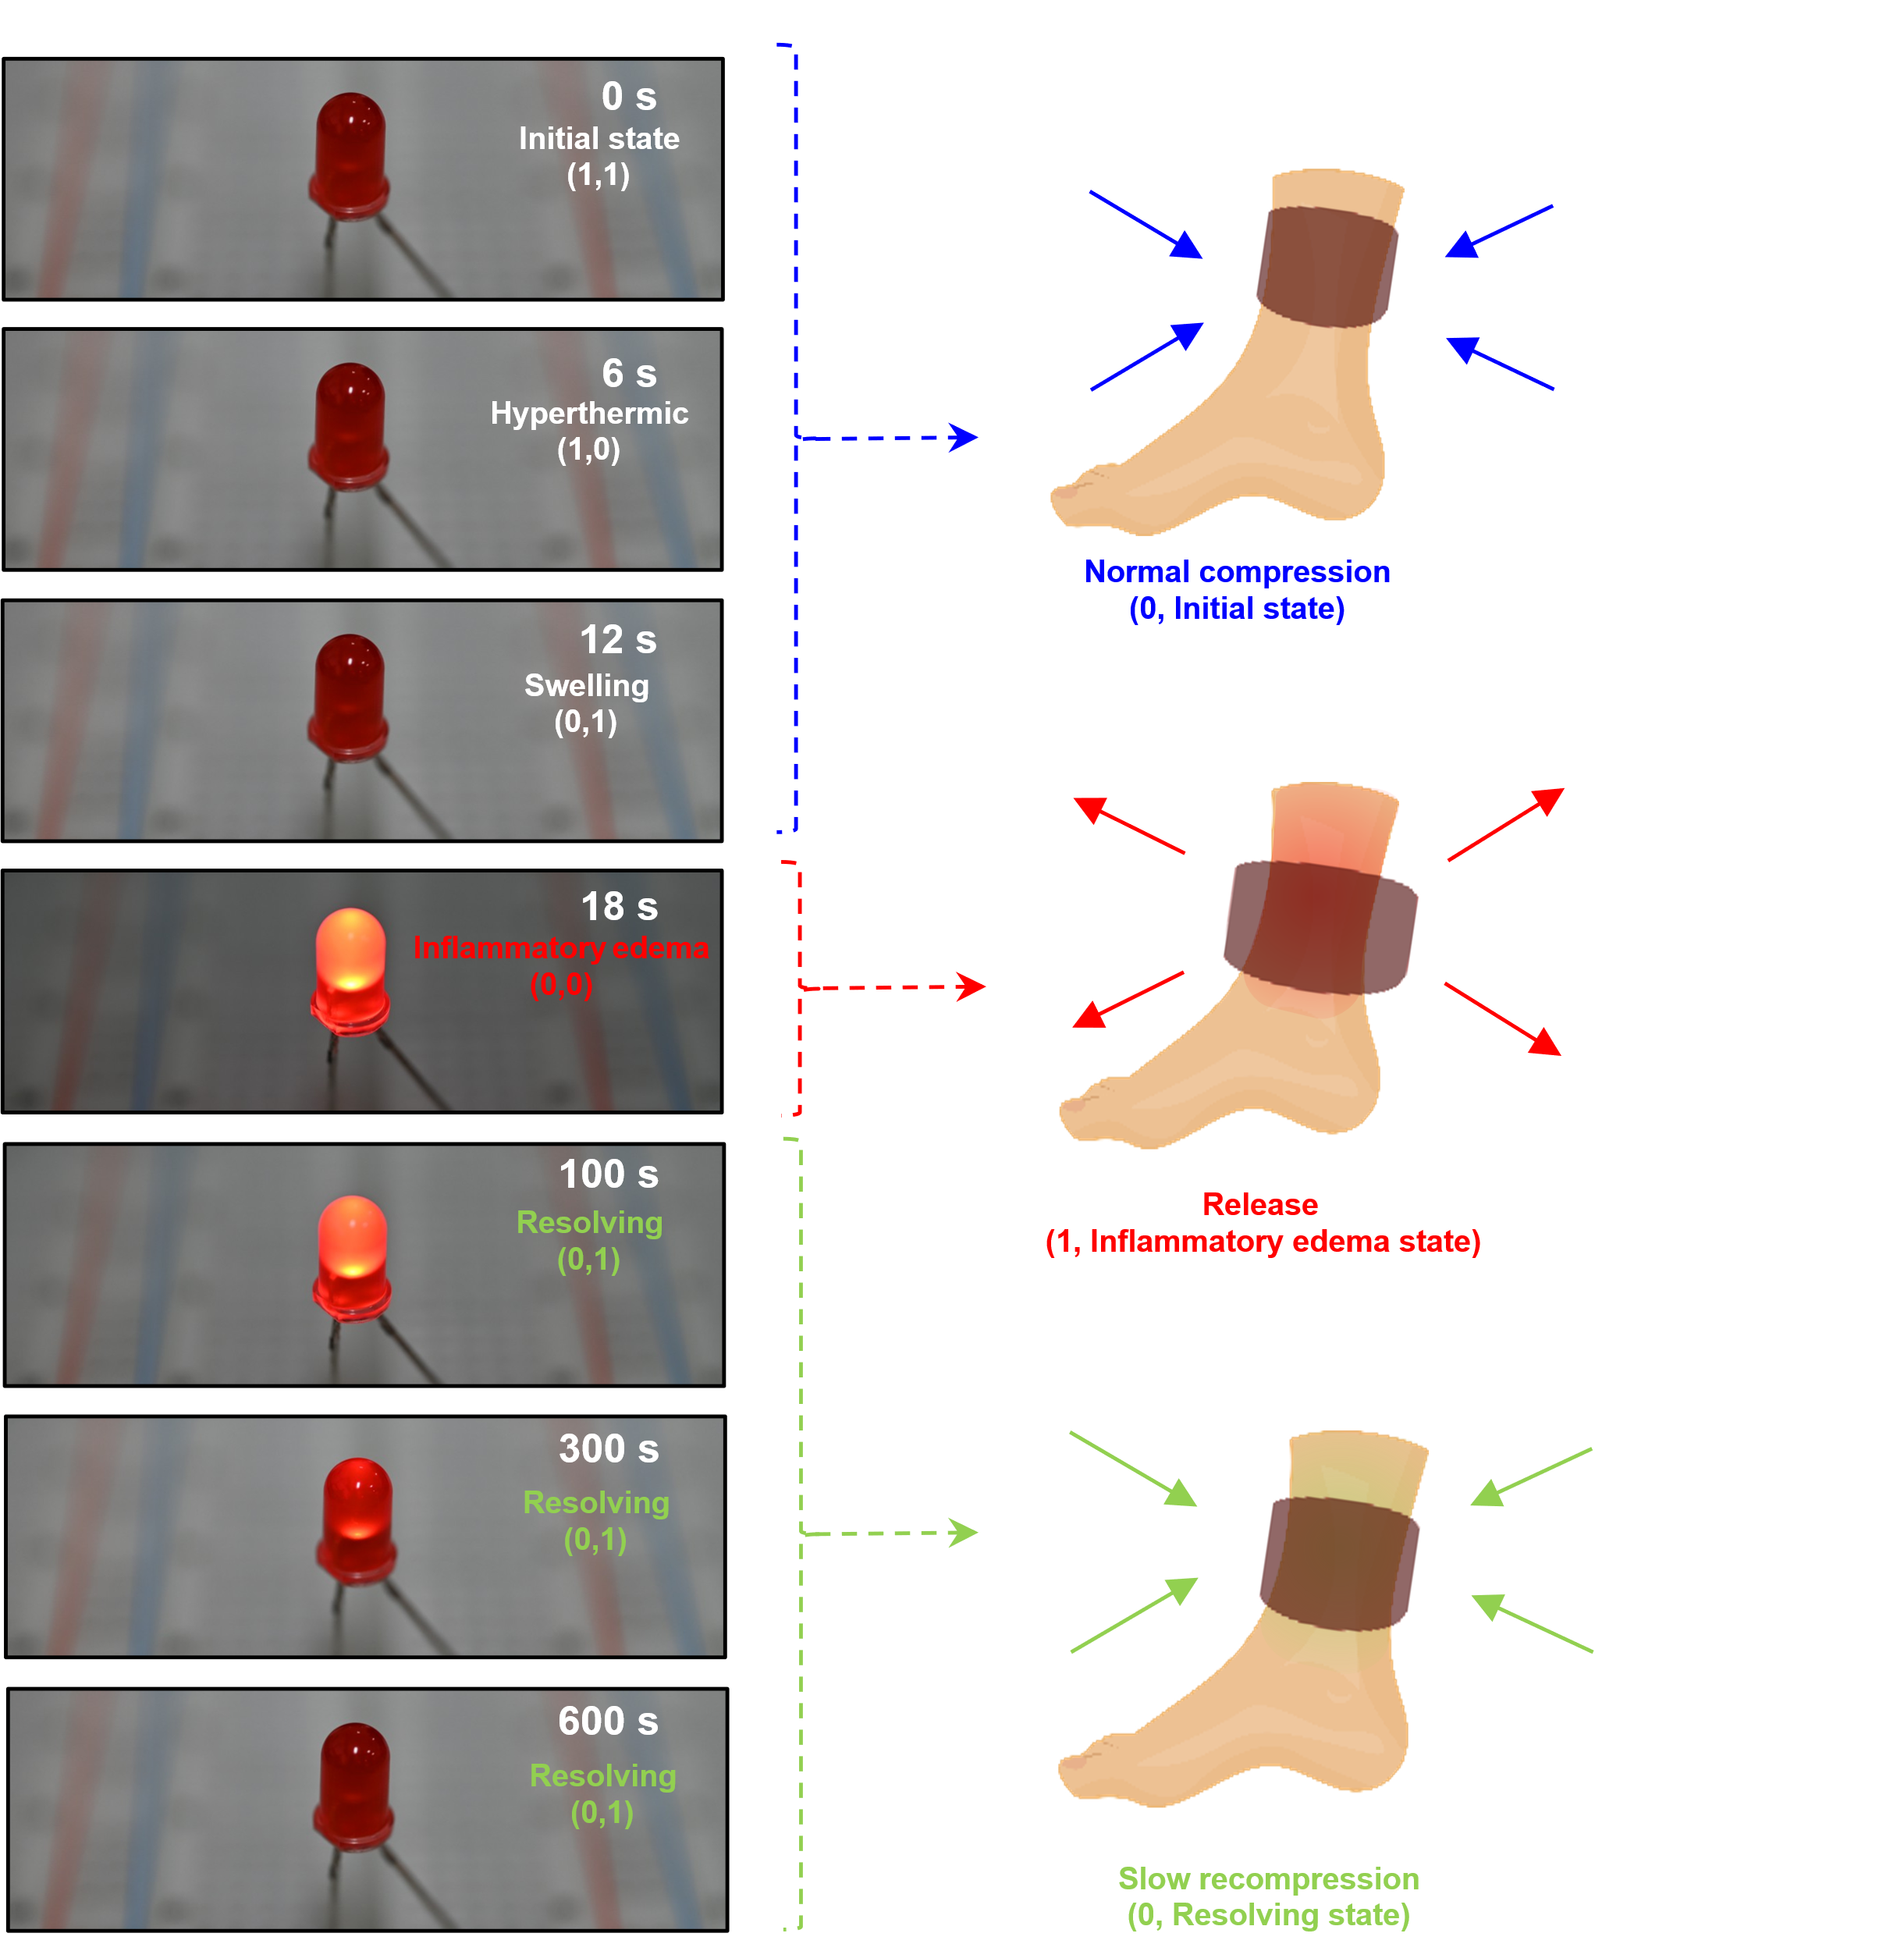


**Supplementary Figure 23**. Observation of LED response driven by the output signal from the adaptive logic system.
